**INFERENCE OF CELL TYPE COMPOSITION FROM HUMAN BRAIN TRANSCRIPTOMIC DATASETS ILLUMINATES THE EFFECTS OF AGE, MANNER OF DEATH, DISSECTION, AND PSYCHIATRIC DIAGNOSIS**

\*Megan Hastings Hagenauer, Ph.D.<sup>1</sup>, Anton Schulmann, M.D.<sup>2</sup>, Jun Z. Li, Ph.D.<sup>3</sup>, Marquis P. Vawter, Ph.D.<sup>4</sup>, David M. Walsh, Psy.D.<sup>4</sup>, Robert C. Thompson, Ph.D.<sup>1</sup>, Courtney A. Turner, Ph.D.<sup>1</sup>, William E. Bunney, M.D.<sup>4</sup>, Richard M. Myers, Ph.D.<sup>5</sup>, Jack D. Barchas, M.D.<sup>6</sup>, Alan F. Schatzberg, M.D.<sup>7</sup>, Stanley J. Watson, M.D., Ph.D.<sup>1</sup>, Huda Akil, Ph.D.<sup>1</sup>

<sup>1</sup>Mol. Behavioral Neurosci. Inst., Univ. of Michigan, Ann Arbor, MI, USA; <sup>2</sup>Janelia Research Campus, Howard Hughes Medical Institute, Ashburn, VA, USA, <sup>3</sup>Genet., Univ. of Michigan, Ann Arbor, MI, USA; <sup>4</sup>Univ. of California, Irvine, CA; <sup>5</sup>HudsonAlpha Inst. for Biotech., Huntsville, AL, USA; <sup>6</sup>Stanford, Palo Alto, CA, <sup>7</sup>Cornell, New York, NY, USA

\*Corresponding Author: Megan Hastings Hagenauer, Ph.D.

e-mail: [hagenaue@umich.edu](mailto:hagenaue@umich.edu)

Molecular Behavioral Neuroscience Institute (MBNI)

205 Zina Pitcher Pl.

Ann Arbor, MI 48109

|                                                                                                                                                                       |           |
|-----------------------------------------------------------------------------------------------------------------------------------------------------------------------|-----------|
| <b>ABSTRACT</b>                                                                                                                                                       | <b>4</b>  |
| <b>1. INTRODUCTION</b>                                                                                                                                                | <b>5</b>  |
| <b>2. METHODS &amp; VALIDATION</b>                                                                                                                                    | <b>7</b>  |
| 2.1 Compiling a Database of Cell Type Specific Transcripts                                                                                                            | 7         |
| 2.2 <i>“BrainInABlender”</i> : Employing the Database of Cell Type Specific Transcripts to Predict Relative Cell Type Balance in Heterogenous Brain Samples           | 10        |
| 2.3 Validation of Relative Cell Content Predictions Using Datasets Derived from Purified or Cultured Cells                                                            | 11        |
| 2.4 Validation of Relative Cell Content Predictions Using a Dataset Derived from Human Post-Mortem Tissue                                                             | 15        |
| 2.5 Using Cell Type Specific Transcripts to Predict Relative Cell Content in Transcriptomic Data from Macro-Dissected Human Cortical Tissue from Psychiatric Subjects | 16        |
| 2.6 Does the Reference Dataset Matter? Cell Type Specific Transcripts Identified by Different Publications Produce Similar Predictions of Relative Cell Type Balance  | 18        |
| <b>3. RESULTS</b>                                                                                                                                                     | <b>19</b> |
| 3.1 Inferred Cell Type Composition Explains a Large Percentage of the Sample-Sample Variability in Microarray Data from Macro-Dissected Human Cortical Tissue         | 19        |
| 3.2 Cell Content Predictions Derived from Microarray Data Match Known Relationships Between Clinical/Biological Variables and Brain Tissue Cell Content               | 22        |
| 3.3 Cell Type Balance Changes in Response to Psychiatric Diagnosis                                                                                                    | 29        |
| 3.4 Discriminating Between Changes in Cell Type Balance and Cell-Type Specific Function                                                                               | 30        |
| 3.5 Including Cell Content Predictions in the Analysis of Microarray Data Improves Model Fit And Enhances the Detection of Diagnosis-Related Genes in Some Datasets   | 32        |
| <b>4. DISCUSSION</b>                                                                                                                                                  | <b>39</b> |
| <b>5. ACKNOWLEDGEMENTS</b>                                                                                                                                            | <b>44</b> |
| <b>6. REFERENCES</b>                                                                                                                                                  | <b>45</b> |
| <b>7. SUPPORTING INFORMATION</b>                                                                                                                                      | <b>55</b> |
| 7.1 Detailed Methods and Results: Using Cell Type Specific Transcripts to Predict Relative Cell Content in Datasets from Purified Cells and Artificial Cell Mixtures  | 56        |

|            |                                                                                                                                                                                                                             |            |
|------------|-----------------------------------------------------------------------------------------------------------------------------------------------------------------------------------------------------------------------------|------------|
| <b>7.2</b> | <b>Comparison of Our Method vs. PSEA: Predicting Cell Identity in a Human Single-Cell RNA-Seq Dataset</b>                                                                                                                   | <b>68</b>  |
| <b>7.3</b> | <b>Additional Detailed Preprocessing Methods for the Macro-Dissected Microarray Datasets</b>                                                                                                                                | <b>76</b>  |
| 7.3.1      | Pritzker Dorsolateral Prefrontal Cortex Microarray Dataset (GSE92538)                                                                                                                                                       | 76         |
| 7.3.2      | Allen Brain Atlas Cross-Regional Microarray Dataset                                                                                                                                                                         | 78         |
| 7.3.3      | Human Cortical Microarray Dataset GSE53987 (submitted to GEO by Lanz et al. (36))                                                                                                                                           | 79         |
| 7.3.4      | Human Cortical Microarray Dataset GSE21138 (submitted to GEO by Narayan et al. (38))                                                                                                                                        | 79         |
| 7.3.5      | Human Cortical Microarray Dataset GSE21935 (submitted to GEO by Barnes et al. (37))                                                                                                                                         | 80         |
| 7.3.6      | CommonMind Consortium Human Cortical RNA-Seq Dataset                                                                                                                                                                        | 81         |
| <b>7.4</b> | <b><i>Additional figures and results: Does the Reference Dataset Matter? There is a Strong Convergence of Cell Content Predictions Derived from Cell Type Specific Transcripts Identified by Different Publications</i></b> | <b>81</b>  |
| <b>7.5</b> | <b><i>Additional figures and results: Cell Type Indices Predict Other Genes Known to Be Cell Type Enriched</i></b>                                                                                                          | <b>91</b>  |
| <b>7.6</b> | <b><i>Additional figures and results: Inferred Cell Type Composition Explains a Large Percentage of the Sample-Sample Variability in Microarray Data from Macro-Dissected Human Cortical Tissue</i></b>                     | <b>94</b>  |
| <b>7.7</b> | <b><i>Additional figures and results: Discriminating Between Changes in Cell Type Balance and Cell-Type Specific Function</i></b>                                                                                           | <b>98</b>  |
| <b>7.8</b> | <b>The Top Diagnosis-Related Genes Identified by Models that Include Cell Content Predictions Pinpoint Known Risk Candidates</b>                                                                                            | <b>99</b>  |
| <b>8.</b>  | <b>SUPPLEMENTARY TABLES</b>                                                                                                                                                                                                 | <b>105</b> |

## Abstract

Psychiatric illness is unlikely to arise from pathology occurring uniformly across all cell types in affected brain regions. Despite this, transcriptomic analyses of the human brain have typically been conducted using macro-dissected tissue due to the difficulty of performing single-cell type analyses with donated post-mortem brains. To address this issue statistically, we compiled a database of several thousand transcripts that were specifically-enriched in one of 10 primary cortical cell types, as identified in previous publications. Using this database, we predicted the relative cell type composition for 833 human cortical samples using microarray or RNA-Seq data from the Pritzker Consortium (GSE92538) or publicly-available databases (GSE53987, GSE21935, GSE21138, CommonMind Consortium). These predictions were generated by averaging normalized expression levels across transcripts specific to each cell type using our R-package *BrainInABlender* (validated and publicly-released: <https://github.com/hagenaue/BrainInABlender>). Using this method, we found that the principal components of variation in the datasets were largely explained by the neuron to glia ratio of the samples. This variability was not simply due to dissection – the relative balance of brain cell types was influenced by a variety of demographic, pre- and post-mortem variables. Prolonged hypoxia around the time of death predicted increased astrocytic and endothelial content in the tissue, illustrating vascular upregulation. Aging was associated with decreased neuronal content. Red blood cell content was reduced in individuals who died following systemic blood loss. Subjects with Major Depressive Disorder had decreased astrocytic content, mirroring previous morphometric observations. Subjects with Schizophrenia had reduced red blood cell content, resembling the hypofrontality detected in fMRI experiments. Finally, in datasets containing samples with especially variable cell content, we found that controlling for predicted sample cell content while evaluating differential expression improved the detection of previously-identified psychiatric effects. We conclude that accounting for cell type can greatly improve the interpretability of microarray data.



## 1 **1. Introduction**

2           The human brain is a remarkable mosaic of diverse cell types stratified into rolling cortical layers,  
3 arching white matter highways, and interlocking deep nuclei. In the past decade, we have come to  
4 recognize the importance of this cellular diversity in even the most basic neural circuits. At the same time,  
5 we have developed the capability to comprehensively measure the thousands of molecules essential for  
6 cell function. These insights have provided conflicting priorities within the study of psychiatric illness: do  
7 we carefully examine individual molecules within their cellular and anatomical context or do we extract  
8 transcript or protein en masse to perform large-scale unbiased transcriptomic or proteomic analyses? In  
9 rodent models, researchers have escaped this dilemma by a boon of new technology: single cell laser  
10 capture, cell culture, and cell-sorting techniques that can provide sufficient extract for transcriptomic and  
11 proteomic analyses. However, single cell analyses of the human brain are far more challenging (1–3) –  
12 live tissue is only available in the rarest of circumstances (such as temporal lobe resection) and intact  
13 single cells are difficult to dissociate from post-mortem tissue without intensive procedures like laser  
14 capture microscopy.

15           Therefore, to date, the vast majority of unbiased transcriptomic analyses of the human brain have  
16 been conducted using macro-dissected, cell-type heterogeneous tissue. On Gene Expression Omnibus  
17 alone, there are at least 63\* publicly-available macro-dissected post-mortem human brain tissue datasets,  
18 and many other macro-dissected human brain datasets are available to researchers via privately-funded  
19 portals (Stanley Medical Research Institute, Allen Brain Atlas, CommonMind Consortium). These  
20 datasets have provided us with novel hypotheses (e.g., (4,5)), but researchers who work with the data  
21 often report frustration with the relatively small number of candidate molecules that survive analyses  
22 using their painstakingly-collected samples, as well as the overwhelming challenge of interpreting  
23 molecular results in isolation from their respective cellular context. At the core of this issue is the inability  
24 to differentiate between (1) alterations in gene expression that reflect an overall disturbance in the relative

---

\* As of 9-14-2017

## Running Head: PREDICTING CELL TYPE BALANCE

25 ratio of the different cell types comprising the tissue sample, and (2) intrinsic dysregulation of one or  
26 more cell types, indicating perturbed biological function.

27 In this manuscript, we present results from an easily accessible solution to this problem that  
28 allows researchers to statistically estimate the relative number or transcriptional activity of particular cell  
29 types in macro-dissected human brain microarray data by tracking the collective rise and fall of  
30 previously identified cell type specific transcripts. Similar techniques have been used to successfully  
31 predict cell type content in human blood samples (6–9), as well as diseased and aged brain samples (10–  
32 12). Our method was specifically designed for application to large, highly-normalized human brain  
33 transcriptional profiling datasets, such as those commonly used by neuroscientific research bodies such as  
34 the Pritzker Neuropsychiatric Research Consortium and the Allen Brain Institute.

35 We took advantage of a series of newly available data sources depicting the transcriptome of  
36 known cell types, and applied them to infer the relative balance of cell types in our tissue samples in a  
37 semi-supervised fashion. We draw from seven large studies detailing cell-type specific gene expression  
38 in a wide variety of cells in the forebrain and cortex (2,13–18). Our analyses include all major categories  
39 of cortical cell types (17), including two overarching categories of neurons that have been implicated in  
40 psychiatric illness (19): projection neurons, which are large, pyramidal, and predominantly excitatory, and  
41 interneurons, which are small and predominantly inhibitory (20). These are accompanied by the three  
42 prevalent forms of glia that make up the majority of cells in the brain: oligodendrocytes, which provide  
43 the insulating myelin sheath that enhances electrical transmission in axons (21), astrocytes, which help  
44 create the blood-brain barrier and provide structural and metabolic support for neurons, including  
45 extracellular chemical and electrical homeostasis, signal propagation, and response to injury (21), and  
46 microglia, which serve as the brain's resident macrophages and provide an active immune response (21).  
47 We also incorporate structural and vascular cell types: endothelial cells, which line the interior surface of  
48 blood vessels, and mural cells (smooth muscle cells and pericytes), which regulate blood flow (22).  
49 Progenitor cells were also included in our analysis because they are widely regarded as important for the  
50 pathogenesis of mood disorders (23). Within the cortex, these cells mostly take the form of immature

51 oligodendrocytes (17). Finally, the primary cells found in blood, erythrocytes or red blood cells (RBCs),  
52 carry essential oxygen throughout the brain. These cells do not contain a cell nucleus and do not generate  
53 new RNA, but still contain an existing, highly-specialized transcriptome (24). The relative presence of  
54 these cells could arguably represent overall blood flow, the functional marker of regional neural activity  
55 traditionally used in human imaging studies.

56 To characterize the balance of these cell types in psychiatric samples, we first compared the  
57 predictive value of cell type specific transcripts identified by diverse data sources and then summarized  
58 their collective predictions of relative cell type balance into covariates that could be used in larger linear  
59 regression models. We find that these “cell type indices” can successfully predict relative cell content in  
60 validation datasets, including *in vitro* and post-mortem datasets. We discover that the variability in the  
61 relative cell type balance of samples can explain a large percentage of the variation in macro-dissected  
62 human brain microarray and RNA-Seq datasets. This variability is driven by pre- and post-mortem  
63 subject variables, such as age, aerobic environment, and large scale blood loss, in addition to dissection.  
64 Finally, we demonstrate that this method enhances our ability to discover and interpret psychiatric effects  
65 in human brain microarray datasets, uncovering known changes in cell type balance in relationship to  
66 Major Depressive Disorder and Schizophrenia and potentially increasing our sensitivity to detect genes  
67 with previously-identified relationships to Bipolar Disorder and Schizophrenia in datasets that contain  
68 samples with highly-variable cell content.

69

## 70 **2. Methods & Validation**

71

### 72 **2.1 Compiling a Database of Cell Type Specific Transcripts**

73 To perform this analysis, we compiled a database of several thousand transcripts that were  
74 specifically-enriched in one of nine primary brain cell types within seven published single-cell or purified  
75 cell type transcriptomic experiments using mammalian brain tissues (2,13–18) (**Suppl. Table 1**). These

## Running Head: PREDICTING CELL TYPE BALANCE

76 primary brain cell types included six types of support cells: astrocytes, endothelial cells, mural cells,  
77 microglia, immature and mature oligodendrocytes, as well as two broad categories of neurons  
78 (interneurons and projection neurons). We also included a category for neurons that were generically  
79 extracted (“neuron\_all”). The experimental and statistical methods for determining whether a transcript  
80 was enriched in a particular cell type varied by publication (**Figure 1**), and included both RNA-Seq and  
81 microarray datasets. We focused on cell-type specific transcripts identified using cortical or forebrain  
82 samples because the data available for these brain regions was more plentiful than for the deep nuclei or  
83 the cerebellum. In addition, we artificially generated a list of 17 transcripts specific to erythrocytes (red  
84 blood cells or RBC) by searching Gene Card for erythrocyte and hemoglobin-related genes  
85 (<http://www.genecards.org/>).

86 In all, we curated gene expression signatures for 10 cell types expected to account for most of the  
87 cells in the cortex. Our final database included 2499 unique human-derived or orthologous (as predicted  
88 by HCOP using 11 available databases: <http://www.genenames.org/cgi-bin/hcop>) transcripts, with a focus  
89 on coding varieties. We have made this database publicly accessible within our R package  
90 (<https://github.com/hagenaue/BrainInABlender>) and as a downloadable spreadsheet  
91 (<https://sites.google.com/a/umich.edu/megan-hastings-hagenauer/home/cell-type-analysis>).

Running Head: PREDICTING CELL TYPE BALANCE

| Citation                                  | Cell Origin                                                                                                                                               | Method                                                                                                                                                         | Stringency                                                              | Derived Cortical Cell Type Indices | Transcripts/Orthologs |
|-------------------------------------------|-----------------------------------------------------------------------------------------------------------------------------------------------------------|----------------------------------------------------------------------------------------------------------------------------------------------------------------|-------------------------------------------------------------------------|------------------------------------|-----------------------|
| Cahoy et al., <i>J Neuro</i> , 2008.      | Forebrain of young transgenic mice                                                                                                                        | Fluorescent cell sorting using antibodies to deplete non-specific cell types followed by Affymetrix microarray                                                 | >20 Fold Enrichment                                                     | Astrocyte_All                      | 73                    |
|                                           |                                                                                                                                                           |                                                                                                                                                                |                                                                         | Neuron_All                         | 80                    |
|                                           |                                                                                                                                                           |                                                                                                                                                                |                                                                         | Oligodendrocyte_All                | 50                    |
| Zhang et al., <i>J Neuro</i> , 2014       | Cortex of young transgenic mice                                                                                                                           | Fluorescent cell sorting using antibodies to deplete non-specific cell types followed by RNAseq                                                                | Top 40 transcripts with >20 Fold Enrichment                             | Astrocyte_All                      | 40                    |
|                                           |                                                                                                                                                           |                                                                                                                                                                |                                                                         | Endothelial_All                    | 40                    |
|                                           |                                                                                                                                                           |                                                                                                                                                                |                                                                         | Microglia_All                      | 40                    |
|                                           |                                                                                                                                                           |                                                                                                                                                                |                                                                         | Mural_Pericyte                     | 40                    |
|                                           |                                                                                                                                                           |                                                                                                                                                                |                                                                         | Neuron_All                         | 40                    |
|                                           |                                                                                                                                                           |                                                                                                                                                                |                                                                         | Oligodendrocyte_Myelinating        | 40                    |
|                                           |                                                                                                                                                           |                                                                                                                                                                |                                                                         | Oligodendrocyte_Newly-Formed       | 39                    |
|                                           |                                                                                                                                                           |                                                                                                                                                                |                                                                         | Oligodendrocyte_Progenitor Cell    | 40                    |
| Zeisel et al., <i>Science</i> , 2015      | Somatosensory cortex and CA1 hippocampus of juvenile mice                                                                                                 | Unbiased capture of single cells from whole tissue cell suspension followed by RNAseq                                                                          | Enriched with 99.9% posterior probability                               | Astrocyte_All                      | 240                   |
|                                           |                                                                                                                                                           |                                                                                                                                                                |                                                                         | Endothelial_All                    | 353                   |
|                                           |                                                                                                                                                           |                                                                                                                                                                |                                                                         | Microglia_All                      | 436                   |
|                                           |                                                                                                                                                           |                                                                                                                                                                |                                                                         | Mural_All                          | 155                   |
|                                           |                                                                                                                                                           |                                                                                                                                                                |                                                                         | Neuron_Interneuron                 | 365                   |
|                                           |                                                                                                                                                           |                                                                                                                                                                |                                                                         | Neuron_Pyramidal_Cortical          | 294                   |
|                                           |                                                                                                                                                           |                                                                                                                                                                |                                                                         | Oligodendrocyte_All                | 453                   |
| Darmanis et al., <i>PNAS</i> , 2015       | Anterior temporal lobe resected from adult human epileptic patients and cortex from fetuses 16-18 wks postgestation.                                      | Unbiased capture of single cells from whole tissue cell suspension followed by RNAseq                                                                          | Top 20 enriched transcripts                                             | Astrocyte_All                      | 21                    |
|                                           |                                                                                                                                                           |                                                                                                                                                                |                                                                         | Endothelial_All                    | 21                    |
|                                           |                                                                                                                                                           |                                                                                                                                                                |                                                                         | Microglia_All                      | 21                    |
|                                           |                                                                                                                                                           |                                                                                                                                                                |                                                                         | Neuron_All                         | 21                    |
|                                           |                                                                                                                                                           |                                                                                                                                                                |                                                                         | Oligodendrocyte_Mature             | 21                    |
|                                           |                                                                                                                                                           |                                                                                                                                                                |                                                                         | Oligodendrocyte_Progenitor Cell    | 21                    |
| Doyle et al., <i>Cell</i> , 2008          | Cortex, Striatum, Cerebellum, Spinal Cord, Basal Forebrain, and Brain Stem of young transgenic mice                                                       | Capture of translated mRNA from specific cell types labeled in transgenic mice using translating ribosome affinity purification (TRAP) followed by microarray. | Top 25 enriched transcripts determined by iterative rank comparisons    | Astrocyte_All                      | 25                    |
|                                           |                                                                                                                                                           |                                                                                                                                                                |                                                                         | Neuron_CorticoSpinal               | 25                    |
|                                           |                                                                                                                                                           |                                                                                                                                                                |                                                                         | Neuron_CorticoStriatal             | 25                    |
|                                           |                                                                                                                                                           |                                                                                                                                                                |                                                                         | Neuron_CorticoThalamic             | 25                    |
|                                           |                                                                                                                                                           |                                                                                                                                                                |                                                                         | Neuron_Interneuron_CORT            | 25                    |
|                                           |                                                                                                                                                           |                                                                                                                                                                |                                                                         | Neuron_Neuron_CCK                  | 25                    |
|                                           |                                                                                                                                                           |                                                                                                                                                                |                                                                         | Neuron_Neuron_PNOC                 | 24                    |
|                                           |                                                                                                                                                           |                                                                                                                                                                |                                                                         | Oligodendrocyte_All                | 25                    |
|                                           |                                                                                                                                                           |                                                                                                                                                                |                                                                         | Oligodendrocyte_Mature             | 25                    |
| Daneman et al., <i>PLOS</i> , 2010        | Cortex of young transgenic mice                                                                                                                           | Fluorescent cell sorting using antibodies to deplete non-specific cell types followed by Affymetrix microarray                                                 | >20 Fold enrichment for endothelial, >8 fold enrichment for vasculature | Endothelial_All                    | 49                    |
|                                           |                                                                                                                                                           |                                                                                                                                                                |                                                                         | Mural_Vascular                     | 50                    |
| Sugino et al., <i>Nature Neuro</i> , 2006 | Cingulate and Somatosensory Cortices, Basolateral Amygdala, CA1-CA3 Hippocampus, and Dorsal Lateral Geniculate Nucleus of the Thalamus of transgenic mice | Hand-sorting fluorescently-labeled cells followed by amplification and Affymetrix microarray                                                                   | Enriched with $p < 1.5E-11$                                             | Neuron_GABA                        | 32                    |
|                                           |                                                                                                                                                           |                                                                                                                                                                |                                                                         | Neuron_Glutamate                   | 67                    |
| <i>Gene card</i>                          | Human                                                                                                                                                     | Erythrocyte-related genes                                                                                                                                      | Unknown                                                                 | RBC_All                            | 17                    |

92

93 **Figure 1. Thousands of transcripts have been identified as specifically-enriched in particular cortical**  
 94 **cell types within published single-cell or purified cell type transcriptomic experiments (“reference**  
 95 **datasets”). The experimental and statistical methods for determining whether a transcript was enriched**  
 96 **in a cell type varied by publication, and included both RNA-Seq and microarray datasets.**

97

98 **2.2 “BrainInABlender”: Employing the Database of Cell Type Specific Transcripts to Predict**  
99 **Relative Cell Type Balance in Heterogenous Brain Samples**

100 Next, we designed a method that uses the collective expression of cell type specific transcripts in  
101 brain tissue samples to predict the relative cell type balance of the samples (“BrainInABlender”). We  
102 specifically designed our method to be compatible with large, highly-normalized human brain  
103 transcriptional profiling datasets such as those used by our neuropsychiatric research consortium  
104 (Pritzker). We have made our method publicly-available in the form of a downloadable R package  
105 (<https://github.com/hagenaue/BrainInABlender>).

106 In brief, BrainInABlender extracts the data from any particular transcriptional profiling dataset  
107 (microarray, RNA-Seq) that represent genes identified in our database as having cell type specific  
108 expression in the brain (as curated by official gene symbol). The expression-level data for each of these  
109 transcripts (RNA-Seq: gene-level summary, microarray: probe or probeset summary) are then centered  
110 and scaled across samples (mean=0, sd=1) to prevent transcripts with more variable signal from exerting  
111 disproportionate influence on the results. Then, if necessary, the normalized data from all transcripts  
112 representing the same gene are averaged for each sample and re-normalized. Finally, for each sample,  
113 these values are averaged across the genes identified as having expression specific to a particular cell type  
114 in each publication included in the database of cell transcripts. This creates 38 cell type signatures derived  
115 from the cell type specific genes identified by the eight publications (“Cell Type Indices”, **Figure 1**), each  
116 of which predicts the relative content for one of the 10 primary cell types in our brain samples (**Figure 2**).

117 Please note that our method was specifically designed to tackle challenges present in the Pritzker  
118 Consortium microarray data, but we later discovered that it bears some resemblance to the existing  
119 method of Population Specific Expression Analysis (PSEA, (10–12)). A more detailed discussion of the  
120 similarities and differences between the techniques can be found in **Section 7.2**.

Running Head: PREDICTING CELL TYPE BALANCE

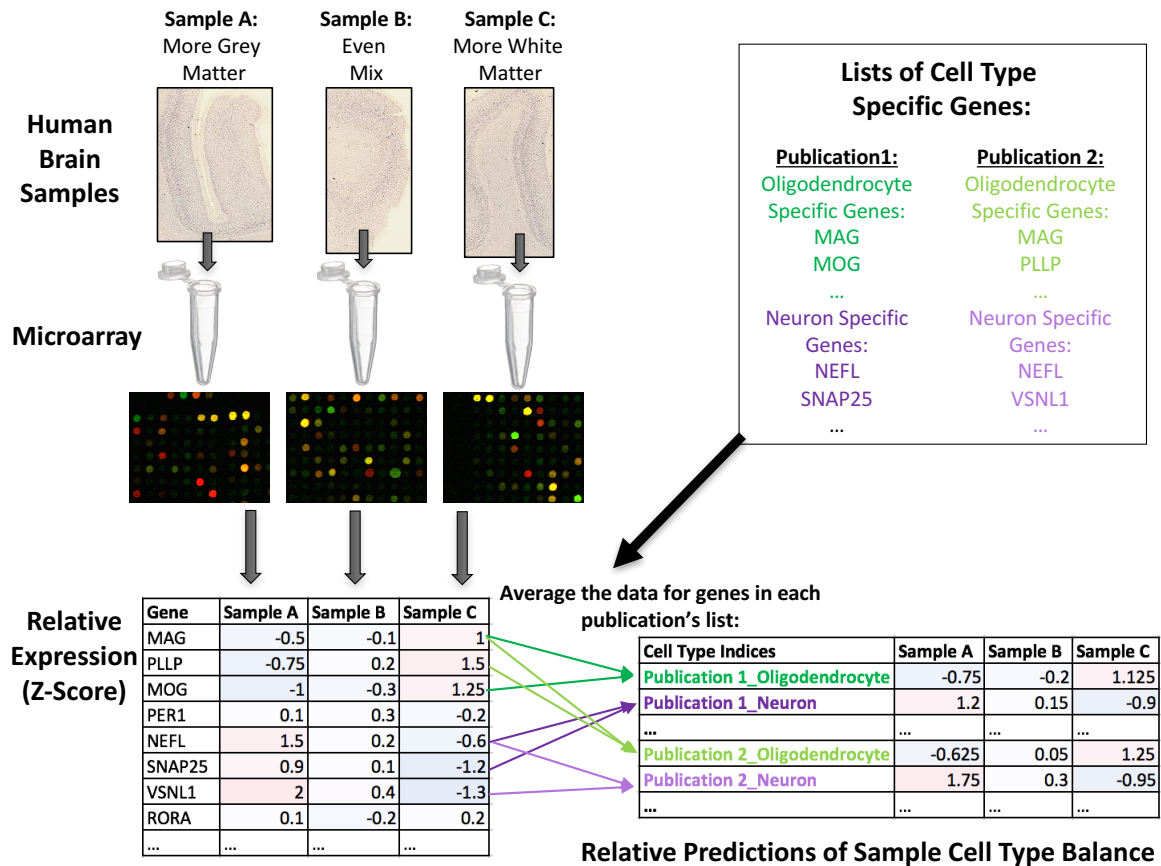

121 **Figure 2. Predicting the relative cell type balance in human brain samples using genes previously-**  
 122 **identified as having cell type specific expression.** Within macro-dissected brain tissue samples, variable  
 123 cell type balance is likely to influence the pattern of gene expression. To estimate this variability, we  
 124 extracted the microarray data for probe sets representing genes that had been previously identified as  
 125 having cell type specific expression in previous publications (“Lists of Cell Type Specific Genes”, **Figure**  
 126 **1**) and then averaged across the transcripts identified as specific to a particular cell type in each  
 127 publication to create 38 different “Cell Type Indices” that predicted relative cell content in each of the  
 128 brain samples.

129

130 **2.3 Validation of Relative Cell Content Predictions Using Datasets Derived from Purified or**  
 131 **Cultured Cells**

132 We validated the method using publicly-available datasets from purified cell types and artificial  
 133 cell mixtures (**Supplementary Methods and Results**). We found that the statistical cell type indices easily  
 134 predicted the cell type identities of purified samples (datasets GSE52564 and GSE6783; (2,18); **Suppl.**  
 135 **Figure 1, Suppl. Figure 2**). This was true regardless of the publication from which the cell type specific  
 136 genes were derived: cell type specific gene lists derived from publications using different species (human

## Running Head: PREDICTING CELL TYPE BALANCE

137 vs. mouse), platforms (microarray vs. RNA-Seq), methodologies (florescent cell sorting vs. suspension),  
138 or statistical stringency all performed fairly equivalently, with some minor exception. Occasionally, we  
139 found that the cell type indices associated with cell type specific gene lists derived from TRAP  
140 methodology (15) did not properly predict the cell identity of the samples. In general the cell type indices  
141 associated with immature oligodendrocytes were somewhat inconsistent, most likely due to their  
142 dependency on developmental stage and experimental conditions.

143 Therefore, overall we found substantial support for simply averaging the individual publication-  
144 specific cell type indices within each of ten primary categories (astrocytes, endothelial cells, mural cells,  
145 microglia, immature and mature oligodendrocytes, red blood cells, interneurons, projection neurons, and  
146 indices derived from neurons in general) to produce ten consolidated primary cell-type indices for each  
147 sample. To perform this consolidation, we also removed any transcripts that were identified as “cell type  
148 specific” to multiple primary cell type categories (**Suppl. Figure 5**). These consolidated indices are  
149 included as a output from BrainInABlender.

150 Next, as further validation, we determined whether relative cell type balance could be accurately  
151 deciphered from microarray data for samples containing artificially-generated mixtures of cultured cells  
152 (GSE19380; (12)). We found that the consolidated cell type indices produced by BrainInABlender  
153 strongly correlated with the actual percentage of cells of a particular type included in the artificial  
154 mixtures (**Figure 3**, Neuron% vs. Neuron\_All Index: R-squared=0.93,  $p=1.54e-15$ , Astrocyte % vs.  
155 Astrocyte Index: R-squared=0.77,  $p=5.05e-09$ , Microglia% vs. Microglia Index: R-Squared=0.64,  $p=$   
156  $8.2e-07$ ), although we found that the cell type index for immature oligodendrocytes better predicted the  
157 percentage of cultured oligodendrocytes in the samples than the cell type index for mature  
158 oligodendrocytes (Mature: R-squared=0.45,  $p=0.000179$ , Immature: R-squared=0.81,  $p=4.14e-10$ ). We  
159 believe this discrepancy is likely to reflect the specific cell culture conditions used in the original  
160 admixture experiment. In a follow-up analysis, artificial mixtures of cells produced *in silico* by averaging  
161 randomly-selected data from purified cell types similarly indicated that the cell type indices produced by



Running Head: PREDICTING CELL TYPE BALANCE

162 BrainInABlender follow a linear relationship with actual cell type balance in mixed samples, even for less  
163 prevalent cell varieties (endothelial, **Suppl. Figure 3, Suppl. Figure 4**).

## Running Head: PREDICTING CELL TYPE BALANCE

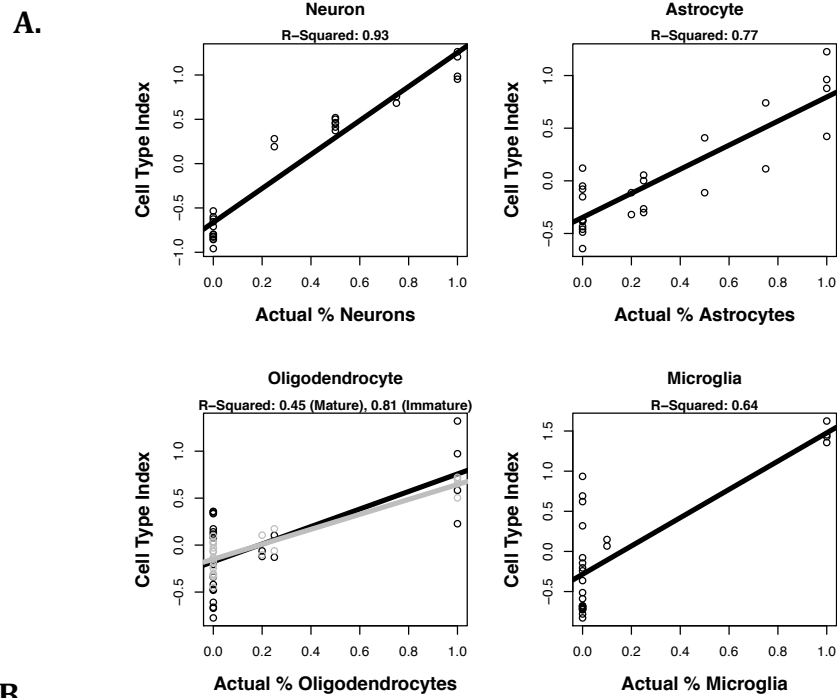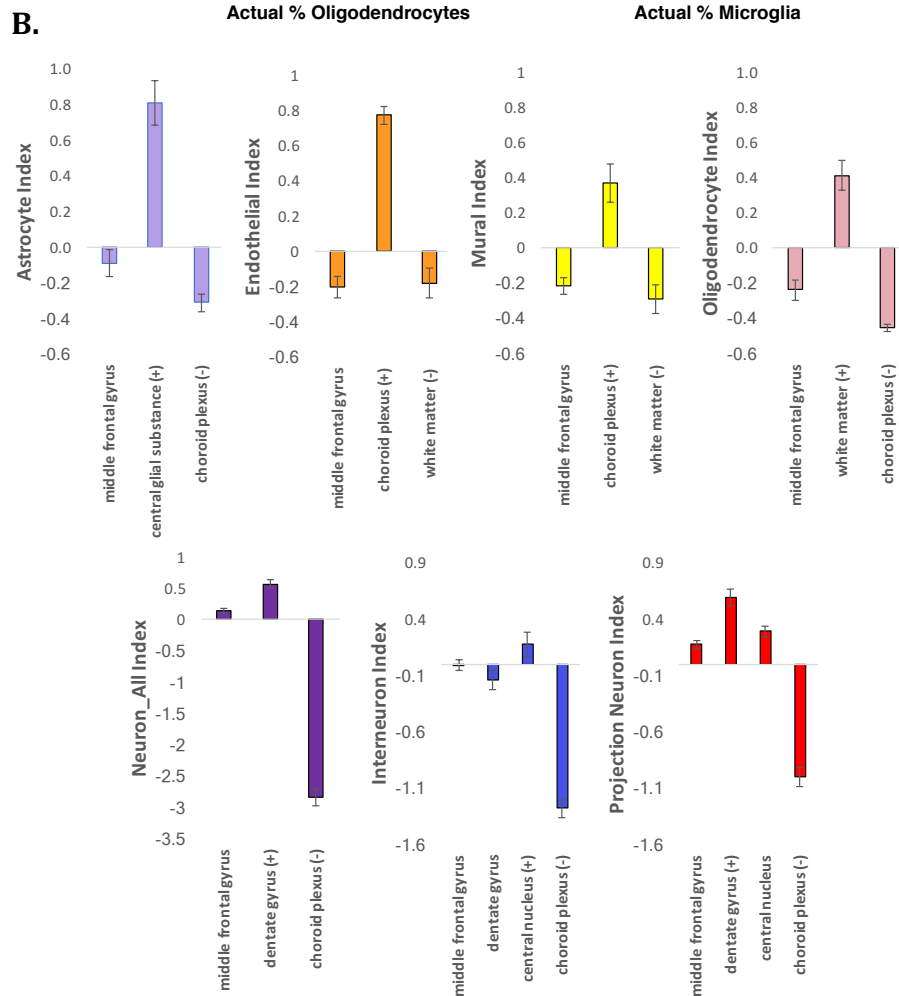

164 **Figure 3. Validation of Relative Cell Content Predictions.** *A) Using a microarray dataset derived from*  
165 *samples that contained artificially-generated mixtures of cultured cells (GSE19380; (12)), we found that*  
166 *our relative cell content predictions (“cell type indices”) closely reflected actual known content. B) Our*  
167 *cell type indices also easily differentiated human post-mortem samples derived from brain regions that*  
168 *are known to contain relatively more (+) or less (-) of the targeted the cell type of interest. Results from*  
169 *the middle frontal gyrus are included for comparison, since the rest of the paper primarily focuses on*  
170 *prefrontal cortical data. (Bars: average +/-SE).*

171

## 172 **2.4 Validation of Relative Cell Content Predictions Using a Dataset Derived from Human Post-**

### 173 **Mortem Tissue**

174 Next, we wanted to see whether the cell content predictions produced by BrainInABlender  
175 correctly reflected relative cell type balance in human post-mortem samples. To test this, we applied our  
176 method to a large human post-mortem Agilent microarray dataset (841 samples) spanning 160 cortical  
177 and subcortical brain regions from the Allen Brain Atlas (**Suppl. Table 2**; (25)). This dataset was derived  
178 from high-quality tissue (absence of neuropathology, pH>6.7, post-mortem interval<31 hrs, RIN>5.5)  
179 from 6 human subjects (26). The tissue samples were collected using a mixture of block dissection and  
180 laser capture microscopy guided by adjacent tissue sections histologically stained to identify traditional  
181 anatomical boundaries (27). Prior to data release, the dataset had been subjected to a wide variety of  
182 normalization procedures to eliminate technical variation (28) which included log(base2) transformation,  
183 centering and scaling for each probe (<http://human.brain-map.org/microarray/search>, December 2015).

184 After applying BrainInABlender to the dataset, we extracted the results for a selection of brain  
185 regions that are known to contain relatively more (+) or less (-) of particular cell types (the results for the  
186 other brain regions can be found in **Suppl. Table 3**). The results clearly indicated that our cell type  
187 analyses could identify well-established differences in cell type balance across brain regions (**Figure 3**).  
188 Within the choroid plexus, which is a villous structure located in the ventricles made up of support cells  
189 (epithelium) and an extensive capillary network (29), there was an elevation of gene expression specific  
190 to vasculature (endothelial cells, mural cells). In the corpus callosum and cingulum bundle, which are  
191 large myelinated fiber tracts (29), there was an enrichment of oligodendrocytes- and microglia-specific  
192 gene expression. The central glial substance was enriched with gene expression specific to glia and

193 support cells, with a particular emphasis on astrocytes. The dentate gyrus, which contains densely packed  
194 glutamatergic granule cells projecting to the mossy fibre pathway (30), was enriched for gene expression  
195 specific to projection neurons. The central nucleus of the amygdala, which includes a large number of  
196 GABA-ergic neurons (31), had a slight enrichment of gene expression specific to interneurons. These  
197 results provide fundamental validation that our methodology can accurately predict relative cell type  
198 balance in human post-mortem samples. Moreover, these results suggest that each of the consolidated cell  
199 type indices is capable of generally tracking their respective cell types in subcortical structures, despite  
200 the fact that our analysis method relies on cell type specific genes originally identified in the forebrain  
201 and cortex.

202

## 203 **2.5 Using Cell Type Specific Transcripts to Predict Relative Cell Content in Transcriptomic Data** 204 **from Macro-Dissected Human Cortical Tissue from Psychiatric Subjects**

205 Next, we examined the collective variation in the levels of cell type specific transcripts in several  
206 large psychiatric human brain microarray datasets. The first was a large Pritzker Consortium Affymetrix  
207 U133A microarray dataset derived from high-quality human post-mortem dorsolateral prefrontal cortex  
208 samples (final sample size of 157 subjects, **Suppl. Table 14**), including tissue from subjects without a  
209 psychiatric or neurological diagnosis (“Controls”, n=71), or diagnosed with Major Depressive Disorder  
210 (“MDD”, n=40), Bipolar Disorder (“BP”, n=24), or Schizophrenia (“Schiz”, n= 22). The severity and  
211 duration of physiological stress at the time of death was estimated by calculating an agonal factor score  
212 for each subject (ranging from 0-4, with 4 representing severe physiological stress; (32,33)). Additionally,  
213 we measured the pH of cerebellar tissue as an indicator of the extent of oxygen deprivation experienced  
214 around the time of death (32,33) and calculated the interval between the estimated time of death and the  
215 freezing of the brain tissue (the postmortem interval or PMI) using coroner records. The transcriptional  
216 profiling of these samples had originally been processed in batches across multiple laboratories (1-5  
217 replicates per sample). Before averaging the replicate samples for each subject, the data was highly  
218 normalized to correct for technical variation, including robust multi-array analysis (RMA) (34) and

## Running Head: PREDICTING CELL TYPE BALANCE

219 median-centering (detailed procedure: (35)). Our current analyses began with this subject-level summary  
220 gene expression data (GSE92538).

221 We determined the replicability of our results using three smaller publicly-available post-mortem  
222 human cortical Affymetrix U133Plus2 microarray datasets (GSE53987 (36), GSE21935 (37), GSE21138  
223 (38), **Figure 4**). These datasets were selected because they included both psychiatric and control samples,  
224 and provided pH, PMI, age, and gender in the demographic information on the Gene Expression Omnibus  
225 website (<https://www.ncbi.nlm.nih.gov/geo/>). To control for technical variation, the sample processing  
226 batches were estimated using the microarray chip scan dates extracted from the .CEL files and RNA  
227 degradation was estimated using the R package AffyRNADegradation (39). Prior to running  
228 BrainInABlender, the probe-level signal data from each dataset was normalized using RMA (34),  
229 summarized using a custom .cdf ([http://nmg-r.bioinformatics.nl/NuGO\\_R.html](http://nmg-r.bioinformatics.nl/NuGO_R.html),  
230 “hgu133plus2hsentrezgcdf\_19.0.0”), and cleaned of any samples that appeared low-quality or  
231 misidentified.

232 Finally, we also explored replicability within the recently-released large CommonMind  
233 Consortium (CMC) human dorsolateral prefrontal cortex RNA-seq dataset (603 individuals (40)). This  
234 dataset was downloaded from the CommonMind Consortium Knowledge Portal  
235 (<https://www.synapse.org/CMC>) and analyzed at UCI. The bam files were converted to fastq files and re-  
236 mapped to a more recent build of the human genome (GRCh38, (41)). The total reads mapping uniquely  
237 to exons (defined by Ensembl) were transformed into logCPM values (42). Prior to data upload, poor  
238 quality samples from the original dataset (40) were removed (<50 million reads, RIN<5.5) by the CMC  
239 and replaced with higher quality samples. We additionally excluded data from 10 replicates and 89  
240 individuals with incomplete demographic data (missing pH), leaving a final sample size of 514 samples.  
241 We predicted the relative cell type content of these samples using a newer version of BrainInABlender  
242 (v2) which excluded a few of the weaker cell type specific gene sets (15). Later, the expression data were  
243 further filtered by expression threshold (CPM>1 in at least 50 individuals), leaving data from  
244 approximately 17,000 genes.

245 In general, the code for all analyses in the paper can be found at <https://github.com/hagenaue/> or  
 246 [https://github.com/aschulmann/CMC\\_celltype\\_index](https://github.com/aschulmann/CMC_celltype_index).

247

**Microarray:**

| GEO Accession # | Submitter & Date    | Published?            | Brain Bank | Brain Region      | Sample Size (no outliers) | Subjects per group (no outliers)       | # of replicates per sample | # of known Batches | AVE pH (+/- SD) | AVE Age (+/- SD) | AVE PMI (+/- SD) | % Female |
|-----------------|---------------------|-----------------------|------------|-------------------|---------------------------|----------------------------------------|----------------------------|--------------------|-----------------|------------------|------------------|----------|
| GSE92538        | Hagenaue (2016)     | <i>current paper</i>  | UC-Irvine  | BA9/BA46          | 337                       | 157: 71 CNTRL, 24 BP, 40 MDD, 22 SCHIZ | 1-5 (AVE: 2)               | 15-36              | 6.8 (+/-0.3)    | 52 (+/-15)       | 24 (+/-9)        | 27%      |
| GSE53987        | Lanz (2014)         | Lanz et al. (2015)    | PITT       | BA46: grey matter | 66                        | 66: 18 CNTRL, 17 BP, 17 MDD, 14 SCHIZ  | 1                          | 0                  | 6.6 (+/-0.3)    | 46 (+/-10)       | 20 (+/-6)        | 45%      |
| GSE21935        | Huxley-Jones (2011) | Barnes et al. (2011)  | CCHPC      | BA22              | 42                        | 42: 19 CNTRL, 23 SCHIZ                 | 1                          | 2                  | 6.3 (+/-0.3)    | 70 (+/-19)       | 8 (+/-5)         | 45%      |
| GSE21138        | Thomas (2010)       | Narayan et al. (2008) | MHRI       | BA46: grey matter | 54                        | 54: 27 CNTRL, 27 SCHIZ                 | 1                          | 5                  | 6.3 (+/-0.2)    | 45 (+/-17)       | 40 (+/-13)       | 17%      |

**RNA-Seq:**

| Public Data Release | Submitter & Date | Published?           | Brain Bank       | Brain Region                   | Sample Size (all) | Subjects per group (all)              | # of replicates per sample | # of known Batches | AVE pH (+/- SD) | AVE Age (+/- SD)         | AVE PMI (+/- SD) | % Female |
|---------------------|------------------|----------------------|------------------|--------------------------------|-------------------|---------------------------------------|----------------------------|--------------------|-----------------|--------------------------|------------------|----------|
| Synapse.org         | CMC (2016)       | Fromer et al. (2016) | MSSM, PENN, PITT | BA9 / BA46 (PITT: grey matter) | 621               | 603: 285 CNTRL, 263 SCZ, 47 BP, 8 AFF | 1 (rarely 2)               | 491                | 6.5 (+/- 0.3)   | 65 (+/- 18) (binned 90+) | 17 +/- 11        | 41%      |

248

249 **Figure 4. We examined the pattern of cell-type specific gene expression in five post-mortem human**  
 250 **cortical tissue datasets that included samples from subjects with psychiatric illness. Abbreviations:**  
 251 **CTRL: control, BP: Bipolar Disorder, MDD: Major Depressive Disorder, SCHIZ: Schizophrenia, GEO:**  
 252 **Gene Expression Omnibus, BA: Brodmann's Area, PMI: Post-mortem interval, SD: Standard Deviation,**  
 253 **Brain Banks: UC-Irvine (University of California – Irvine), PITT (University of Pittsburgh), CCHPC**  
 254 **(Charing Cross Hospital Prospective Collection), MSSM (Mount Sinai Icahn School of Medicine), MHRI**  
 255 **(Mental Health Research Institute Australia), PENN (University of Pennsylvania)**

256

257 **2.6 Does the Reference Dataset Matter? Cell Type Specific Transcripts Identified by Different**  
 258 **Publications Produce Similar Predictions of Relative Cell Type Balance**

259 We first confirmed that the predicted cell content for our post-mortem human cortical samples  
 260 (“cell type indices”) was similar regardless of the methodology used to generate the cell type specific  
 261 gene lists used in the predictions. Within all five of the human cortical transcriptomic datasets, there was  
 262 a strong positive correlation between cell type indices representing the same cell type, even when the  
 263 predictions were derived using cell type specific gene lists from different species, cell type purification

264 strategies, and platforms. Clustering within broad cell type categories was clear using visual inspection of  
265 the correlation matrices (**Suppl. Figure 11, Suppl. Figure 12**), hierarchical clustering, or consensus  
266 clustering (**Suppl. Figure 13**, ConsensusClusterPlus: (43), **Suppl. Figure 14, Suppl. Figure 16**). In some  
267 datasets, the cell type indices for support cell subcategories were nicely clustered and in others they were  
268 difficult to fully differentiate (**Suppl. Figure 11, Suppl. Figure 12**). Clustering was not able to reliably  
269 discern neuronal subcategories (interneurons, projection neurons) in any dataset. Similar to our previous  
270 validation analyses, oligodendrocyte progenitor cell indices derived from different publications did not  
271 strongly correlate with each other, perhaps due to heterogeneity in the progenitor cell types sampled by  
272 the original publications.

273         Therefore, for further analyses in the post-mortem human datasets, we consolidated the cell type  
274 indices using a procedure similar to our previous validation analyses. To do this, we averaged the 38  
275 publication-specific cell type indices within each of ten primary categories: astrocytes, endothelial cells,  
276 mural cells, microglia, immature and mature oligodendrocytes, red blood cells, interneurons, projection  
277 neurons, and indices derived from neurons in general, with any transcripts that overlapped between  
278 categories removed (**Suppl. Figure 17**). This led to ten consolidated primary cell-type indices for each  
279 sample.

280

### 281 **3. Results**

282

#### 283 **3.1 Inferred Cell Type Composition Explains a Large Percentage of the Sample-Sample Variability** 284 **in Microarray Data from Macro-Dissected Human Cortical Tissue**

285         Using principal components analysis we found that the primary gradients of variation in all four  
286 of the cortical datasets strongly correlated with our estimates of cell type balance. For example, while  
287 analyzing the Pritzker dorsolateral prefrontal cortex microarray dataset, we found that the first principal  
288 component, which encompassed 23% of the variation in the dataset, spanned from samples with high

## Running Head: PREDICTING CELL TYPE BALANCE

289 support cell content to samples with high neuronal content. Therefore, a large percentage of the variation  
290 in PC1 (91%) was accounted for by an average of the astrocyte and endothelial indices ( $p < 2.2e-82$ , with a  
291 respective r-squared of 0.80 and 0.75 for each index analyzed separately) or by the general neuron index  
292 ( $p < 6.3e-32$ , r-squared=0.59; **Figure 5**). The second notable gradient in the dataset (PC2) encompassed  
293 12% of the variation overall, and spanned samples with high projection neuron content to samples with  
294 high oligodendrocyte content (with a respective r-squared of 0.62 and 0.42, and respective p-values of  
295  $p < 8.5e-35$  and  $p < 8.7e-20$ ).

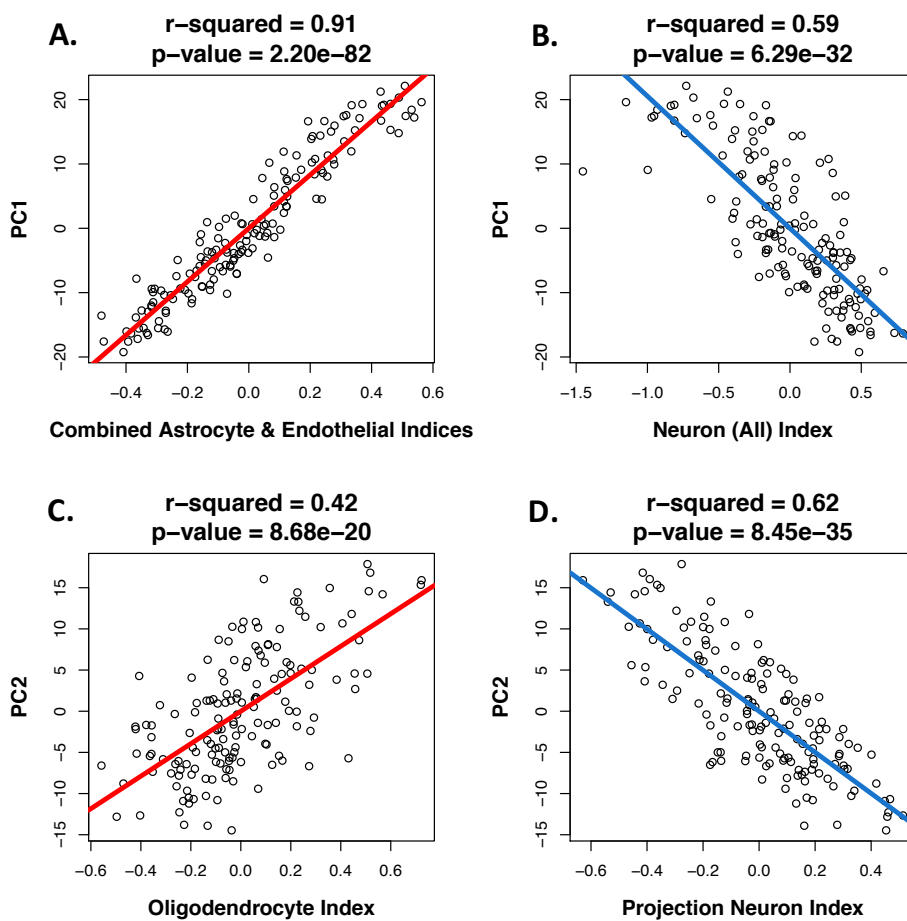

296

297 **Figure 5. Cell content predictions explain a large percentage of the variability in microarray data**  
298 **derived from the human cortex.** As an example, within the Pritzker dataset the first principal component  
299 of variation (PC1) encompassed 23% of the variation in the dataset, and was A) positively correlated  
300 with predicted “support cell” content in the samples (a combination of the astrocyte and endothelial  
301 indices: r-squared: 0.91,  $p < 2.2e-82$ ) and B) negatively correlated with predicted neuronal content (r-  
302 squared=0.59,  $p < 6.3e-32$ ). The second principal component of variation (PC2) encompassed 12% of  
303 variation in the dataset, and was C) positively correlated with predicted oligodendrocyte content in the



## Running Head: PREDICTING CELL TYPE BALANCE

304 *samples (r-squared: 0.42,  $p < 8.7e-20$ ) and D) negatively correlated with predicted projection neuron*  
305 *content (r-squared: 0.62,  $p < 8.5e-35$ ). Examples in other datasets can be found in **Suppl. Figure 20**.*

306  
307       When digging deeper, we found that none of the original 38 publication-specific cell type indices  
308 were noticeably superior to the consolidated indices when predicting the principal components of  
309 variation in the dataset. Human-derived indices did not outperform mouse-derived indices, and indices  
310 derived from studies using stricter definitions of cell type specificity (fold enrichment cut-off in **Figure 1**,  
311 e.g., (13) vs. (17)) did not outperform less strict indices.

312       Within the other four human cortical tissue datasets, the relationships between the top principal  
313 components of variation and the consolidated cell type indices were similarly strong (**Suppl. Figure 20**),  
314 despite the fact that these datasets had received less preprocessing to remove the effects of technical  
315 variation. Within the GSE21935 dataset (published in (37)) the first principal component of variation  
316 accounted for 37% of the variation in the dataset and similarly seemed to represent a gradient running  
317 from samples with high support cell content (PC1 vs. endothelial index: r-squared= 0.85,  $p < 3.6e-18$ , PC1  
318 vs. astrocyte index: r-squared= 0.67,  $p < 3.6e-11$ ) to samples with high neuronal content (PC1 vs.  
319 neuron\_all index: r-squared= 0.85,  $p < 3.9e-18$ ). Within the GSE53987 dataset (submitted to GEO by  
320 Lanz, 2014), which had samples derived exclusively from gray-matter-only dissections, the first principal  
321 component of variation accounted for 13% of the variation in the dataset and was highly correlated with  
322 predicted astrocyte content (PC1 vs. astrocyte index: r-squared=0.80,  $p < 4.6e-24$ ). In GSE21138  
323 (published in (39)), which also had samples derived exclusively from gray-matter-only dissections, the  
324 first principal component of variation accounted for 23% of the variation in the dataset and was strongly  
325 related to technical variation (batch), but the second principal component of variation, which accounted  
326 for 14% of the variation in the dataset, again represented a gradient from samples with high support cell  
327 content to high neuronal content (PC2 vs. astrocyte: r-squared=0.56,  $p < 8.3e-11$ , PC2 vs. neuron\_all: r-  
328 squared=0.54,  $p < 2.3e-10$ ). Finally, within the CMC RNA-Seq dataset, the first principal component of  
329 variation accounted for 16% of the variation in the dataset and was highly correlated with projection  
330 neuron content (PC1 vs. Neuron\_Projection: r-squared=0.54,  $p = 5.77e-104$ ).

331 To confirm that the strong relationship between the top principal components of variation and our  
332 cell type composition indices did not originate artificially due to cell type specific genes representing a  
333 large percentage of the most highly variable transcripts in the dataset, we repeated the principal  
334 components analysis in the Pritzker dataset after excluding all cell type specific transcripts from the  
335 dataset and still found these strong correlations (**Suppl. Figure 21**). Indeed, individual cell type indices  
336 better accounted for the main principal components of variation in the microarray data than *all other*  
337 *major subject variables combined* (pH, Agonal Factor, PMI, Age, Gender, Diagnosis, Suicide; PC1: R-  
338 squared=0.4272, PC2: R-squared=0.2176). When examining the dataset as a whole, the six subject  
339 variables accounted for an average of only 12% of the variation for any particular probe (R-squared,  
340 Adj.R-squared=0.0715), whereas just the astrocyte and projection neuron indices alone were able to  
341 account for 17% (R-squared, Adj.R-squared=0.1601) and all 10 cell types accounted for an average of  
342 31% (R-squared, Adj.R-squared=0.263), almost one third of the variation present in the data for any  
343 particular probe (**Suppl. Figure 22**).

344 These results indicated that accounting for cell type balance is important for the interpretation of  
345 post-mortem human brain microarray and RNA-Seq data and might improve the signal-to-noise ratio in  
346 analyses aimed at identifying psychiatric risk genes.

### 347 **3.2 Cell Content Predictions Derived from Microarray Data Match Known Relationships Between** 348 **Clinical/Biological Variables and Brain Tissue Cell Content**

349 We next set out to observe the relationship between the predicted cell content of our samples and  
350 a variety of medically-relevant subject variables, including variables that had already been demonstrated  
351 to alter cell content in the brain in other paradigms or animal models. To perform this analysis, we first  
352 examined the relationship between seven relevant subject variables and each of the ten cell type indices in  
353 the Pritzker prefrontal cortex dataset using a linear model that allowed us to simultaneously control for  
354 other likely confounding variables in the dataset:

355 **Equation 1:**

## Running Head: PREDICTING CELL TYPE BALANCE

356 Cell Type Index=  $\beta_0 + \beta_1 * (\text{Brain pH}) + \beta_2 * (\text{Agonal Factor})$   
357  $+ \beta_3 * (\text{PMI}) + \beta_4 * (\text{Age}) + \beta_5 * (\text{Sex}) + \beta_6 * (\text{Diagnosis}) + \beta_7 * (\text{Exsanguination}) + \epsilon$   
358

359 We then examined the replicability of these relationships using data from the three smaller  
360 publicly-available human post-mortem microarray datasets (GSE53987, GSE21935, GSE21138). For  
361 these datasets, we initially lacked detailed information about manner of death (agonal factor and  
362 exsanguination), but were able to control for technical variation within the model using statistical  
363 estimates of RNA degradation and batch (scan date):

364 **Equation 2:**

365 Cell Type Index=  $\beta_0 + \beta_1 * (\text{Brain pH}) + \beta_2 * (\text{PMI}) + \beta_3 * (\text{Age}) + \beta_4 * (\text{Sex}) + \beta_5 * (\text{Diagnosis}) +$   
366  $\beta_6 * (\text{RNA Degradation}) + \beta_7 * (\text{Batch, when applicable}) + \epsilon$

367 We evaluated the replicability of these relationships across the four microarray datasets by performing a  
368 meta-analysis for each variable and cell type combination. To do this, we applied random effects  
369 modeling to the respective betas and accompanying sampling variance derived from each dataset using  
370 the *rma.mv()* function within the *metafor* package (44). P-values were then corrected for multiple  
371 comparisons following the Benjamini-Hochberg method (*q-value*) using the *mt.rawp2adjp* function  
372 within the *multtest* package (45).

373 Finally, we characterized these relationships in the large CMC human post-mortem RNA-Seq  
374 dataset. For this dataset, we had some information about manner of death but lacked knowledge of agonal  
375 factor or exsanguination. We controlled for technical variation due to dissection site (institution) and  
376 RNA degradation (RIN):

377 **Equation 3:**

378 Cell Type Index=  $\beta_0 + \beta_1 * (\text{Brain pH}) + \beta_2 * (\text{PMI}) + \beta_3 * (\text{Age}) + \beta_4 * (\text{Sex}) + \beta_5 * (\text{Diagnosis}) +$   
379  $\beta_6 * (\text{RNA Degradation}) + \beta_7 * (\text{Institution}) + \beta_8 * (\text{MannerOfDeath}) + \epsilon$   
380

381 This analysis uncovered many well-known relationships between brain tissue cell content and clinical  
382 or biological variables (**Figure 6, Suppl. Table 4**). First, as a proof of principle, we were able to clearly

## Running Head: PREDICTING CELL TYPE BALANCE

383 observe dissection differences between institutions within the large CMC RNA-Seq dataset, with samples  
384 from University of Pittsburgh having a predicted relative cell type balance that closely matched what  
385 would be expected due to their gray matter only dissection method (Oligodendrocyte:  $\beta = -0.404$ ,  $p = 2.42e-11$ ,  
386  $q = 4.03e-10$ ; Microglia:  $\beta = -0.274$ ,  $p = 3.06e-05$ ,  $q = 2.42e-04$ ; Neuron\_Interneuron:  $\beta = 0.0916$ ,  
387  $p = 0.0161$ ,  $q = 0.525$ ; Neuron\_Projection:  $\beta = 0.145$ ,  $p = 2.31e-05$ ,  $q = 1.93e-04$ ; Mural:  $\beta = 0.170$ ,  $p = 2.14e-08$ ,  
388  $q = 2.68e-07$ ; Endothelial:  $\beta = 0.200$ ,  $p = 1.12e-05$ ,  $q = 1.12e-04$ ). Samples from University of Pennsylvania  
389 were associated with lower predicted cell content related to vasculature (Endothelial:  $\beta = -0.255$ ,  $p = 4.01e-04$ ,  
390  $q = 2.40e-03$ ; Mural:  $\beta = -0.168$ ,  $p = 4.59e-04$ ,  $q = 2.59e-03$ ; Astrocyte:  $\beta = -0.189$ ,  $p = 7.47e-03$ ,  $q = 0.0287$ ).

391 Predicted cell type content was also closely related to manner of death. For example, within the  
392 Pritzker dataset we found that subjects who died in a manner that involved exsanguination had a notably  
393 low red blood cell index ( $\beta = -0.398$ ;  $p = 0.00056$ ). Later, we were able to replicate this result within  
394 GSE21138 using data from 5 subjects who we discovered were also likely to have died in a manner  
395 involving exsanguination ( $\beta = -0.516$ ,  $p = 0.052$  \**trend*, manner of death reported in suppl. in (38)). The  
396 presence of prolonged hypoxia around the time of death, as indicated by either low brain pH or high  
397 agonal factor score within the Pritzker dataset, was associated with a large increase in the endothelial cell  
398 index (Agonal Factor:  $\beta = 0.118$ ,  $p = 2.85e-07$ ; Brain pH:  $\beta = -0.210$ ,  $p = 0.0003$ ) and astrocyte index (Brain  
399 pH:  $\beta = -0.437$ ,  $p = 2.26e-07$ ; Agonal Factor:  $\beta = 0.071$ ,  $p = 0.024$ ), matching previous demonstrations of  
400 cerebral angiogenesis, endothelial and astrocyte activation and proliferation in low oxygen environments  
401 (46). Small increases were also seen in the mural index in response to low-oxygen (Mural vs. Agonal  
402 Factor:  $\beta = 0.0493493$ ,  $p = 0.0286$ ), most likely reflecting angiogenesis. In contrast, prolonged hypoxia  
403 was associated with a clear decrease in all of the neuronal indices (Neuron\_All vs. Agonal Factor:  $\beta = -$   
404  $0.242$ ,  $p = 3.58e-09$ ; Neuron\_All vs. Brain pH:  $\beta = 0.334$ ,  $p = 0.000982$ ; Neuron\_Interneuron vs. Agonal  
405 Factor:  $\beta = -0.078$ ,  $p = 4.13e-05$ ; Neuron\_Interneuron vs. Brain pH:  $\beta = 0.102$ ,  $p = 0.034$ ; Neuron\_Projection  
406 vs. Agonal Factor:  $\beta = -0.096$ ,  $p = 0.000188$ ), mirroring the notorious vulnerability of neurons to low  
407 oxygen (e.g., (47)). These overall effects of hypoxia on cell type balance replicated in the smaller human  
408 microarray post-mortem datasets, despite lack of information about agonal factor (Astrocyte vs. Brain pH

## Running Head: PREDICTING CELL TYPE BALANCE

409 (meta-analysis:  $b = -0.459$ ,  $p = 2.59 \times 10^{-11}$ ,  $q = 2.33 \times 10^{-9}$ ): Narayan et al. 2008:  $\beta = -0.856$ ,  $p = 0.00661$ , Lanz  
410 2014:  $\beta = -0.461$ ,  $p = 0.00812$ , Neuron\_All vs. Brain pH (meta-analysis:  $b = 0.245$ ,  $p = 7.72 \times 10^{-4}$ ,  $q = 1.16 \times 10^{-2}$ ), Neuron\_Interneuron vs. Brain pH (meta-analysis:  $b = 0.109$ ,  $p = 7.89 \times 10^{-3}$ ,  $q = 5.52 \times 10^{-2}$  \**trend*): Narayan  
411 et al. 2008:  $\beta = 0.381134$ ,  $p = 0.0277$ ) and partially replicated in the CMC human RNA-Seq dataset  
412 (Neuron\_Interneuron vs. Brain pH:  $\beta = 0.186$ ,  $p = 9.81 \times 10^{-5}$ ,  $q = 6.69 \times 10^{-4}$ ). In several datasets, we also found  
413 that prolonged hypoxia correlated with fewer microglia (Microglia vs. Brain pH: Lanz 2014:  $\beta = 0.462$ ,  
414  $p = 0.00603$ ; CMC:  $\beta = 0.286$ ,  $p = 4.66 \times 10^{-4}$ ,  $q = 2.59 \times 10^{-3}$ ), which may suggest that our microglia cell type  
415 index is specifically tracking ramified microglia, although we did not observe a relationship between  
416 microglia and death related to infection/parasitic disease (CMC: Microglia vs. CauseOfDeath(infection):  
417  $\beta = 0.231$ ,  $p = 0.121$ ,  $q = 0.256$ ).  
418  
419

## Running Head: PREDICTING CELL TYPE BALANCE

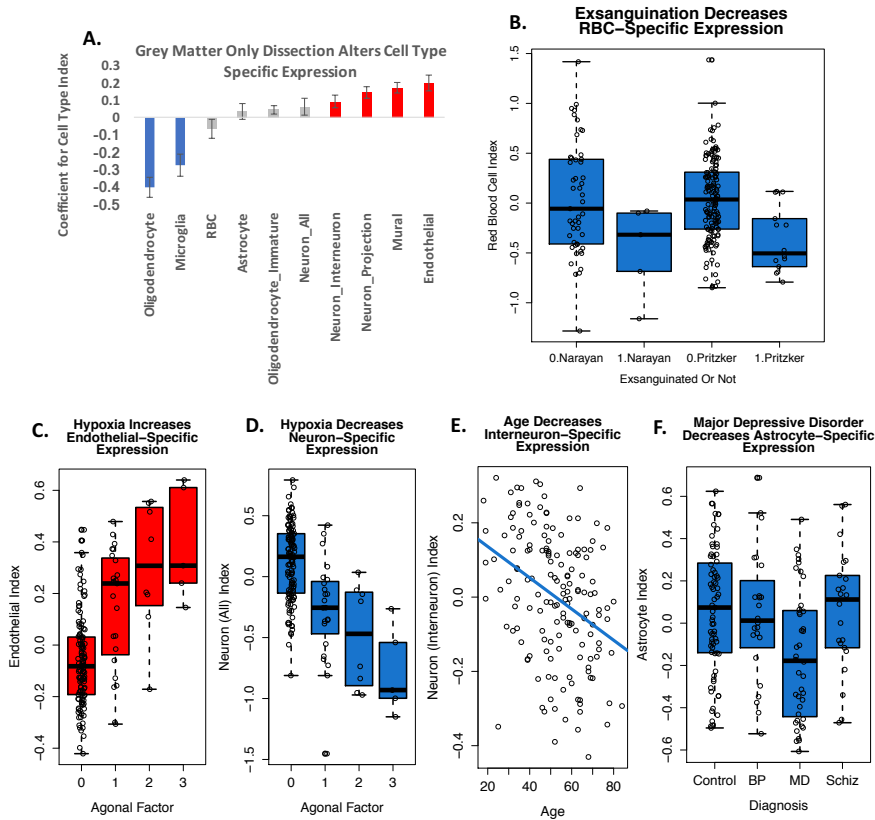

| The most highly replicated effects across datasets: | Pritzker | Lanz 2014 | Barnes et al. 2011 | Narayan et al. 2008 | Meta-Analysis: Nominal P-value | Meta-Analysis: BH Adjusted P-value | CMCC  | CMCC: Nominal P-value | CMCC: BH Adjusted P-value | Replication in Microarray Meta-analysis and CMCC |
|-----------------------------------------------------|----------|-----------|--------------------|---------------------|--------------------------------|------------------------------------|-------|-----------------------|---------------------------|--------------------------------------------------|
| <b>Hypoxia:</b>                                     |          |           |                    |                     |                                |                                    |       |                       |                           |                                                  |
| Astrocyte vs. Brain pH                              | -5.4     | -2.7      | -1.1               | -2.9                | 2.59E-11                       | 2.33E-09                           | 2.1   | 3.25E-02              | 9.55E-02                  |                                                  |
| Neuron_All vs. Brain pH                             | 3.4      | 0.1       | 1.3                | 1.9                 | 7.72E-04                       | 1.16E-02                           | 0.6   | 5.60E-01              | 7.00E-01                  | *                                                |
| Neuron_Interneuron vs. Brain pH                     | 2.1      | 1.0       | -0.5               | 2.3                 | 7.89E-03                       | 5.52E-02                           | 3.9   | 9.81E-05              | 6.69E-04                  | **                                               |
| Microglia vs. Brain pH                              | -1.0     | 2.9       | -0.1               | 1.9                 | 5.41E-01                       | 7.91E-01                           | 3.5   | 4.66E-04              | 2.59E-03                  | *                                                |
| Oligodendrocyte_Immature vs. Brain pH               | -3.0     | 0.4       | -0.5               | 1.4                 | 1.40E-01                       | 3.71E-01                           | 3.0   | 2.68E-03              | 1.22E-02                  |                                                  |
| <b>Age</b>                                          |          |           |                    |                     |                                |                                    |       |                       |                           |                                                  |
| Neuron_All vs. Age                                  | -1.9     | -2.1      | -1.2               | -1.2                | 1.57E-03                       | 2.02E-02                           | -4.3  | 2.27E-05              | 1.93E-04                  | **                                               |
| Neuron_Interneuron vs. Age                          | -3.4     | -0.5      | -2.5               | -2.5                | 2.91E-06                       | 6.56E-05                           | -6.5  | 2.10E-10              | 3.15E-09                  | **                                               |
| Neuron_Projection vs. Age                           | -2.8     | -3.7      | -0.5               | -3.1                | 1.61E-06                       | 4.83E-05                           | -7.5  | 2.93E-13              | 7.33E-12                  | **                                               |
| Oligodendrocyte vs. Age                             | 1.8      | 1.2       | 0.3                | 3.1                 | 2.74E-03                       | 2.74E-02                           | 1.6   | 1.02E-01              | 2.25E-01                  | *                                                |
| Oligodendrocyte_Immature vs. Age                    | -3.7     | -4.7      | -0.2               | -4.5                | 5.98E-11                       | 2.69E-09                           | -11.0 | 3.32E-25              | 2.49E-23                  | **                                               |
| <b>PMI</b>                                          |          |           |                    |                     |                                |                                    |       |                       |                           |                                                  |
| Oligodendrocyte vs. PMI                             | -3.6     | -3.6      | -1.6               | -0.5                | 2.23E-05                       | 4.02E-04                           | -4.1  | 4.70E-05              | 3.36E-04                  | **                                               |
| Endothelial vs. PMI                                 | -2.0     | -0.8      | 0.4                | -0.1                | 5.51E-02                       | 2.36E-01                           | -3.9  | 1.32E-04              | 8.60E-04                  | *                                                |
| Microglia vs. PMI                                   | -1.0     | -1.5      | -1.2               | -0.7                | 9.72E-02                       | 3.05E-01                           | -3.5  | 5.15E-04              | 2.76E-03                  | *                                                |
| Oligodendrocyte_Immature vs. PMI                    | 3.5      | 1.0       | 1.6                | -0.4                | 4.81E-03                       | 4.33E-02                           | -0.4  | 6.86E-01              | 8.04E-01                  |                                                  |
| Neuron_Projection vs. PMI                           | 3.9      | 1.6       | -0.2               | -1.2                | 2.28E-03                       | 2.56E-02                           | 3.1   | 1.97E-03              | 9.24E-03                  | **                                               |
| Neuron_All vs. PMI                                  | 2.5      | 1.8       | -0.4               | 0.0                 | 1.74E-02                       | 9.81E-02                           | 2.6   | 1.10E-02              | 3.88E-02                  | *                                                |
| <b>Diagnosis:</b>                                   |          |           |                    |                     |                                |                                    |       |                       |                           |                                                  |
| Astrocyte vs. Diagnosis_MDD                         | -2.6     | -1.0      |                    |                     | 5.88E-03                       | 4.81E-02                           |       |                       |                           |                                                  |
| Neuron_All vs. Diagnosis_BP                         | -0.9     | -0.7      |                    |                     | 2.46E-01                       | 5.39E-01                           | 2.6   | 8.44E-03              | 3.17E-02                  |                                                  |
| RBC vs. Diagnosis_Schiz                             | -1.2     | 0.1       | -1.0               | -0.5                | 2.04E-01                       | 4.96E-01                           | -2.5  | 1.41E-02              | 4.71E-02                  | *                                                |
| <b>Gender:</b>                                      |          |           |                    |                     |                                |                                    |       |                       |                           |                                                  |
| Neuron_Interneuron vs. GenderFemale                 | -0.9     | 0.0       | 0.7                | 0.3                 | 6.65E-01                       | 9.06E-01                           | -2.5  | 1.20E-02              | 4.09E-02                  |                                                  |
| Neuron_Projection vs. GenderFemale                  | 1.0      | -0.3      | -0.4               | 1.6                 | 3.60E-01                       | 6.46E-01                           | -2.5  | 1.11E-02              | 3.88E-02                  |                                                  |

421 **Figure 6. Cell content predictions derived from microarray data match known relationships between**  
422 **subject variables and brain tissue cell content.** Boxplots represent the median and interquartile range,  
423 with whiskers illustrating either the full range of the data or 1.5x the interquartile range. A. Within the  
424 CMC dataset, cortical tissue samples that were dissected to only contain gray matter (PITT) show lower  
425 predicted oligodendrocyte and microglia content and more neurons and vasculature (bars:  $\beta \pm SE$ ,  
426 red/blue:  $p < 0.05$ ). B. Subjects that died in a manner that involved exsanguination ( $n=14$ ) had a notably  
427 low red blood cell index in both the Pritzker ( $p=0.00056$ ) and Narayan et al. datasets ( $p=0.052$ \*trend).  
428 C. The presence of prolonged hypoxia around the time of death, as indicated by high agonal factor score,  
429 was associated with a large increase in the endothelial cell index ( $p=2.85e-07$ ) matching previous  
430 demonstrations of cerebral angiogenesis, activation, and proliferation in low oxygen environments (46).  
431 D. High agonal factor was also associated with a clear decrease in neuronal indices ( $p=3.58e-09$ )  
432 mirroring the vulnerability of neurons to low oxygen (47). E. Age was associated with a decrease in the  
433 neuronal indices ( $p=0.000956$ ) which fits known decreases in gray matter density in the frontal cortex in  
434 aging humans (48). F. Major Depressive Disorder was associated with a moderate decrease in astrocyte  
435 index ( $p=0.0118$ ), which fits what has been observed morphometrically (49). G. The most highly-  
436 replicated relationships between subject variables and predicted cortical tissue cell content across all five  
437 of the post-mortem human datasets. Provided in the table are the T-stats for the effects  
438 (red=upregulation, blue=downregulation), derived from a larger linear model controlling for confounds  
439 (**Equation 1, Equation 2, Equation 3**), as well as the nominal p-values from the meta-analysis of the  
440 results across the four microarray studies, and p-values following multiple-comparisons correction (q-  
441 value). Only effects that had a  $q < 0.05$  in either our meta-analysis or the large CMC RNA-Seq dataset are  
442 included in the table. Asterisks denote effects that had consistent directionality in the meta-analysis and  
443 CMC dataset (\*) or consistent directionality and  $q < 0.05$  in both datasets (\*\*). Please note that lower pH  
444 and higher agonal factor are both indicators of greater hypoxia prior to death, but have an inverted  
445 relationship and therefore show opposing relationships with the cell type indices (e.g., when pH is low  
446 and agonal factor is high, support cell content is increased).

447  
448 In the Pritzker dataset, age was associated with a moderate decrease in two of the neuronal indices  
449 (Neuron\_Interneuron vs. Age:  $\beta = -0.00291$ ,  $p = 0.000956$ ; Neuron\_Projection Neuron vs. Age:  $\beta =$   
450  $0.00336$ ,  $p = 0.00505$ ) and was strongly replicated in the large CMC RNA-Seq dataset (Neuron\_All vs.  
451 Age:  $\beta = -0.00497$ ,  $p = 2.27e-05$ ,  $q = 1.93e-04$ ; Neuron\_Projection Neuron vs. Age:  $\beta = -0.00612$ ,  $p = 2.93e-13$ ,  
452  $q = 7.33e-12$ ; Neuron\_Interneuron vs. Age:  $\beta = -0.00591$ ,  $p = 2.10e-10$ ,  $q = 3.15e-09$ ). A similar decrease in  
453 predicted neuronal content was seen in all three of the smaller human post-mortem datasets (Neuron\_All  
454 vs. Age (meta-analysis:  $b = -0.00415$ ,  $p = 1.57e-03$ ,  $q = 2.02e-02$ ): Lanz 2014:  $\beta = -0.00722$ ,  $p = 0.0432$ ,  
455 Neuron\_Interneuron vs. Age (meta-analysis:  $b = -0.00335$ ,  $p = 2.91e-06$ ,  $q = 6.56e-05$ ): Narayan et al. 2008:  
456  $\beta = -0.00494$ ,  $p = 0.0173$ , Barnes et al. 2011:  $\beta = -0.00506$ ,  $p = 0.0172$ , Neuron\_Projection vs. Age (meta-  
457 analysis:  $b = -0.00449$ ,  $p = 1.61e-06$ ,  $q = 4.83e-05$ ): Lanz 2014:  $\beta = -0.0103$ ,  $p = 0.000497$ , Narayan et al.  
458 2008:  $\beta = -0.00763$ ,  $p = 0.00386$ ). This result fits with known decreases in gray matter density in the frontal  
459 cortex in aging humans (48), as well as age-related sub-region specific decreases in frontal neuron



## Running Head: PREDICTING CELL TYPE BALANCE

460 numbers in primates (50) and rats (51). There was also a consistent decrease in immature  
461 oligodendrocytes in relationship to age across datasets (Oligodendrocyte\_Immature vs. Age (meta-  
462 analysis:  $b=-0.00514$ ,  $p=5.98e-11$ ,  $q=2.69e-09$ ): Pritzker:  $\beta=-0.00432$ ,  $p=0.000354$ , Narayan et al. 2008:  
463  $\beta=-0.00721$ ,  $p=5.73e-05$ , Lanz 2014:  $\beta=-0.00913$ ,  $p=1.85e-05$ ; CMCC:  $\beta=-0.00621$ ,  $p=3.32e-25$ ,  
464  $q=2.49e-23$ ), which seems intuitive, but actually contradicts animal studies on the topic (52). Since the  
465 validation of the Oligodendrocyte\_Immature index was relatively weak, this result should perhaps be  
466 considered with caution.

467 Other non-canonical relationships between subject variables and predicted cell content can be found  
468 in the tables in **Figure 6**. In some datasets, there appears to be an increase in oligodendrocyte index with  
469 age (Oligodendrocyte vs. Age (meta-analysis:  $b=0.00343$ ,  $p=2.74e-03$ ,  $q=2.74e-02$ ): Narayan et al. 2008,  
470  $\beta=0.00957$ ,  $p=0.00349$ ) which, at initial face value, seems to contrast with well-replicated observations  
471 that frontal white matter decreases with age in human imaging studies (48,53,54). However, it is worth  
472 noting that several histological studies in aging primates suggest that brain regions that are experiencing  
473 demyelination with age actually show an *increasing* number of oligodendrocytes, which is thought to be  
474 driven by the need for repair (52,55).

475 Another prominent unexpected effect was a large decrease in the oligodendrocyte index with longer  
476 post-mortem interval (Oligodendrocyte vs. PMI (meta-analysis:  $b=-0.00764$ ,  $p=2.23e-05$ ,  $4.02e-04$ ):  
477 Pritzker:  $\beta=-0.00749$ ,  $p=0.000474$ , Lanz 2014:  $\beta=-0.0318$ ,  $p=0.000749$ ; CMC:  $\beta=-0.00759$ ,  $p=4.70e-05$ ,  
478  $q=3.36e-04$ ). Upon further investigation, we found a publication documenting a 52% decrease in the  
479 fractional anisotropy of white matter with 24 hrs post-mortem interval as detected by neuroimaging (56),  
480 but to our knowledge the topic is otherwise not well studied. These changes were paralleled by a decrease  
481 in endothelial cells (CMC:  $\beta=-0.00542$ ,  $p=1.32e-04$ ,  $q=8.60e-04$ ) and microglia (CMC:  $\beta=-0.00710$ ,  
482  $p=5.15e-04$ ,  $q=2.76e-03$ ) and relative increase in immature oligodendrocytes (Oligodendrocyte\_Immature  
483 vs. PMI (meta-analysis:  $b=0.00353$ ,  $p=4.81e-03$ ,  $q=4.33e-02$ ): Pritzker:  $\beta=0.00635$ ,  $p=0.000683$ ) and  
484 neurons (Neuron\_All vs. PMI: Pritzker:  $\beta=0.006997$ ,  $p=0.000982$ ; CMC:  $\beta=0.00386$ ,  $p=0.0110$ ,  
485  $q=0.0388$ ; Neuron\_Projection vs. PMI (meta-analysis:  $b=0.00456$ ,  $p=2.28e-03$ ,  $q=2.56e-02$ ): Pritzker:



486  $\beta = 0.00708$ ,  $p = 1.64 \times 10^{-4}$ ; CMC:  $\beta = 0.00331$ ,  $p = 0.00197$ ,  $q = 0.00924$ ). This result could arise from the  
487 zero-sum nature of microarray analysis: due to the use of a standardized dissection size, RNA  
488 concentration, and data normalization, if there are large decreases in gene expression for one common  
489 variety of cell type in relationship to post-mortem interval (oligodendrocytes), then gene expression  
490 related to other cell types may appear increase.

491 Overall, these results indicate that statistical predictions of the cell content of samples effectively  
492 capture many known biological changes in cell type balance, and imply that within both chronic (age) and  
493 acute conditions (agonal, PMI, pH) there is substantial influences upon the relative representation of  
494 different cell types. Thus, when interpreting microarray data, it is as important to consider the chronic and  
495 acute demographic factors at the population level as well as cellular functional regulation.

496

### 497 **3.3 Cell Type Balance Changes in Response to Psychiatric Diagnosis**

498 Of most interest to us were potential changes in cell type balance in relation to psychiatric illness. In  
499 previous post-mortem morphometric studies, there was evidence of glial loss in the prefrontal cortex of  
500 subjects with Major Depressive Disorder, Bipolar Disorder, and Schizophrenia (reviewed in (57)). This  
501 decrease in glia, and particularly astrocytes, was replicated experimentally in animals exposed to chronic  
502 stress (58), and when induced pharmacologically, was capable of driving animals into a depressive-like  
503 condition (58). Replicating the results of (49), we observed a moderate decrease in astrocyte index in the  
504 prefrontal cortex of subjects with Major Depressive Disorder (meta-analysis:  $b = -0.132$ ,  $p = 5.88 \times 10^{-3}$ ,  
505  $q = 4.81 \times 10^{-2}$ , Pritzker:  $\beta = -0.133$ ,  $p = 0.0118$ , **Figure 6f**), but did not see similar changes in the brains of  
506 subjects with Bipolar Disorder or Schizophrenia. We also observed a decrease in red blood cell index in  
507 association with Schizophrenia (CMC:  $\beta = -0.104$ ,  $p = 0.0141$ ,  $q = 0.0471$ ) which is tempting to ascribe to  
508 reduced blood flow due to hypofrontality (59). This decrease in red blood cell content could also arise due  
509 to psychiatric subjects having an increased probability of dying a violent death, but the effect remained  
510 present when we controlled for exsanguination, therefore the effect is likely to be genuinely tied to the  
511 illness itself.

512

### 513 3.4 Discriminating Between Changes in Cell Type Balance and Cell-Type Specific Function

514 Gray matter density has been shown to decrease in the frontal cortex in aging humans (48), and  
515 frontal neuron numbers decrease in specific subregions in aging primates (50) and rats (51). However,  
516 many scientists would argue that age-related decreases in gray matter are primarily driven by synaptic  
517 atrophy instead of decreased cell number (60). This raised the question of whether the decline that we saw  
518 in neuronal cell indices with age was being largely driven by the enrichment of genes related to synaptic  
519 function in the index. More generally, it raised the question of how well cell type indices could  
520 discriminate changes in cell number from changes in cell-type function.

521 We examined this question using two methods. First, we specifically examined the relationship  
522 between age and the functional annotation for genes found in the Neuron\_All index in more depth. To do  
523 this, we evaluated the relationship between age and gene expression in the Pritzker dataset while  
524 controlling for likely confounds using the signal data for all probesets in the dataset:

#### 525 *Equation 4:*

$$526 \text{ Gene Expression (Probeset Signal) = } \\ 527 \beta_0 + \beta_1 * (\text{Diagnosis}) + \beta_2 * (\text{Brain pH}) + \beta_3 * (\text{Agonal Factor}) + \beta_4 * (\text{PMI}) + \beta_5 * (\text{Age}) + \beta_6 * (\text{Sex}) + \varepsilon \\ 528$$

529 We used “DAVID: Functional Annotation Tool” ([//david.ncifcrf.gov/summary.jsp](http://david.ncifcrf.gov/summary.jsp), (61,62) to  
530 identify the functional clusters that were overrepresented by the genes included in our neuronal cell type  
531 indices (using the full HT-U133A chip as background), and then determined the average effect of age  
532 (beta) for the genes included in each of the 240 functional clusters (**Suppl. Table 5**). The vast majority of  
533 these functional clusters showed a negative relationship with age on average (**Suppl. Figure 13**).  
534 However, these functional clusters overrepresented dendritic/axonal related functions, so in a manner that  
535 was blind to the results, we identified 29 functional clusters that were clearly related to dendritic/axonal  
536 functions and 41 functional clusters that seemed distinctly unrelated to dendritic/axonal functions (**Suppl.**  
537 **Table 5**). Using this approach, we found that transcripts from both classifications of functional clusters  
538 showed an average decrease in expression with age (dendritic/axonal:  $T(28) = -4.5612$ ,  $p = 9.197e-05$ , non-

## Running Head: PREDICTING CELL TYPE BALANCE

539 dendritic/axonal:  $T(40)=-2.7566$ ,  $p=0.008756$ ), but the decrease was larger for transcripts associated with  
540 dendritic/axonal-related functions ( $T(50.082)=2.3385$ ,  $p=0.02339$ , **Suppl. Figure 23**). Based on this  
541 analysis, we conclude that synaptic atrophy could be partially driving age-related effects on neuronal cell  
542 type indices in the human prefrontal cortex dataset but are unlikely to fully explain the relationship.

543 Next, we decided to make the process of differentiating between altered cell type-specific functions  
544 and relative cell type balance more efficient. We used our cell type specific gene lists to construct gene  
545 sets in a file format (.gmt) compatible with the popular tool Gene Set Enrichment Analysis (63,64) and  
546 combined them with two other commonly-used gene set collections from the molecular signatures  
547 database (MSigDB: <http://software.broadinstitute.org/gsea/msigdb/index.jsp>, downloaded 09/2017, “C2:  
548 Curated Gene Sets” and “C5: GO Gene Sets”, **Suppl. Table 6**). Then we tested the utility of  
549 incorporating our new gene sets into GSEA (fGSEA: (65)) using the ranked results (betas) for the  
550 relationship between each subject variable (**Equation 4**) and each probeset in the Pritzker dataset. Using  
551 this method, we could compare the enrichment of the effects of subject variables within gene sets defined  
552 by brain cell type to the enrichment seen within gene sets for other functional categories. In general, we  
553 found that gene sets for brain cell types tended to be the top result (most extreme normalized enrichment  
554 score, NES) for each of the subject variables that showed a strong relationship with cell type in our  
555 previous analyses (Agonal Factor vs. “Neuron\_All\_Cahoy\_JNeuro\_2008”: NES=-2.46,  $p=0.00098$ ,  $q=$   
556  $0.012$ , Brain pH vs. “Astrocyte\_All\_Cahoy\_JNeuro\_2008”: NES=-2.48,  $p=0.0011$ ,  $q=0.014$ , MDD vs.  
557 “Astrocyte\_All\_Cahoy\_JNeuro\_2008”: NES= -2.60,  $p=0.0010$ ,  $q=0.017$ , PMI vs.  
558 “GO\_OLIGODENDROCYTE\_DIFFERENTIATION”: NES=-2.42,  $p=0.00078$ ,  $q=0.027$ ; **Suppl. Table**  
559 **7**). Similarly, the relationship between the effects of age and neuron-specific gene expression was ranked  
560 #4, following the gene sets “GO\_SYNAPTIC\_SIGNALING”,  
561 “REACTOME\_TRANSMISSION\_ACROSS\_CHEMICAL\_SYNAPSES”,  
562 “REACTOME\_OPIOID\_SIGNALLING”, but each of them was assigned a similar p-value ( $p=0.001$ ) and  
563 adjusted p-value ( $q=0.036$ ). We conclude that it is important to consider cell type-specific expression  
564 during the analysis of macro-dissected brain microarray data above and beyond the consideration of

565 specific functional pathways, and have submitted our .gmt files to the Broad Institute for potential  
566 addition to their curated gene sets in MSigDB to promote this form of analysis.

567

### 568 **3.5 Including Cell Content Predictions in the Analysis of Microarray Data Improves Model Fit And** 569 **Enhances the Detection of Diagnosis-Related Genes in Some Datasets**

570 Over the years, many researchers have been concerned that transcriptomic and genomic analyses  
571 of psychiatric disease often produce non-replicable or contradictory results and, perhaps more  
572 disturbingly, are typically unable to replicate well-documented effects detected by other methods. We  
573 posited that this lack of sensitivity and replicability might be partially due to cell type variability in the  
574 samples, especially since such a large percentage of the principal components of variation in our samples  
575 were explained by neuron to glia ratio. Within the Pritzker dataset, we were particularly interested in  
576 controlling for cell type variability, because there were indications that dissection might have differed  
577 between technical batches that were unevenly distributed across diagnosis categories (**Figure 8, Suppl.**  
578 **Figure 10**). There was a similarly uneven distribution of dissection methods across diagnosis categories  
579 within the large CMC RNA-Seq dataset. In this dataset, the majority of the bipolar samples (75%) were  
580 collected by a brain bank that performed gray matter only dissections (PITT), whereas the control and  
581 schizophrenia samples were more evenly distributed across all three institutions (40).

582 We hypothesized that controlling for cell type while performing differential expression analyses  
583 in these datasets would improve our ability to detect previously-documented psychiatric effects on gene  
584 expression, especially psychiatric effects on gene expression that were previously-identified within  
585 individual cells, since these effects on gene expression should not be mediated by psychiatric changes in  
586 overall cell type balance. To test the hypothesis, we first compiled a list of 130 strong, previously-  
587 documented relationships between Schizophrenia or Psychosis and gene expression in particular cell  
588 types in the human cortex, as detected by in situ hybridization or immunocytochemistry (reviewed further  
589 in (19); GAD1: (66–68); RELN:(66); SST: (69), SLC6A1 (GAT1): (70), PVALB:(67), *suicide*: HTR2A  
590 (71)), or by single-cell type laser capture microscopy (**Figure 7, Suppl. Table 8** (1,72,73)).

Running Head: PREDICTING CELL TYPE BALANCE

| Validation Datasets:                                             | # of Genes | Method:                                                 | Brain Bank:                                                  | # of Subjects | Brain Region            | Co-Variates: Controlled?                                                    | Co-Variates: Balanced?                            | Statistical Stringency                                                               |
|------------------------------------------------------------------|------------|---------------------------------------------------------|--------------------------------------------------------------|---------------|-------------------------|-----------------------------------------------------------------------------|---------------------------------------------------|--------------------------------------------------------------------------------------|
| <b>Schizophrenia Effects in Particular Cortical Cell Types:</b>  |            |                                                         |                                                              |               |                         |                                                                             |                                                   |                                                                                      |
| Reviewed in Lewis & Sweet (2009)                                 | 7          | ICC/in situ hybridization                               | Variable, often PITT                                         | Variable      | Prefrontal cortex       | Variable                                                                    | Variable                                          | Variable                                                                             |
| Arion et al. (2015)                                              | 41         | LCM-Microarray: Pyramidal Neurons (Layers 3 & 5)        | PITT                                                         | 72            | BA9                     | Direction of effect evaluated, but covariates not included in final model.  | Sex, Age, PMI, pH, RIN, tissue storage time, race | Top 40 (FDR<0.1 in both layers, Table 2A), Top 2 in Table 2B, FDR<10E-17 for Layer5) |
| Pietersen et al. (2014)                                          | 47         | LCM-Microarray: PVALB Interneurons                      | HBTRC (MacLean)                                              | 16            | BA42                    | Batch. Considered effects of Sex, Age, PMI but not included in final model. | Sex, Age, PMI, pH not significantly different     | Top 47 (FDR<0.01, FC>2, Table 3)                                                     |
| Mauney et al. (2015)                                             | 35         | LCM-Microarray: Oligodendrocyte Precursors              | HBTRC (MacLean)                                              | 18            | BA9                     | None                                                                        | Sex, Age, PMI, pH not reported                    | Top 35 (FDR<0.001, Table S2)                                                         |
| <b>Psychiatric Effects in Macro-dissected Prefrontal Cortex:</b> |            |                                                         |                                                              |               |                         |                                                                             |                                                   |                                                                                      |
| Mistry et al. (2013)                                             | 126        | Meta-analysis of microarray data: Schizophrenia effects | Stanley Foundation, HBTRC (MacLean), PITT, CCHPC, MSSM, MHRI | 306           | BA9, BA10, BA46         | Model selection procedure included Batch, Age, pH, Study                    | Sex, PMI                                          | FDR<0.1 (Table S2)                                                                   |
| Choi et al. (2011)                                               | 367        | Meta-analysis of microarray data: Bipolar effects       | Stanley Foundation                                           | 83            | BA46 (grey matter only) | Batch (Scan Date), pH, Psychosis, Medication at TOD                         | Age, BMI, PMI not reported                        | FDR<0.05, FC>1.3 (Table S1)                                                          |

591

592 **Figure 7. Gene lists used to assess whether controlling for cell type while performing differential**  
 593 **expression analyses enhances the detection of previously-documented psychiatric effects on cortical**  
 594 **gene expression. These lists include genes with documented relationships to psychiatric illness in either**  
 595 **1) particular cortical cell types or 2) macro-dissected cortex. The full lists can be found in *Suppl. Table***  
 596 **8. Abbreviations: LCM: Laser Capture Microscopy, PVALB: Parvalbumin, BA: Brodmann's Area, PMI:**  
 597 **Post-mortem interval, FDR: False detection ratio (or q-value), Brain Banks: PITT (University of**  
 598 **Pittsburgh), HBTRC (Harvard Brain Resource Tissue Center), CCHPC (Charing Cross Hospital**  
 599 **Prospective Collection), MSSM (Mount Sinai Icahn School of Medicine), MHRI (Mental Health Research**  
 600 **Institute Australia).**

601 As a comparison, we also considered lists of transcripts strongly-associated with Schizophrenia  
 602 (74) and Bipolar Disorder (75) in meta-analyses of microarray data derived from human frontal cortical  
 603 tissue (**Figure 7**). The effects of psychiatric illness on the expression of these transcripts could be  
 604 mediated by either psychiatric effects on cell type balance or by effects within individual cells. Therefore,  
 605 controlling for cell type balance while performing differential expression analyses could detract from the  
 606 detection of some psychiatric effects, but perhaps also enhance the detection of other psychiatric effects  
 607 by controlling for large, confounding sources of noise (*e.g.*, dissection variability).

608 Next, we examined our ability to detect these previously-documented psychiatric effects using  
 609 regression models of increasing complexity (**Figure 8 B**), including a simple base model containing just

## Running Head: PREDICTING CELL TYPE BALANCE

610 the variable of interest (“Model 1”), a standard model controlling for traditional co-variates (“Model 2”),  
611 and a model controlling for traditional co-variates as well as each of the cell type indices (“Model 5”:  
612 **Equation 5**). We also used two reduced models that only included the most prevalent cell types  
613 (Astrocyte, Microglia, Oligodendrocyte, Neuron\_Interneuron, Neuron\_Projection; (21)) to avoid issues  
614 with multicollinearity. The first of these models included traditional co-variates as well (“Model 4”),  
615 whereas the second model excluded them (“Model 3”).

## Running Head: PREDICTING CELL TYPE BALANCE

### A. Diagnosis Effects May Be Partially Confounded By Dissection Variability

| Pritzker: |             |
|-----------|-------------|
| Samples   | Batch*      |
| Control   | All Batches |
| BP, MDD   | 1-4, 9-13   |
| Schiz     | 5-8, 13-15  |

| CMC:     |                        |
|----------|------------------------|
| Samples  | Institution*           |
| Controls | All (PITT, MSSM, PENN) |
| BP       | PITT, MSSM             |
| Schiz    | All (PITT, MSSM, PENN) |

\*Batches partially defined by subject cohort \*PITT was a grey matter only dissection

| B. Model Complexity |                                                                  |
|---------------------|------------------------------------------------------------------|
| M1                  | <b>Base Model:</b> Diagnosis Only                                |
| M2                  | <b>Standard Model:</b> Diagnosis + Traditional Co-variables      |
| M3                  | Diagnosis + Most Prevalent Cell Types                            |
| M4                  | Diagnosis + Traditional Co-variables + Most Prevalent Cell Types |
| M5                  | Diagnosis + Traditional Co-variables + All Cell Types            |

### C. All Expressed Genes: Model Fit Improves After Adding Cell Type

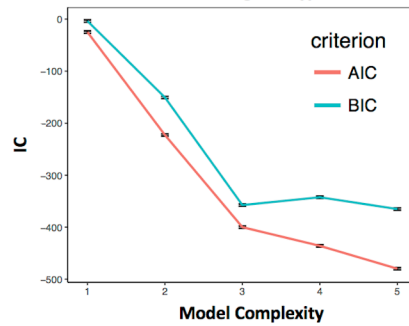

### D. Genes with Previously-Identified Psychiatric Effects: Model Fit Improves After Adding Cell Type

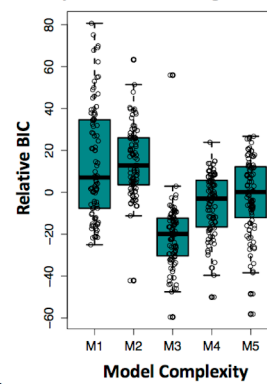

### E. Controlling for Cell Type Variability Enhances Detection of Psychiatric Effects in Some Datasets

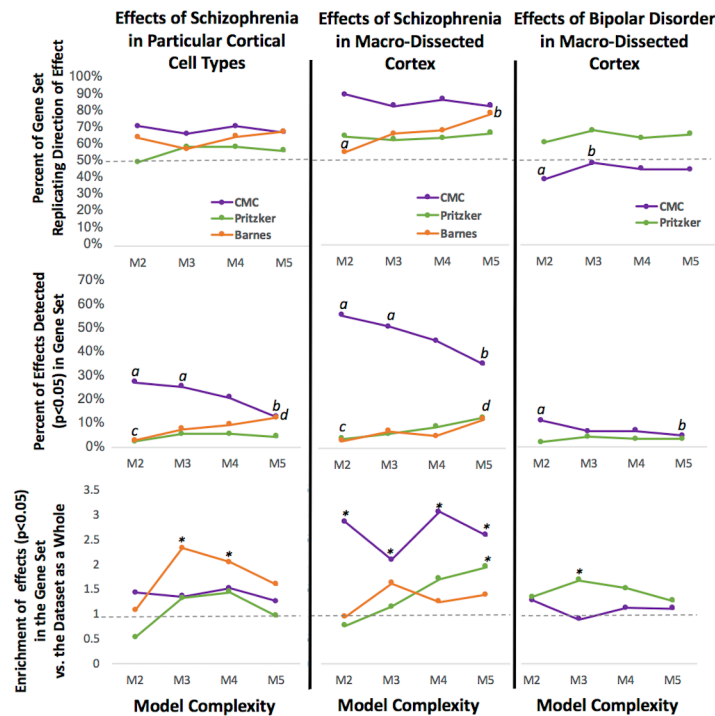



617 **Figure 8. Including Cell Content Predictions in the Analysis of Microarray Data Improves Model Fit**  
618 **and Enhances the Detection of Previously-Identified Diagnosis-Related Genes in Some Datasets. A.**  
619 *Diagnosis effects were likely to be partially confounded by dissection variability within the Pritzker and*  
620 *CMC datasets. B: We examined a series of differential expression models of increasing complexity,*  
621 *including a base model (M1), a standard model (M2), and three models that included cell type co-*  
622 *variates (M3-M5). C. Model fit improved with the addition of cell type (M1/M2 vs. M3-M5) when*  
623 *examining all expressed genes in the dataset (example from CMC: points= AVE +/-SE). D. Model fit*  
624 *improved with the addition of cell type (M1/M2 vs. M3-M5) when examining genes with previously-*  
625 *documented relationships with psychiatric illness in particular cell types (example from Pritzker: BIC*  
626 *values for all models for each gene were centered prior to analysis). Boxplots represent the median and*  
627 *interquartile range, with whiskers illustrating either the full range of the data or 1.5x the interquartile*  
628 *range. E. Evaluating the replication of previously-detected psychiatric effects (Figure 7) in three datasets*  
629 *(Pritzker, CMC, and Barnes) using a standard differential expression model (M2) vs. models that include*  
630 *cell type co-variates (M3-5). Top graphs: The percentage of genes (y-axis: 0-1) replicating the direction*  
631 *of previously-documented psychiatric effects on cortical gene expression sometimes increases with the*  
632 *addition of cell type to the model (Barnes (effects of Schiz): M2 vs. M5, CMC (effects of Bipolar*  
633 *Disorder): M2 vs. M3). Middle graphs: The detection of previously-identified psychiatric effects on gene*  
634 *expression (p<0.05 & replicated direction of effect) increases with the addition of cell type to the model*  
635 *in some datasets (Barnes: M2 vs. M5, Pritzker: M2 vs. M5) but decreases in others (CMC: M2 vs. M5,*  
636 *M3 vs. M5). Bottom graphs: In some datasets we see an enrichment of psychiatric effects (p<0.05) in*  
637 *previously-identified psychiatric gene sets only after controlling for cell type (Barnes: M3, M4, Pritzker:*  
638 *M5, M3). For the CMC dataset, we see an enrichment using all models. The full results for all models can*  
639 *be found in Suppl. Table 9, Suppl. Table 10, Suppl. Table 11, Suppl. Table 12, and Suppl. Table 13.*

640

641 **Equation 5: A model of gene expression for each dataset, colored to illustrate the subcomponents**  
642 **evaluated during our model comparison (#M1-M5). The base model (intercept and variable of interest)**  
643 **is presented in green, the typical subject variable covariates included in a standard model are blue, the**  
644 **cell type indices for the most prevalent cell types are colored red, and the remaining cell type indices are**  
645 **in purple. Model components unique to each dataset are underlined.**

646 **The Pritzker microarray dataset:**

647 Gene Expression (Probeset Signal) =  
648  $\beta_0 + \beta_1 * (\text{The variable of interest: Diagnosis})$   
649  $+ \beta_2 * (\text{Brain pH}) + \beta_3 * (\text{PMI}) + \beta_4 * (\text{Age}) + \beta_5 * (\text{Sex}) + \beta_6 * (\text{Agonal Factor}) +$   
650  $+ \beta_7 * (\text{Astrocyte}) + \beta_8 * (\text{Oligodendrocyte}) + \beta_9 * (\text{Microglia}) + \beta_{10} * (\text{Interneuron}) + \beta_{11} * (\text{ProjectionNeuron})$   
651  $+ \beta_{12} * (\text{Endothelial}) + \beta_{13} * (\text{Neuron\_All}) + \beta_{14} * (\text{Oligodendrocyte\_Immature}) + \beta_{15} * (\text{Mural}) + \beta_{16} * (\text{RBC}) + \epsilon$

652 **The CMC RNA-Seq dataset:**

653 Gene Expression (Probeset Signal) =  
654  $\beta_0 + \beta_1 * (\text{The variable of interest: Diagnosis})$   
655  $+ \beta_2 * (\text{Brain pH}) + \beta_3 * (\text{PMI}) + \beta_4 * (\text{Age}) + \beta_5 * (\text{Sex}) + \beta_6 * (\text{RIN}) + \beta_7 * (\text{Institution}) + \beta_8 * (\text{CauseOfDeath}) +$   
656  $+ \beta_9 * (\text{Astrocyte}) + \beta_{10} * (\text{Oligodendrocyte}) + \beta_{11} * (\text{Microglia}) + \beta_{12} * (\text{Interneuron}) + \beta_{13} * (\text{ProjectionNeuron})$   
657  $+ \beta_{14} * (\text{Endothelial}) + \beta_{15} * (\text{Neuron\_All}) + \beta_{16} * (\text{Oligodendrocyte\_Immature}) + \beta_{17} * (\text{Mural}) + \beta_{18} * (\text{RBC}) + \epsilon$   
658

659 **The smaller microarray datasets (GSE53987, GSE21935, GSE21138):**

660 Gene Expression (Probeset Signal) =  
661  $\beta_0 + \beta_1 * (\text{The variable of interest: Diagnosis})$   
662  $+ \beta_2 * (\text{Brain pH}) + \beta_3 * (\text{PMI}) + \beta_4 * (\text{Age}) + \beta_5 * (\text{Sex}) + \beta_6 * (\text{RNA Degradaion}) +$   
663  $+ \beta_7 * (\text{Astrocyte}) + \beta_8 * (\text{Oligodendrocyte}) + \beta_9 * (\text{Microglia}) + \beta_{10} * (\text{Interneuron}) + \beta_{11} * (\text{ProjectionNeuron})$



664  $+\beta_{12}*(\text{Endothelial})+\beta_{13}*(\text{Neuron\_All})+\beta_{14}*(\text{Oligodendrocyte\_Immature})+\beta_{15}*(\text{Mural})+\beta_{16}*(\text{RBC})+ \epsilon$

665

666 We found that including predictions of cell type balance in our models assessing the effect of  
667 diagnosis on gene expression dramatically improved model fit as assessed by Akaike's Information  
668 Criterion (AIC) or Bayesian Information Criterion (BIC) (**Figure 8**). These improvements were largest  
669 with the addition of the five most prevalent cell types to the model (M3, M4); the addition of less  
670 common cell types produced smaller gains (M5). These improvements were clear whether we considered  
671 the average model fit for all expressed genes (*e.g.*, **Figure 8B**) or just genes with previously-identified  
672 psychiatric effects (*e.g.*, **Figure 8C**).

673 However, models that included cell type were not necessarily superior at replicating previously-  
674 observed psychiatric effects on gene expression (**Figure 7**), even when examining psychiatric effects that  
675 were likely to be independent of changes in cell type balance. For each model, we quantified the  
676 percentage of genes replicating the previously-observed direction of effect in relationship to psychiatric  
677 illness, as well as the percentage of genes that replicated the effect using a common threshold for  
678 detection ( $p<0.05$ ). Finally, we also looked at the enrichment of psychiatric effects ( $p<0.05$ ) in each of the  
679 previously-documented psychiatric gene sets in comparison to the other genes in our datasets. For this  
680 analysis, to improve comparisons across datasets, we defined the statistical background for enrichment  
681 using genes universally represented in all three datasets (Pritzker, CMC, Barnes).

682 In general, we found that the two datasets that had the most variability in gene expression related  
683 to cell type (Pritzker, Barnes: **Results 3.1**) were more likely to replicate previously-documented  
684 psychiatric effects on gene expression when the differential expression model included cell type  
685 covariates. For example, in the Barnes dataset, adding cell type co-variates to the model increased our  
686 ability to detect effects of Schizophrenia that had been previously documented within particular cell types  
687 or macro-dissected tissue (**Figure 8E**, Fisher's exact test: M2 vs. M5,  $p<0.05$  in both gene sets).  
688 Similarly, adding cell type co-variates to the model allowed us to see a significant enrichment of  
689 Schizophrenia effects ( $p<0.05$ ) in genes with previously-documented psychiatric effects in particular cell

## Running Head: PREDICTING CELL TYPE BALANCE

690 types (Fisher's exact test  $p < 0.05$ : M3 & M4). In the Pritzker dataset, we saw that adding cell type co-  
691 variates to the model increased our ability to detect previously-documented effects of Schizophrenia in  
692 macrodissected tissue (M2 vs. M5:  $p < 0.05$ ). Likewise, adding cell type co-variates to the model allowed  
693 us to see a significant enrichment of Schizophrenia and Bipolar effects ( $p < 0.05$ ) in genes with previously-  
694 documented psychiatric effects in macro-dissected tissue (Fisher's exact test  $p < 0.05$ : Schizophrenia: M5,  
695 Bipolar: M3). This mirrored the results of another analysis that we had conducted suggesting that  
696 controlling for cell type increased the overlap between the top diagnosis results in the Pritzker dataset and  
697 previous findings in the literature as a whole (**Suppl. Figure 24, Suppl. Figure 25**).

698 In the large CMC RNA-Seq dataset, the rate of replication of previously-documented effects of  
699 Schizophrenia was already quite high using a standard differential expression model containing traditional  
700 co-variates (M2). Using a standard model, we could detect 27% of the previously-documented effects in  
701 cortical cell types and 55% of the previously-documented effects in macro-dissected tissue (with a  
702 replicated direction of effect and  $p < 0.05$ ). However, in contrast to what we had observed in the Pritzker  
703 and Barnes datasets, controlling for cell type seemed to actually *diminish* the ability to detect effects of  
704 Schizophrenia that had been previously-observed within particular cell types or macrodissected tissue in a  
705 manner that scaled with the number of co-variates included in the model (M2 or M3 vs. M5:  $p < 0.05$  for  
706 both gene sets), despite improvements in model fit parameters and a lack of significant relationship  
707 between Schizophrenia and any of the prevalent cell types (**Section 3.3**). Including cell type co-variates in  
708 the model did not improve our ability to observe a significant enrichment of Schizophrenia effects in  
709 genes with previously-documented psychiatric effects in macro-dissected tissue – this enrichment was  
710 present in the results from all differential expression models (Fisher's exact test  $p < 0.05$ : M2-M5). In  
711 contrast, controlling for cell type slightly improved the replication of the direction of previously-  
712 documented Bipolar Disorder effects (Fisher's exact test: M2 vs. M3:  $p < 0.05$ ) in a manner that would  
713 seem appropriate due to the highly uneven distribution of bipolar samples across institutions and  
714 dissection methods, but even after this improvement the rate of replication was still no better than chance  
715 (48%), and, counterintuitively, the ability to successfully detect those effects still diminished in a manner

716 that seemed to scale with the number of co-variates included in the model (Fisher's exact test: M2 vs. M5,  
717  $p < 0.05$ ). In a preliminary analysis of the two smaller human microarray datasets that were derived from  
718 gray-matter only dissections (GSE53987, GSE21138), the addition of cell type co-variates to differential  
719 expression models clearly diminished both the percentage of genes replicating the previously-documented  
720 direction of effect of Schizophrenia in particular cell types (Fisher's exact test: Narayan et al.: M2 vs. M4  
721 or M5:  $p < 0.05$ , Lanz et al.: M2 vs. M4 or M5) and the ability to successfully detect previously-  
722 documented effects (Fisher's exact test: Narayan et al.: M2 vs. M4 or M5:  $p < 0.05$ ).

723         Therefore, we conclude that the addition of cell type covariates to differential expression models  
724 is only recommended when there is a particularly large amount of variability in the dataset associated  
725 with cell type balance. For public use we have released the full results for each dataset analyzed using the  
726 different models discussed above (**Suppl. Table 9, Suppl. Table 10, Suppl. Table 11, Suppl. Table 12,**  
727 **and Suppl. Table 13**).

728

#### 729 **4. Discussion**

730         In this manuscript, we have demonstrated that the statistical cell type index is a relatively simple  
731 manner of interrogating cell-type specific expression in transcriptomic datasets from macro-dissected  
732 human brain tissue. We find that statistical estimations of cell type balance almost fully account for the  
733 top principal components of variation in microarray data derived from macro-dissected brain tissue  
734 samples, far surpassing the effects of traditional subject variables (post-mortem interval, hypoxia, age,  
735 gender). Indeed, our results suggest that many variables of medical interest are themselves accompanied  
736 by strong changes in cell type composition in naturally-observed human brains. We find that within both  
737 chronic (age, sex, diagnosis) and acute conditions (agonal, PMI, pH) there are substantial changes in the  
738 relative representation of different cell types. Thus, accounting for demography at the cellular population  
739 level is as important for the interpretation of microarray data as cell-level functional regulation. This form  
740 of data deconvolution was also useful for identifying the subtler effects of psychiatric illness within our

## Running Head: PREDICTING CELL TYPE BALANCE

741 samples, divulging the decrease in astrocytes that is known to occur in Major Depressive Disorder and the  
742 decrease in red blood cell content in the frontal cortex in Schizophrenia, resembling known fMRI  
743 hypofrontality. This form of data deconvolution may also aid in the detection of psychiatric effects while  
744 conducting differential expression analyses in datasets that have highly-variable cell content.

745         These results touch upon the fundamental question as to whether organ-level function responds to  
746 challenge by changing the biological states of individual cells (Lamarckian) or the life and death of  
747 different cell populations (Darwinian). To reach such a sweeping perspective in human brain tissue using  
748 classic cell biology methods would require epic efforts in labeling, cell sorting, and counting. We have  
749 demonstrated that you can approximate this vantage point using an elegant, supervised signal  
750 decomposition exploiting increasingly available genomic data. However, it should be noted that, similar  
751 to other forms of functional annotation, cell type indices are best treated as a hypothesis-generation tool  
752 instead of a final conclusion regarding tissue cell content. We have demonstrated the utility of cell type  
753 indices for detecting large-scale alterations in cell content in relationship with known subject variables in  
754 post-mortem tissue. We have not tested the sensitivity of the technique for detecting smaller effects or the  
755 validity under all circumstances or non-cortical tissue types. Likewise, while using this technique it is  
756 impossible to distinguish between alterations in cell type balance and cell-type specific transcriptional  
757 activity: when a sample shows a higher value of a particular cell type index, it could have a larger number  
758 of such cells, or each cell could have produced more of its unique group of transcripts, via a larger cell  
759 body, slower mRNA degradation, or an overall change in transcription rate. In this regard, the index that  
760 we calculate does not have a specific interpretation; rather it is a holistic property of the cell populations,  
761 the “neuron-ness” or “microglia-ness” of the sample. Such an abstract index represents the ecological  
762 shifts inferred from the pooled transcriptome. That said, unlike principal component scores or other  
763 associated techniques of removing unwanted variation from genomic data, our cell type indices do have  
764 real biological meaning - they can be interpreted in a known system of cell type taxonomy. When single-  
765 cell genomic data uncovers new cell types (e.g., the Allen Brain Atlas cellular taxonomy initiative (76))  
766 or meta-analyses refine the list of genes defined as having cell-type specific expression (e.g., (77)), our

## Running Head: PREDICTING CELL TYPE BALANCE

767 indices will surely evolve with these new classification frameworks, but the power of the approach will  
768 remain, in that we can disentangle the intrinsic changes of individual genes from the population-level  
769 shifts of major cell types.

770         We found that many variables of medical interest are accompanied by strong changes in cell type  
771 composition in naturally-observed human brains. One result from this analysis seems particularly worth  
772 discussing in greater depth. It has been acknowledged for a long time that exposure to a hypoxic  
773 environment prior to death has a huge impact on gene expression in human post-mortem brains (e.g.,  
774 (32,33,78–80)). This impact on gene expression is so large that up until recently the primary principal  
775 component of variation (PC1) in our Pritzker data was assumed to represent the degree of hypoxia, and  
776 was sometimes even systematically removed before performing diagnosis-related analyses (e.g., (35)).  
777 The strong relationship between hypoxia and gene expression in human post-mortem samples was  
778 hypothesized to be partially mediated by neuronal necrosis (81) and lactic acidosis (79). However, the  
779 magnitude of the effect of hypoxia on gene expression was still puzzling, especially when compared to  
780 the much more moderate effects of post-mortem interval, even when the intervals ranged from 8-40+ hrs.  
781 Our current analysis provides an explanation for this discrepancy, since it is clear from our results that the  
782 brains of our subjects are *actively compensating* for a hypoxic environment prior to death by altering the  
783 balance or overall transcriptional activity of support cells and neurons. The differential effects of hypoxia  
784 on neurons and glial cells have been studied since the 1960's (82), but to our knowledge this is the first  
785 time that anyone has related the large effects of hypoxia in post-mortem transcriptomic data to a  
786 corresponding upregulation in the transcriptional activity of vascular cell types (46).

787         This connection is important for understanding why results associating gene expression and  
788 psychiatric illness in human post-mortem tissue sometimes do not replicate. If a study contains mostly  
789 tissue from individuals who experienced greater hypoxia before death (e.g., hospital care with artificial  
790 respiration or drug overdose followed by coma), then the evaluation of the effect of neuropsychiatric  
791 illness is likely to inadvertently focus on differential expression in support cell types (astrocytes,  
792 endothelial cells), whereas a study that mostly contains tissue from individuals who died a fast death (e.g.,

## Running Head: PREDICTING CELL TYPE BALANCE

793 car accident or myocardial infarction) will emphasize the effects of neuropsychiatric illness in neurons.  
794 That said, although both indicators of perimortem hypoxia (agonal factor and acidosis (pH)) showed  
795 similar strong relationships with cell type balance, we do recommend some caution when interpreting the  
796 relationship between pH and cell type in tissue from subjects with psychiatric disorders, as pH can  
797 indicate other biological changes besides hypoxia. For example, there are small consistent decreases in  
798 pH associated with Bipolar Disorder even in live subjects (83–85) and metabolic changes associated with  
799 pH are theorized to play an important role in Schizophrenia (80). Therefore, some of the relationship  
800 between pH and cell type balance may be driven by a third variable (psychiatric illness or psychiatric  
801 treatment). It is also possible that a change in the cell content of brain tissue could cause a change in pH  
802 (86).

803 We found that including cell type indices as co-variates while running differential expression  
804 analyses helped improve our ability to detect previously-documented relationships between psychiatric  
805 illness and gene expression in datasets that were particularly affected by variability in cell type balance.  
806 This improvement was not seen in datasets that were less affected by variability in cell type balance,  
807 despite improvements in model fit and a lack of strong multicollinearity between diagnosis and the cell  
808 type indices. This finding was initially surprising to us, but upon further consideration makes sense, as  
809 the cell type indices are multi-parameter gene expression variables. Therefore, there is increased risk of  
810 overfitting when modeling the data for any particular gene. We conclude that the addition of cell type  
811 covariates to differential expression models is only recommended when there is a particularly large  
812 amount of variability in the dataset associated with cell type balance, or when there is strong reason to  
813 believe that technical variation associated with cell type (such as dissection) may be highly confounding  
814 in the result. We strongly recommend that model selection while conducting differential expression  
815 analyses should be considered carefully, and evaluated not only in terms of fit parameters but also validity  
816 and interpretability.

817 Regarding the importance of model selection for interpretability, it is worth noting that an  
818 important difference between our final analysis methods and those used by some previous researchers

## Running Head: PREDICTING CELL TYPE BALANCE

819 (*e.g.*, 10–12) was the lack of cell type interaction terms included in our models (*e.g.*, Diagnosis\*Astrocyte  
820 Index). Theoretically, the addition of cell type interaction terms should allow the researcher to statistically  
821 interrogate cell-type differentiated diagnosis effects because samples that contain more of a particular cell  
822 type should exhibit more of that cell type’s respective diagnosis effect. Versions of this form of analysis  
823 have been successful in other investigations (*e.g.*, (11,12,87)) but we were not able to validate the method  
824 using our database of previously-documented relationships with diagnosis in prefrontal cell types (**Figure**  
825 **7**) and a variety of model specifications (*e.g.*, **Suppl. Figure 26**). Upon consideration, we realized that  
826 these negative results were difficult to interpret because significant diagnosis\*cell type interactions should  
827 only become evident if the effect of diagnosis in a particular cell type is different from what is occurring  
828 in all cell types on average. For genes with expression that is reasonably specific to a particular cell type  
829 (*e.g.*, GAD1, PVALB), the overall average diagnosis effect may already largely reflect the effect within  
830 that cell type and the respective interaction term will not be significantly different, even though the  
831 disease effect is clearly tracking the balance of that cell population. In the end, we decided that the  
832 addition of interaction terms to our models was not demonstrably worth the associated decrease in overall  
833 model fit and statistical power.

834 Finally, our work drives home the fact that any comprehensive theory of psychiatric illness needs  
835 to account for the dichotomy between the health of individual cells and that of their ecosystem. We found  
836 that the functional changes accompanying psychiatric illness in the cortex occurred both at the level of  
837 cell population shifts (decreased astrocytic presence and red blood cell count) and at the level of intrinsic  
838 gene regulation not explained by population shifts. A similar conclusion regarding the importance of cell  
839 type balance in association with psychiatric illness was recently drawn by our collaborators (*e.g.*,(88))  
840 using a similar technique to analyze RNA-Seq data from the anterior cingulate cortex. In the future, we  
841 plan to use our technique to re-analyze many of the other large microarray datasets existing within the  
842 Pritzker Neuropsychiatric Consortium with the hope of gaining better insight into psychiatric disease  
843 effects. This application of our technique seems particularly important in light of recent evidence linking  
844 disrupted neuroimmunity (89) and neuroglia (*e.g.*, (49,58,90)) to psychiatric illness, as well as growing



845 evidence that growth factors with cell type specific effects play an important role in depressive illness and  
846 emotional regulation (for a review see (23,91)).

847 In conclusion, we have found this method to be a valuable addition to traditional functional  
848 ontology tools as a manner of improving the interpretation of transcriptomic results. The capability to  
849 unravel alterations of cell type composition from modulation of cell state, even just probabilistically, is  
850 inherently useful for understanding the higher-level function of the brain as emergent properties of brain  
851 activity, such as emotion, cognition, memory, and addiction, usually involve ensembles of many cells.  
852 Facilitating the interpretation of gene activity data in macro-dissected tissue in light of both processes  
853 provides new opportunities to integrate results with findings from other approaches, such as  
854 electrophysiology analysis of brain circuits, brain imaging, optogenetic manipulations, and naturally  
855 occurring variation in response to injury and brain diseases.

856 For the benefit of other researchers, we have made our database of brain cell type specific genes  
857 (<https://sites.google.com/a/umich.edu/megan-hastings-hagenauer/home/cell-type-analysis>) and R code for  
858 conducting cell type analyses publicly available in the form of a downloadable R package  
859 (<https://github.com/hagenaue/BrainInABlender>) and we are happy to assist researchers in their usage for  
860 pursuing better insight into psychiatric illness and neurological disease.

861

## 862 **5. Acknowledgements**

863 We thank all the members of the Pritzker Consortium (especially the University of California, Irvine  
864 Brain Bank staff), Drs. Adriana Medina and David Krolewski for brain dissections and methodological  
865 input, and Dr. Simon Evans, Sharon Burke and Mary Hoverstein for their involvement in the initial  
866 mRNA extraction and microarrays. Grace Hsienyuan Chang, Jennifer Fitzpatrick, LeAnn Fitzpatrick, Jim  
867 Stewart, Tom Dixon, Doug Smith, Andy Lin, and Manhong Dai were invaluable for maintaining our  
868 databases of clinical information and biological specimens. We would also like to thank Drs. Elyse  
869 Aurbach, Katherine Prater, Kathryn Hilde, Fan Meng, Lilah Toker, and Mark Reimers for advice and



870 feedback regarding the methodology or manuscript. We would also like to thank our undergraduate  
871 research assistants Isabelle Birt, Alek Pankonin, and Daniela Romero Vargas for their help compiling the  
872 Allen Brain Atlas data, annotating and uploading code, creating the BrainInABlender R package, and  
873 editorial assistance. Finally, we would like to thank our reviewers, whose insightful feedback helped  
874 inspire several particularly useful analyses, leading us to a stronger set of conclusions.

875

## 876 6. References

- 877 1. Arion D, Corradi JP, Tang S, Datta D, Boothe F, He A, et al. Distinctive transcriptome  
878 alterations of prefrontal pyramidal neurons in schizophrenia and schizoaffective  
879 disorder. *Mol Psychiatry*. 2015 Nov;20(11):1397–405.
- 880 2. Darmanis S, Sloan SA, Zhang Y, Enge M, Caneda C, Shuer LM, et al. A survey of human  
881 brain transcriptome diversity at the single cell level. *Proc Natl Acad Sci U S A*. 2015 Jun  
882 9;112(23):7285–90.
- 883 3. Lake BB, Ai R, Kaeser GE, Salathia NS, Yung YC, Liu R, et al. Neuronal subtypes and  
884 diversity revealed by single-nucleus RNA sequencing of the human brain. *Science*.  
885 2016 Jun 24;352(6293):1586–90.
- 886 4. Choi KH, Elashoff M, Higgs BW, Song J, Kim S, Sabunciyar S, et al. Putative psychosis  
887 genes in the prefrontal cortex: combined analysis of gene expression microarrays.  
888 *BMC Psychiatry*. 2008;8:87.
- 889 5. Evans SJ, Choudary PV, Neal CR, Li JZ, Vawter MP, Tomita H, et al. Dysregulation of the  
890 fibroblast growth factor system in major depression. *Proc Natl Acad Sci U S A*. 2004  
891 Oct 26;101(43):15506–11.
- 892 6. Abbas AR, Wolslegel K, Seshasayee D, Modrusan Z, Clark HF. Deconvolution of blood  
893 microarray data identifies cellular activation patterns in systemic lupus  
894 erythematosus. *PloS One*. 2009;4(7):e6098.
- 895 7. Chikina M, Zaslavsky E, Sealton SC. CellCODE: a robust latent variable approach to  
896 differential expression analysis for heterogeneous cell populations. *Bioinforma Oxf*  
897 *Engl*. 2015 May 15;31(10):1584–91.
- 898 8. Gaujoux R, Seoighe C. CellMix: a comprehensive toolbox for gene expression  
899 deconvolution. *Bioinforma Oxf Engl*. 2013 Sep 1;29(17):2211–2.
- 900 9. Shen-Orr SS, Gaujoux R. Computational deconvolution: extracting cell type-specific  
901 information from heterogeneous samples. *Curr Opin Immunol*. 2013 Oct;25(5):571–8.

- 902 10. Capurro A, Bodea L-G, Schaefer P, Luthi-Carter R, Perreau VM. Computational  
903 deconvolution of genome wide expression data from Parkinson's and Huntington's  
904 disease brain tissues using population-specific expression analysis. *Front Neurosci.*  
905 2014;8:441.
- 906 11. Kuhn A, Kumar A, Beilina A, Dillman A, Cookson MR, Singleton AB. Cell population-  
907 specific expression analysis of human cerebellum. *BMC Genomics.* 2012;13:610.
- 908 12. Kuhn A, Thu D, Waldvogel HJ, Faull RLM, Luthi-Carter R. Population-specific  
909 expression analysis (PSEA) reveals molecular changes in diseased brain. *Nat Methods.*  
910 2011 Nov;8(11):945–7.
- 911 13. Cahoy JD, Emery B, Kaushal A, Foo LC, Zamanian JL, Christopherson KS, et al. A  
912 transcriptome database for astrocytes, neurons, and oligodendrocytes: a new resource  
913 for understanding brain development and function. *J Neurosci Off J Soc Neurosci.* 2008  
914 Jan 2;28(1):264–78.
- 915 14. Daneman R, Zhou L, Agalliu D, Cahoy JD, Kaushal A, Barres BA. The mouse blood-brain  
916 barrier transcriptome: a new resource for understanding the development and  
917 function of brain endothelial cells. *PLoS One.* 2010;5(10):e13741.
- 918 15. Doyle JP, Dougherty JD, Heiman M, Schmidt EF, Stevens TR, Ma G, et al. Application of a  
919 translational profiling approach for the comparative analysis of CNS cell types. *Cell.*  
920 2008 Nov 14;135(4):749–62.
- 921 16. Sugino K, Hempel CM, Miller MN, Hattox AM, Shapiro P, Wu C, et al. Molecular  
922 taxonomy of major neuronal classes in the adult mouse forebrain. *Nat Neurosci.* 2006  
923 Jan;9(1):99–107.
- 924 17. Zeisel A, Muñoz-Manchado AB, Codeluppi S, Lönnerberg P, La Manno G, Juréus A, et al.  
925 Brain structure. Cell types in the mouse cortex and hippocampus revealed by single-  
926 cell RNA-seq. *Science.* 2015 Mar 6;347(6226):1138–42.
- 927 18. Zhang Y, Chen K, Sloan SA, Bennett ML, Scholze AR, O'Keeffe S, et al. An RNA-  
928 sequencing transcriptome and splicing database of glia, neurons, and vascular cells of  
929 the cerebral cortex. *J Neurosci Off J Soc Neurosci.* 2014 Sep 3;34(36):11929–47.
- 930 19. Lewis DA, Sweet RA. Schizophrenia from a neural circuitry perspective: advancing  
931 toward rational pharmacological therapies. *J Clin Invest.* 2009 Apr;119(4):706–16.
- 932 20. Lynch JC. The Cerebral Cortex. In: *Fundamental Neuroscience.* 2nd ed. Philadelphia:  
933 Churchill Livingstone; 2002. p. 505–20.
- 934 21. Hutchins DE, Naftel JP, Ard MD. The cell biology of neurons and glia. In: *Fundamental*  
935 *Neuroscience.* 2nd ed. Philadelphia: Churchill Livingstone; 2002. p. 15–36.

- 936 22. Bergers G, Song S. The role of pericytes in blood-vessel formation and maintenance.  
937 Neuro-Oncol. 2005 Oct;7(4):452–64.
- 938 23. Duman RS, Monteggia LM. A neurotrophic model for stress-related mood disorders.  
939 Biol Psychiatry. 2006 Jun 15;59(12):1116–27.
- 940 24. Doss JF, Corcoran DL, Jima DD, Telen MJ, Dave SS, Chi J-T. A comprehensive joint  
941 analysis of the long and short RNA transcriptomes of human erythrocytes. BMC  
942 Genomics. 2015;16(1):952.
- 943 25. Hawrylycz MJ, Lein ES, Guillozet-Bongaarts AL, Shen EH, Ng L, Miller JA, et al. An  
944 anatomically comprehensive atlas of the adult human brain transcriptome. Nature.  
945 2012 Sep 20;489(7416):391–9.
- 946 26. Allen Brain Atlas. Technical White Paper: Case qualification and donor profiles, v.7  
947 [Internet]. 2013. Available from: [help.brain-map.org](http://help.brain-map.org)
- 948 27. Allen Brain Atlas. Technical White Paper: Microarray Survey, v.7 [Internet]. 2013.  
949 Available from: [help.brain-map.org](http://help.brain-map.org)
- 950 28. Allen Brain Atlas. Technical White Paper: Microarray Data Normalization, v.1  
951 [Internet]. 2013. Available from: [help.brain-map.org](http://help.brain-map.org)
- 952 29. Carpenter MB. Core Text of Neuroanatomy. 4th ed. Baltimore, MD: Williams & Wilkins;  
953 1991.
- 954 30. Amaral DG, Scharfman HE, Lavenex P. The dentate gyrus: fundamental  
955 neuroanatomical organization (dentate gyrus for dummies). Prog Brain Res.  
956 2007;163:3–22.
- 957 31. Sun N, Cassell MD. Intrinsic GABAergic neurons in the rat central extended amygdala. J  
958 Comp Neurol. 1993 Apr 15;330(3):381–404.
- 959 32. Li JZ, Vawter MP, Walsh DM, Tomita H, Evans SJ, Choudary PV, et al. Systematic  
960 changes in gene expression in postmortem human brains associated with tissue pH  
961 and terminal medical conditions. Hum Mol Genet. 2004 Mar 15;13(6):609–16.
- 962 33. Tomita H, Vawter MP, Walsh DM, Evans SJ, Choudary PV, Li J, et al. Effect of agonal and  
963 postmortem factors on gene expression profile: quality control in microarray analyses  
964 of postmortem human brain. Biol Psychiatry. 2004 Feb 15;55(4):346–52.
- 965 34. Irizarry RA, Hobbs B, Collin F, Beazer-Barclay YD, Antonellis KJ, Scherf U, et al.  
966 Exploration, normalization, and summaries of high density oligonucleotide array  
967 probe level data. Biostat Oxf Engl. 2003 Apr;4(2):249–64.

Running Head: PREDICTING CELL TYPE BALANCE

- 968 35. Li JZ, Bunney BG, Meng F, Hagenauer MH, Walsh DM, Vawter MP, et al. Circadian  
969 patterns of gene expression in the human brain and disruption in major depressive  
970 disorder. *Proc Natl Acad Sci U S A*. 2013 Jun 11;110(24):9950–5.
- 971 36. Lanz TA, Joshi JJ, Reinhart V, Johnson K, Grantham LE, Volfson D. STEP levels are  
972 unchanged in pre-frontal cortex and associative striatum in post-mortem human brain  
973 samples from subjects with schizophrenia, bipolar disorder and major depressive  
974 disorder. *PloS One*. 2015;10(3):e0121744.
- 975 37. Barnes MR, Huxley-Jones J, Maycox PR, Lennon M, Thornber A, Kelly F, et al.  
976 Transcription and pathway analysis of the superior temporal cortex and anterior  
977 prefrontal cortex in schizophrenia. *J Neurosci Res*. 2011 Aug;89(8):1218–27.
- 978 38. Narayan S, Tang B, Head SR, Gilmartin TJ, Sutcliffe JG, Dean B, et al. Molecular profiles  
979 of schizophrenia in the CNS at different stages of illness. *Brain Res*. 2008 Nov  
980 6;1239:235–48.
- 981 39. Fasold M, Binder H. AffyRNADegradation: control and correction of RNA quality effects  
982 in GeneChip expression data. *Bioinformatics*. 2013 Jan;29(1):129–31.
- 983 40. Fromer M, Roussos P, Sieberts SK, Johnson JS, Kavanagh DH, Perumal TM, et al. Gene  
984 expression elucidates functional impact of polygenic risk for schizophrenia. *Nat*  
985 *Neurosci*. 2016 Nov;19(11):1442–53.
- 986 41. Kim D, Langmead B, Salzberg SL. HISAT: a fast spliced aligner with low memory  
987 requirements. *Nat Methods*. 2015 Apr;12(4):357–60.
- 988 42. Law CW, Chen Y, Shi W, Smyth GK. voom: Precision weights unlock linear model  
989 analysis tools for RNA-seq read counts. *Genome Biol*. 2014 Feb 3;15(2):R29.
- 990 43. Wilkerson MD, Hayes DN. ConsensusClusterPlus: a class discovery tool with  
991 confidence assessments and item tracking. *Bioinforma Oxf Engl*. 2010 Jun  
992 15;26(12):1572–3.
- 993 44. Viechtbauer W. Conducting Meta-Analyses in R with The metafor Package. *J Stat Softw*.  
994 2010 Aug 1;36.
- 995 45. Pollard KS, Dudoit S, Laan MJ van der. Multiple Testing Procedures: the multtest  
996 Package and Applications to Genomics. In: *Bioinformatics and Computational Biology*  
997 *Solutions Using R and Bioconductor* [Internet]. Springer, New York, NY; 2005 [cited  
998 2017 Oct 13]. p. 249–71. (Statistics for Biology and Health). Available from:  
999 [https://link.springer.com/chapter/10.1007/0-387-29362-0\\_15](https://link.springer.com/chapter/10.1007/0-387-29362-0_15)
- 1000 46. Li L, Welser JV, Dore-Duffy P, del Zoppo GJ, Lamanna JC, Milner R. In the hypoxic  
1001 central nervous system, endothelial cell proliferation is followed by astrocyte  
1002 activation, proliferation, and increased expression of the alpha 6 beta 4 integrin and  
1003 dystroglycan. *Glia*. 2010 Aug;58(10):1157–67.

Running Head: PREDICTING CELL TYPE BALANCE

- 1004 47. Banasiak KJ, Haddad GG. Hypoxia-induced apoptosis: effect of hypoxic severity and  
1005 role of p53 in neuronal cell death. *Brain Res.* 1998 Jun 29;797(2):295–304.
- 1006 48. Sowell ER, Peterson BS, Thompson PM, Welcome SE, Henkenius AL, Toga AW.  
1007 Mapping cortical change across the human life span. *Nat Neurosci.* 2003  
1008 Mar;6(3):309–15.
- 1009 49. Rajkowska G, Miguel-Hidalgo JJ, Wei J, Dille G, Pittman SD, Meltzer HY, et al.  
1010 Morphometric evidence for neuronal and glial prefrontal cell pathology in major  
1011 depression. *Biol Psychiatry.* 1999 May 1;45(9):1085–98.
- 1012 50. Smith DE, Rapp PR, McKay HM, Roberts JA, Tuszynski MH. Memory impairment in  
1013 aged primates is associated with focal death of cortical neurons and atrophy of  
1014 subcortical neurons. *J Neurosci Off J Soc Neurosci.* 2004 May 5;24(18):4373–81.
- 1015 51. Stranahan AM, Jiam NT, Spiegel AM, Gallagher M. Aging reduces total neuron number  
1016 in the dorsal component of the rodent prefrontal cortex. *J Comp Neurol.* 2012 Apr  
1017 15;520(6):1318–26.
- 1018 52. Peters A, Sethares C. Oligodendrocytes, their progenitors and other neuroglial cells in  
1019 the aging primate cerebral cortex. *Cereb Cortex N Y N 1991.* 2004 Sep;14(9):995–  
1020 1007.
- 1021 53. Resnick SM, Pham DL, Kraut MA, Zonderman AB, Davatzikos C. Longitudinal magnetic  
1022 resonance imaging studies of older adults: a shrinking brain. *J Neurosci Off J Soc  
1023 Neurosci.* 2003 Apr 15;23(8):3295–301.
- 1024 54. Salat DH, Buckner RL, Snyder AZ, Greve DN, Desikan RSR, Busa E, et al. Thinning of the  
1025 cerebral cortex in aging. *Cereb Cortex N Y N 1991.* 2004 Jul;14(7):721–30.
- 1026 55. Peters A, Sethares C, Moss MB. HOW THE PRIMATE FORNIX IS AFFECTED BY AGE. *J  
1027 Comp Neurol.* 2010 Oct 1;518(19):3962–80.
- 1028 56. Shepherd TM, Flint JJ, Thelwall PE, Stanisz GJ, Mareci TH, Yachnis AT, et al.  
1029 Postmortem interval alters the water relaxation and diffusion properties of rat  
1030 nervous tissue--implications for MRI studies of human autopsy samples. *NeuroImage.*  
1031 2009 Feb 1;44(3):820–6.
- 1032 57. Cotter DR, Pariante CM, Everall IP. Glial cell abnormalities in major psychiatric  
1033 disorders: The evidence and implications. *Brain Res Bull.* 2001 Jul 15;55(5):585–95.
- 1034 58. Banasr M, Duman RS. Glial loss in the prefrontal cortex is sufficient to induce  
1035 depressive-like behaviors. *Biol Psychiatry.* 2008 Nov 15;64(10):863–70.
- 1036 59. RAGLAND JD, YOON J, MINZENBERG MJ, CARTER CS. Neuroimaging of cognitive  
1037 disability in schizophrenia: Search for a pathophysiological mechanism. *Int Rev  
1038 Psychiatry Abingdon Engl.* 2007 Aug;19(4):417–27.

- 1039 60. Peters A, Sethares C, Luebke JI. Synapses are lost during aging in the primate  
1040 prefrontal cortex. *Neuroscience*. 2008 Apr 9;152(4):970–81.
- 1041 61. Huang DW, Sherman BT, Zheng X, Yang J, Imamichi T, Stephens R, et al. Extracting  
1042 biological meaning from large gene lists with DAVID. *Curr Protoc Bioinforma Ed Board*  
1043 *Andreas Baxevanis Al*. 2009 Sep;Chapter 13:Unit 13.11.
- 1044 62. Huang DW, Sherman BT, Lempicki RA. Systematic and integrative analysis of large  
1045 gene lists using DAVID bioinformatics resources. *Nat Protoc*. 2009;4(1):44–57.
- 1046 63. Subramanian A, Tamayo P, Mootha VK, Mukherjee S, Ebert BL, Gillette MA, et al. Gene  
1047 set enrichment analysis: a knowledge-based approach for interpreting genome-wide  
1048 expression profiles. *Proc Natl Acad Sci U S A*. 2005 Oct 25;102(43):15545–50.
- 1049 64. Mootha VK, Lindgren CM, Eriksson K-F, Subramanian A, Sihag S, Lehar J, et al. PGC-  
1050 1alpha-responsive genes involved in oxidative phosphorylation are coordinately  
1051 downregulated in human diabetes. *Nat Genet*. 2003 Jul;34(3):267–73.
- 1052 65. Sergushichev A. An algorithm for fast preranked gene set enrichment analysis using  
1053 cumulative statistic calculation. *bioRxiv [Internet]*. 2016 Jun 20; Available from:  
1054 <http://biorxiv.org/content/early/2016/06/20/060012.abstract>
- 1055 66. Guidotti A, Auta J, Davis JM, Di-Giorgi-Gerevini V, Dwivedi Y, Grayson DR, et al.  
1056 Decrease in reelin and glutamic acid decarboxylase67 (GAD67) expression in  
1057 schizophrenia and bipolar disorder: a postmortem brain study. *Arch Gen Psychiatry*.  
1058 2000 Nov;57(11):1061–9.
- 1059 67. Hashimoto T, Volk DW, Eggan SM, Mirnics K, Pierri JN, Sun Z, et al. Gene expression  
1060 deficits in a subclass of GABA neurons in the prefrontal cortex of subjects with  
1061 schizophrenia. *J Neurosci Off J Soc Neurosci*. 2003 Jul 16;23(15):6315–26.
- 1062 68. Volk DW, Austin MC, Pierri JN, Sampson AR, Lewis DA. Decreased glutamic acid  
1063 decarboxylase67 messenger RNA expression in a subset of prefrontal cortical gamma-  
1064 aminobutyric acid neurons in subjects with schizophrenia. *Arch Gen Psychiatry*. 2000  
1065 Mar;57(3):237–45.
- 1066 69. Morris HM, Hashimoto T, Lewis DA. Alterations in somatostatin mRNA expression in  
1067 the dorsolateral prefrontal cortex of subjects with schizophrenia or schizoaffective  
1068 disorder. *Cereb Cortex N Y N 1991*. 2008 Jul;18(7):1575–87.
- 1069 70. Volk D, Austin M, Pierri J, Sampson A, Lewis D. GABA transporter-1 mRNA in the  
1070 prefrontal cortex in schizophrenia: decreased expression in a subset of neurons. *Am J*  
1071 *Psychiatry*. 2001 Feb;158(2):256–65.
- 1072 71. Pandey GN, Dwivedi Y, Rizavi HS, Ren X, Pandey SC, Pesold C, et al. Higher expression  
1073 of serotonin 5-HT(2A) receptors in the postmortem brains of teenage suicide victims.  
1074 *Am J Psychiatry*. 2002 Mar;159(3):419–29.



- 1075 72. Pietersen CY, Mauney SA, Kim SS, Passeri E, Lim MP, Rooney RJ, et al. Molecular  
1076 profiles of parvalbumin-immunoreactive neurons in the superior temporal cortex in  
1077 schizophrenia. *J Neurogenet.* 2014 Jun;28(1-2):70-85.
- 1078 73. Mauney SA, Pietersen CY, Sonntag K-C, Woo T-UW. Differentiation of oligodendrocyte  
1079 precursors is impaired in the prefrontal cortex in schizophrenia. *Schizophr Res.* 2015  
1080 Dec;169(1-3):374-80.
- 1081 74. Mistry M, Gillis J, Pavlidis P. Genome-wide expression profiling of schizophrenia using  
1082 a large combined cohort. *Mol Psychiatry.* 2013 Feb;18(2):215-25.
- 1083 75. Choi KH, Higgs BW, Wendland JR, Song J, McMahon FJ, Webster MJ. Gene expression  
1084 and genetic variation data implicate PCLO in bipolar disorder. *Biol Psychiatry.* 2011  
1085 Feb 15;69(4):353-9.
- 1086 76. Tasic B, Menon V, Nguyen TN, Kim TK, Jarsky T, Yao Z, et al. Adult mouse cortical cell  
1087 taxonomy revealed by single cell transcriptomics. *Nat Neurosci.* 2016 Feb;19(2):335-  
1088 46.
- 1089 77. Mancarci O, Toker L, Tripathy S, Li B, Rocco B, Sibille E, et al. NeuroExpresso: A cross-  
1090 laboratory database of brain cell-type expression profiles with applications to marker  
1091 gene identification and bulk brain tissue transcriptome interpretation. *bioRxiv*  
1092 [Internet]. 2016 Nov 22; Available from:  
1093 <http://biorxiv.org/content/biorxiv/early/2016/11/22/089219.full.pdf>
- 1094 78. Atz M, Walsh D, Cartagena P, Li J, Evans S, Choudary P, et al. Methodological  
1095 considerations for gene expression profiling of human brain. *J Neurosci Methods.*  
1096 2007 Jul 30;163(2):295-309.
- 1097 79. Vawter MP, Tomita H, Meng F, Bolstad B, Li J, Evans S, et al. Mitochondrial-related gene  
1098 expression changes are sensitive to agonal-pH state: implications for brain disorders.  
1099 *Mol Psychiatry.* 2006 Jul;11(7):615, 663-79.
- 1100 80. Sequeira PA, Martin MV, Vawter MP. The first decade and beyond of transcriptional  
1101 profiling in schizophrenia. *Neurobiol Dis.* 2012 Jan 1;45(1):23-36.
- 1102 81. Weis S, Llenos IC, Dulay JR, Elashoff M, Martínez-Murillo F, Miller CL. Quality control  
1103 for microarray analysis of human brain samples: The impact of postmortem factors,  
1104 RNA characteristics, and histopathology. *J Neurosci Methods.* 2007 Sep  
1105 30;165(2):198-209.
- 1106 82. Hamberger A, Hyden H. Inverse enzymatic changes in neurons and glia during  
1107 increased function and hypoxia. *J Cell Biol.* 1963 Mar;16:521-5.
- 1108 83. Kato T, Murashita J, Kamiya A, Shioiri T, Kato N, Inubushi T. Decreased brain  
1109 intracellular pH measured by P-31-MRS in bipolar disorder: a confirmation in drug-

- 1110 free patients and correlation with white matter hyperintensity. *Eur Arch Psychiatry*  
1111 *Clin Neurosci.* 1998 Dec;248(6):301–6.
- 1112 84. Hamakawa H, Murashita J, Yamada N, Inubushi T, Kato N, Kato T. Reduced  
1113 intracellular pH in the basal ganglia and whole brain measured by P-31-MRS in bipolar  
1114 disorder. *Psychiatry Clin Neurosci.* 2004 Feb;58(1):82–8.
- 1115 85. Johnson CP, Follmer RL, Oguz I, Warren LA, Christensen GE, Fiedorowicz JG, et al.  
1116 Brain abnormalities in bipolar disorder detected by quantitative T1 rho mapping. *Mol*  
1117 *Psychiatry.* 2015 Feb;20(2):201–6.
- 1118 86. Chesler M, Kraig R. Intracellular Ph of Astrocytes Increases Rapidly with Cortical  
1119 Stimulation. *Am J Physiol.* 1987 Oct;253(4):R666–70.
- 1120 87. Montaña CM, Irizarry RA, Kaufmann WE, Talbot K, Gur RE, Feinberg AP, et al.  
1121 Measuring cell-type specific differential methylation in human brain tissue. *Genome*  
1122 *Biol.* 2013;14(8):R94.
- 1123 88. Bowling K, Ramaker RC, Lasseigne BN, Hagenauer M, Hardigan A, Davis N, et al. Post-  
1124 mortem molecular profiling of three psychiatric disorders reveals widespread  
1125 dysregulation of cell-type associated transcripts and refined disease-related  
1126 transcription changes. *bioRxiv.* 2016 Jun 29;061416.
- 1127 89. Chase KA, Rosen C, Gin H, Bjorkquist O, Feiner B, Marvin R, et al. Metabolic and  
1128 inflammatory genes in schizophrenia. *Psychiatry Res.* 2015 Jan 30;225(1–2):208–11.
- 1129 90. Medina A, Watson SJ, Bunney W, Myers RM, Schatzberg A, Barchas J, et al. Evidence for  
1130 alterations of the glial syncytial function in major depressive disorder. *J Psychiatr Res.*  
1131 2016 Jan;72:15–21.
- 1132 91. Turner CA, Watson SJ, Akil H. The fibroblast growth factor family: neuromodulation of  
1133 affective behavior. *Neuron.* 2012 Oct 4;76(1):160–74.
- 1134 92. Oldham MC, Konopka G, Iwamoto K, Langfelder P, Kato T, Horvath S, et al. Functional  
1135 organization of the transcriptome in human brain. *Nat Neurosci.* 2008  
1136 Nov;11(11):1271–82.
- 1137 93. American Psychiatric Association. *Diagnostic and Statistical Manual of Mental*  
1138 *Disorders (DSM-IV-TR).* 4th ed. Washington, D.C.: American Psychiatric Association;  
1139 2000.
- 1140 94. Dai M, Wang P, Boyd AD, Kostov G, Athey B, Jones EG, et al. Evolving gene/transcript  
1141 definitions significantly alter the interpretation of GeneChip data. *Nucleic Acids Res.*  
1142 2005;33(20):e175.



- 1143 95. Coupel S, Moreau A, Hamidou M, Horejsi V, Soullillou J-P, Charreau B. Expression and  
1144 release of soluble HLA-E is an immunoregulatory feature of endothelial cell activation.  
1145 Blood. 2007 Apr 1;109(7):2806–14.
- 1146 96. Tian H, McKnight SL, Russell DW. Endothelial PAS domain protein 1 (EPAS1), a  
1147 transcription factor selectively expressed in endothelial cells. Genes Dev. 1997 Jan  
1148 1;11(1):72–82.
- 1149 97. Tchorz JS, Tome M, Cloëtta D, Sivasankaran B, Grzmil M, Huber RM, et al. Constitutive  
1150 Notch2 signaling in neural stem cells promotes tumorigenic features and astroglial  
1151 lineage entry. Cell Death Dis. 2012;3:e325.
- 1152 98. Boyles JK, Pitas RE, Wilson E, Mahley RW, Taylor JM. Apolipoprotein E associated with  
1153 astrocytic glia of the central nervous system and with nonmyelinating glia of the  
1154 peripheral nervous system. J Clin Invest. 1985 Oct;76(4):1501–13.
- 1155 99. Fazzari P, Paternain AV, Valiente M, Pla R, Luján R, Lloyd K, et al. Control of cortical  
1156 GABA circuitry development by Nrg1 and ErbB4 signalling. Nature. 2010 Apr  
1157 29;464(7293):1376–80.
- 1158 100. Stephenson DT, Coskran TM, Kelly MP, Kleiman RJ, Morton D, O’Neill SM, et al. The  
1159 distribution of phosphodiesterase 2A in the rat brain. Neuroscience. 2012 Dec  
1160 13;226:145–55.
- 1161 101. Marszalek JR, Weiner JA, Farlow SJ, Chun J, Goldstein LS. Novel dendritic kinesin  
1162 sorting identified by different process targeting of two related kinesins: KIF21A and  
1163 KIF21B. J Cell Biol. 1999 May 3;145(3):469–79.
- 1164 102. Rao JS, Harry GJ, Rapoport SI, Kim HW. Increased excitotoxicity and  
1165 neuroinflammatory markers in postmortem frontal cortex from bipolar disorder  
1166 patients. Mol Psychiatry. 2010 Apr;15(4):384–92.
- 1167 103. Spiliotaki M, Salpeas V, Malitas P, Alevizos V, Moutsatsou P. Altered glucocorticoid  
1168 receptor signaling cascade in lymphocytes of bipolar disorder patients.  
1169 Psychoneuroendocrinology. 2006 Jul;31(6):748–60.
- 1170 104. Le-Niculescu H, Patel SD, Bhat M, Kuczenski R, Faraone SV, Tsuang MT, et al.  
1171 Convergent functional genomics of genome-wide association data for bipolar disorder:  
1172 comprehensive identification of candidate genes, pathways and mechanisms. Am J  
1173 Med Genet Part B Neuropsychiatr Genet Off Publ Int Soc Psychiatr Genet. 2009 Mar  
1174 5;150B(2):155–81.
- 1175 105. Konopaske GT, Subburaju S, Coyle JT, Benes FM. Altered prefrontal cortical MARCKS  
1176 and PPP1R9A mRNA expression in schizophrenia and bipolar disorder. Schizophr Res.  
1177 2015 May;164(1–3):100–8.

Running Head: PREDICTING CELL TYPE BALANCE

- 1178 106. Glessner JT, Reilly MP, Kim CE, Takahashi N, Albano A, Hou C, et al. Strong synaptic  
1179 transmission impact by copy number variations in schizophrenia. *Proc Natl Acad Sci U*  
1180 *S A*. 2010 Jun 8;107(23):10584–9.
- 1181 107. Ayoub MA, Angelicheva D, Vile D, Chandler D, Morar B, Cavanaugh JA, et al. Deleterious  
1182 GRM1 mutations in schizophrenia. *PloS One*. 2012;7(3):e32849.
- 1183 108. Frank RAW, McRae AF, Pocklington AJ, van de Lagemaat LN, Navarro P, Croning MDR,  
1184 et al. Clustered coding variants in the glutamate receptor complexes of individuals  
1185 with schizophrenia and bipolar disorder. *PloS One*. 2011;6(4):e19011.
- 1186 109. Etain B, Dumaine A, Mathieu F, Chevalier F, Henry C, Kahn J-P, et al. A SNAP25  
1187 promoter variant is associated with early-onset bipolar disorder and a high  
1188 expression level in brain. *Mol Psychiatry*. 2010 Jul;15(7):748–55.
- 1189 110. Fatjó-Vilas M, Prats C, Pomarol-Clotet E, Lázaro L, Moreno C, González-Ortega I, et al.  
1190 Involvement of NRN1 gene in schizophrenia-spectrum and bipolar disorders and its  
1191 impact on age at onset and cognitive functioning. *World J Biol Psychiatry Off J World*  
1192 *Fed Soc Biol Psychiatry*. 2016;17(2):129–39.
- 1193 111. Volk DW, Chitrapu A, Edelson JR, Roman KM, Moroco AE, Lewis DA. Molecular  
1194 mechanisms and timing of cortical immune activation in schizophrenia. *Am J*  
1195 *Psychiatry*. 2015 Nov 1;172(11):1112–21.
- 1196 112. Girgenti MJ, LoTurco JJ, Maher BJ. ZNF804a regulates expression of the schizophrenia-  
1197 associated genes PRSS16, COMT, PDE4B, and DRD2. *PloS One*. 2012;7(2):e32404.
- 1198

1199 **7. Supporting Information**

1200

1201

1202 **Supplementary Material for:**

1203

1204 **INFERENCE OF CELL TYPE COMPOSITION FROM HUMAN BRAIN TRANSCRIPTOMIC**

1205 **DATASETS ILLUMINATES THE EFFECTS OF AGE, MANNER OF DEATH, DISSECTION,**

1206 **AND PSYCHIATRIC DIAGNOSIS**

1207 \*Megan Hastings Hagenauer, Ph.D.<sup>1</sup>, Anton Schulmann, M.D.<sup>2</sup>, Jun Z. Li, Ph.D.<sup>3</sup>, Marquis P. Vawter,  
1208 Ph.D.<sup>4</sup>, David M. Walsh, Psy.D.<sup>4</sup>, Robert C. Thompson, Ph.D.<sup>1</sup>, Courtney A. Turner, Ph.D.<sup>1</sup>, William E.  
1209 Bunney, M.D.<sup>4</sup>, Richard M. Myers, Ph.D.<sup>5</sup>, Jack D. Barchas, M.D.<sup>6</sup>, Alan F. Schatzberg, M.D.<sup>7</sup>, Stanley J.  
1210 Watson, M.D., Ph.D.<sup>1</sup>, Huda Akil, Ph.D.<sup>1</sup>

1211

1212

1213

1214 **7.1 Detailed Methods and Results: Using Cell Type Specific Transcripts to Predict Relative Cell**

1215 **Content in Datasets from Purified Cells and Artificial Cell Mixtures**

1216 To validate our technique, we used the expression of the cell type specific transcripts included in  
1217 our database to predict the relative balance of cell types in samples with known cell content (purified cells  
1218 and artificial cell mixtures). To do this analysis, we used two RNA-Seq datasets: one derived from from  
1219 purified cortical cell types in mice (n=17: two samples per purified cell type and 3 whole brain samples:  
1220 <https://www.ncbi.nlm.nih.gov/geo/query/acc.cgi?acc=GSE52564>) (18), and one derived from 466 single-  
1221 cells dissociated from freshly-resected human cortex  
1222 (<https://www.ncbi.nlm.nih.gov/geo/query/acc.cgi?acc=GSE67835>) (2). To estimate the limitations and  
1223 noise inherent in our technique, we also constructed *in silico* mixtures of 100 cells with known  
1224 percentages of each cell type by randomly sampling from each dataset (with replacement).

1225 The RNA-Seq data that we downloaded from GEO (Gene expression Omnibus) was already in  
1226 the format of FPKM values (Fragments Per Kilobase of exon model per million mapped fragments) (18)  
1227 or counts per gene (2). To stabilize the variance in the data, we used a log transformation (base 2), and  
1228 then filtered out the data for any genes that completely lacked variation across samples (sd=0). Within the  
1229 mouse dataset (18) this filtering decreased the dataset from 22462 genes to 17148 genes. Within the  
1230 human dataset (2), this filtering decreased the dataset from 22085 genes to 21627 genes.

1231 Then, using the methods now found in the BrainInABlender package, we extracted the data for  
1232 genes previously identified as having cell type specific expression in our curated database. Within the  
1233 mouse dataset, there were data from 2513 genes that aligned with 2914 entries in our database of cell type  
1234 specific transcripts (as matched by official gene symbol). Within the human dataset, there were data from  
1235 2374 genes that aligned with 2882 entries in our database of cell type specific transcripts (as matched by  
1236 gene symbol). We centered and scaled the expression levels for each gene across samples (mean=0, sd=1)  
1237 to prevent genes with more variable signal from exerting disproportionate influence, and then, for each  
1238 sample, averaged this value across the transcripts identified in each publication as specific to a particular  
1239 cell type. This created 38 cell type signatures derived from the cell type specific genes identified by the

## Running Head: PREDICTING CELL TYPE BALANCE

1240 eight publications ("*Cell Type Indices*"), each of which predicted the relative content for one of the 10  
1241 primary cell types in our cortical samples. All of the R script documenting these analyses can be found at  
1242 [https://github.com/hagenaue/CellTypeAnalyses\\_Darmanis](https://github.com/hagenaue/CellTypeAnalyses_Darmanis) and  
1243 [https://github.com/hagenaue/CellTypeAnalyses\\_Zhang](https://github.com/hagenaue/CellTypeAnalyses_Zhang).

1244 We found that the statistical cell type indices easily predicted the cell type identities of the  
1245 original samples (**Suppl. Figure 1, Suppl. Figure 2**). This was true regardless of the publication from  
1246 which the cell type specific genes were derived: cell type specific gene lists derived from publications  
1247 using different species (human vs. mouse), platforms (microarray vs. RNA-Seq), methodologies  
1248 (florescent cell sorting vs. suspension), or statistical stringency all performed fairly equivalently, with  
1249 some minor exception. Occassionally, we found that the cell type indices associated with cell type  
1250 specific gene lists derived from TRAP methodology (15) did not properly predict the cell identity of the  
1251 samples, and in general the cell type indices associated with immature oligodendrocytes were somewhat  
1252 inconsistent. As would be expected, the cell type indices derived from cell type specific genes identified  
1253 by the same publication that produced the test datasets (2,18) were (by definition) superb predictors of the  
1254 sample cell identity in their own dataset, and were thus excluded from later validation analyses.

1255

## Running Head: PREDICTING CELL TYPE BALANCE

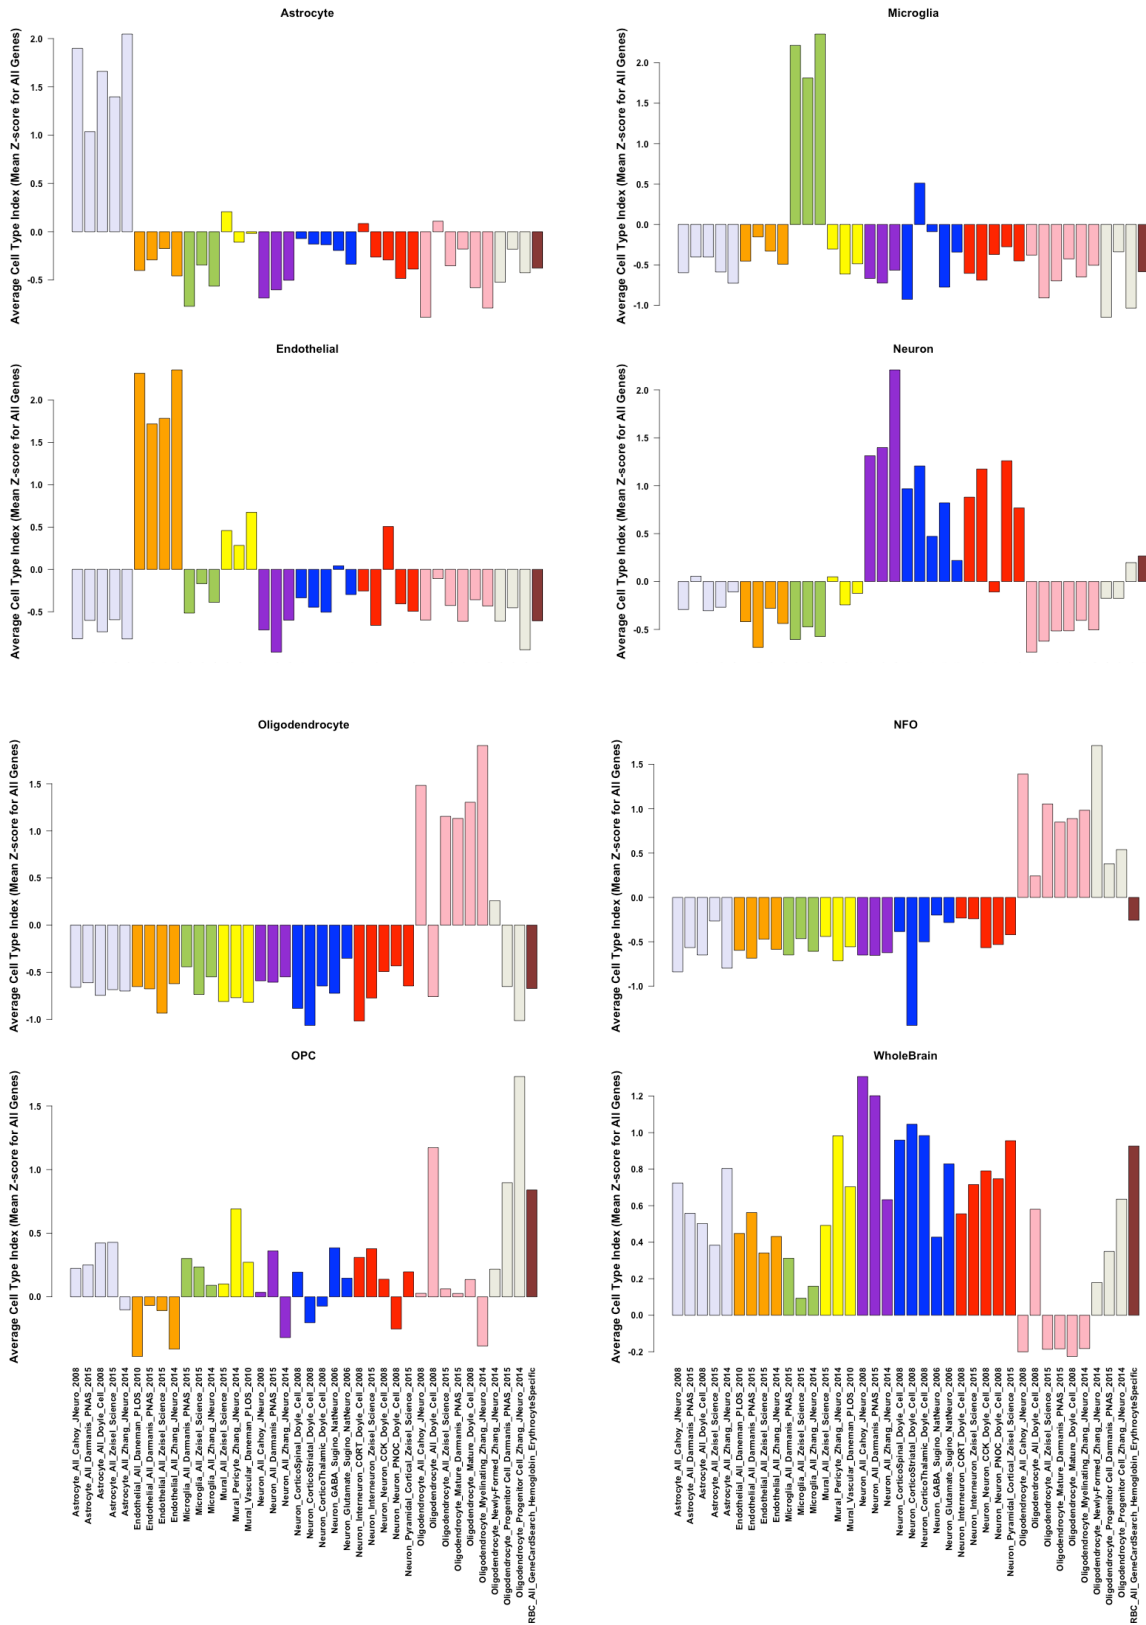

1256

1257

1258

1259 ***Suppl. Figure 1. The cell content predictions derived from cell type specific transcripts originating***  
1260 ***from different publications successfully predict sample cell type in mouse purified cell type RNA-Seq***  
1261 ***data. The sample cell type in a mouse purified cell type RNA-Seq dataset (18) was predicted equally well***  
1262 ***by cell type indices derived from cell type specific transcripts originating from publications using***  
1263 ***different species, methodologies, and platforms. The actual sample cell type is indicated in the main***  
1264 ***heading above the plot (NFO: “newly-formed oligodendrocyte”), and each bar represents the average***  
1265 ***for two samples for each cell type index (identified by primary cell type, subtype, and publication on the***  
1266 ***x-axis). The cell type indices that fall within a particular primary category of cell are further identified by***  
1267 ***color (lavender: astrocytes, orange: endothelial, green: microglia, yellow: mural, purple: neuron\_all,***  
1268 ***blue: neuron\_projection, red: neuron\_interneuron, pink: oligodendrocyte, gray: oligodendrocyte***  
1269 ***progenitor cell (OPC), brown: red blood cell (RBC)).***

1270

1271

1272

1273

1274

Running Head: PREDICTING CELL TYPE BALANCE

1275

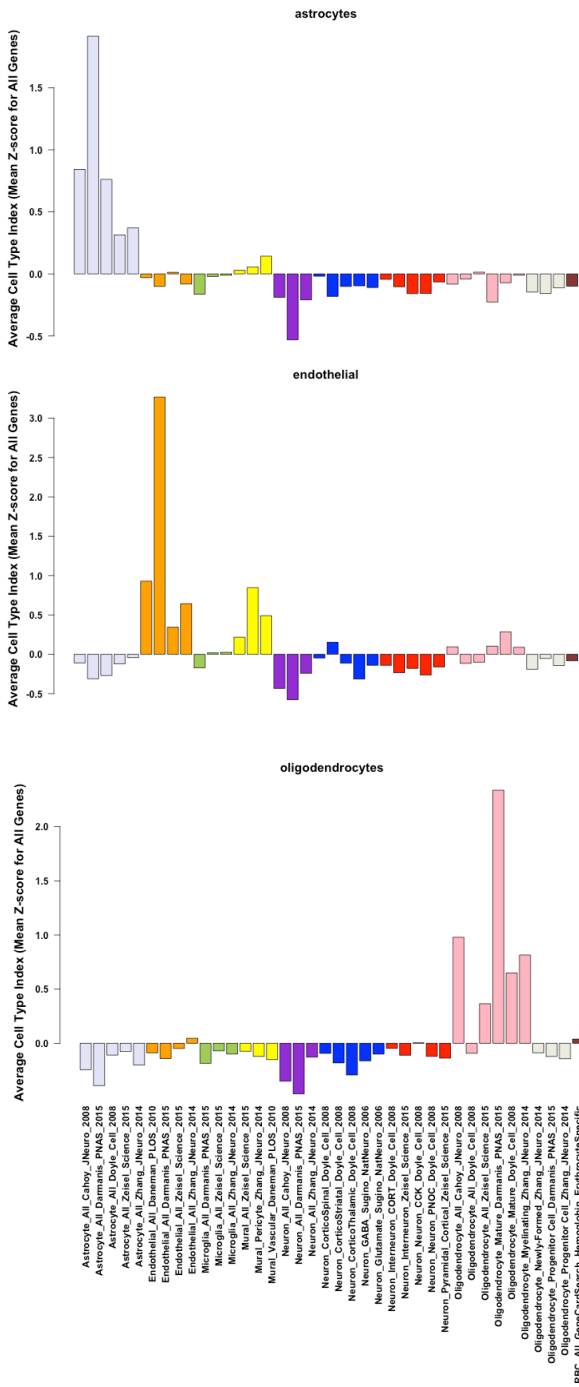

1276

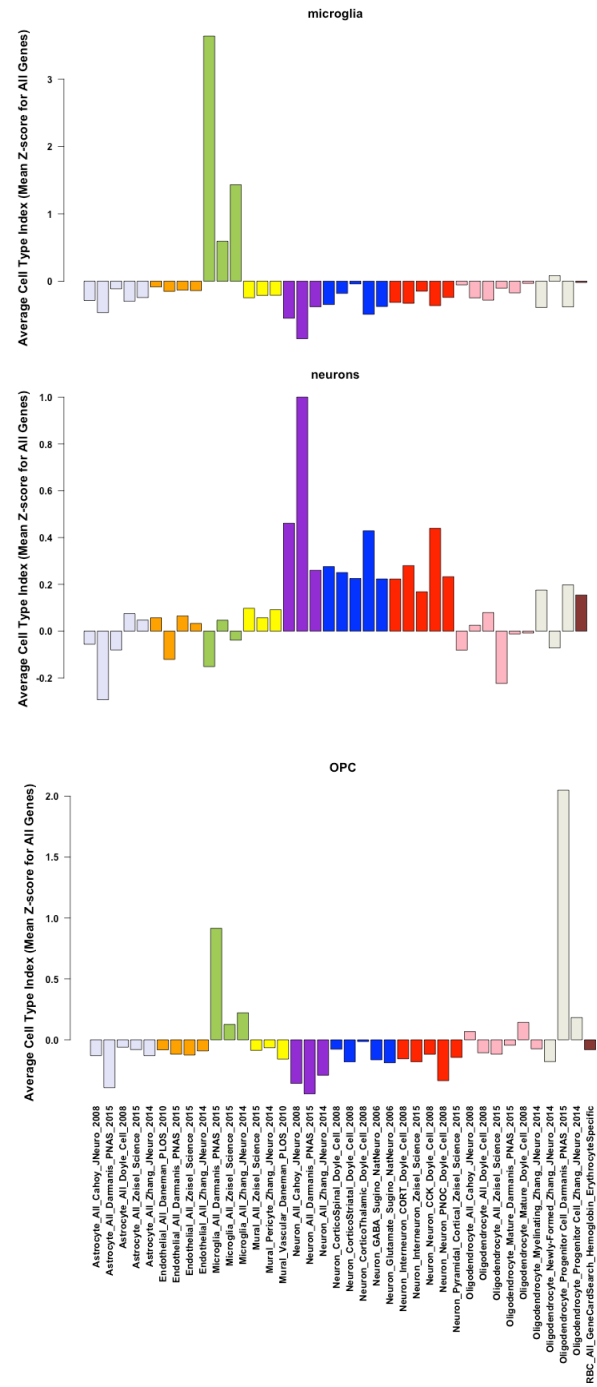

1277

1278



1279 **Suppl. Figure 2. The cell content predictions derived from cell type specific transcripts originating**  
1280 **from different publications successfully predict sample cell type in human single cell RNA-Seq data.**  
1281 *The sample cell type in a human single cell RNA-Seq dataset (2) was predicted equally well by cell type*  
1282 *indices derived from cell type specific transcripts originating from publications using different species,*  
1283 *methodologies, and platforms. The sample cell type (as identified in the publication) is indicated in the*  
1284 *main heading above the plot, and each bar represents the average cell type index (identified by primary*  
1285 *cell type, subtype, and publication on the x-axis) for all samples of that cell type. The cell type indices that*  
1286 *fall within a particular primary category of cell are further identified by color (lavender: astrocytes,*  
1287 *orange: endothelial, green: microglia, yellow: mural, purple: neuron\_all, blue: neuron\_projection, red:*  
1288 *neuron\_interneuron, pink: oligodendrocyte, gray: oligodendrocyte progenitor cell (OPC), brown: red*  
1289 *blood cell (RBC)).*

1290

1291 For further analyses, individual cell type indices were averaged within each of ten primary  
1292 categories: astrocytes, endothelial cells, mural cells, microglia, immature and mature oligodendrocytes,  
1293 red blood cells, interneurons, projection neurons, and indices derived from neurons in general, with any  
1294 genes that were identified as being specific to more than one category removed (*e.g.*, a gene identified as  
1295 being specifically expressed in both microglia and endothelial cells). This led to ten consolidated primary  
1296 cell-type indices for each sample. We then examined the relationship between these consolidated cell type  
1297 indices and actual cell content in artificial mixtures of 100 cells generated *in silico* by randomly sampling  
1298 from the purified cell datasets (with replacement). We found that the consolidated cell type indices  
1299 strongly predicted the percentage of their respective cell type included in our artificial mixtures of 100  
1300 cells in a linear manner (**Suppl. Figure 3, Suppl. Figure 4**) across a range of values likely to encompass  
1301 the true proportion of these cells in our cortical samples. The amount of noise present in these predictions  
1302 varied by data type, with the predictions generated from single-cell data having substantially more noise  
1303 than that generated from pooled, purified cells, but even the noisier data was associated with most of the  
1304 data ( $\pm 1$  stdev) falling within  $\pm 5\%$  of the prediction. Therefore, we conclude that cell type indices are  
1305 a relatively easy manner to estimate relative cell type balance across samples.

1306

1307

## Running Head: PREDICTING CELL TYPE BALANCE

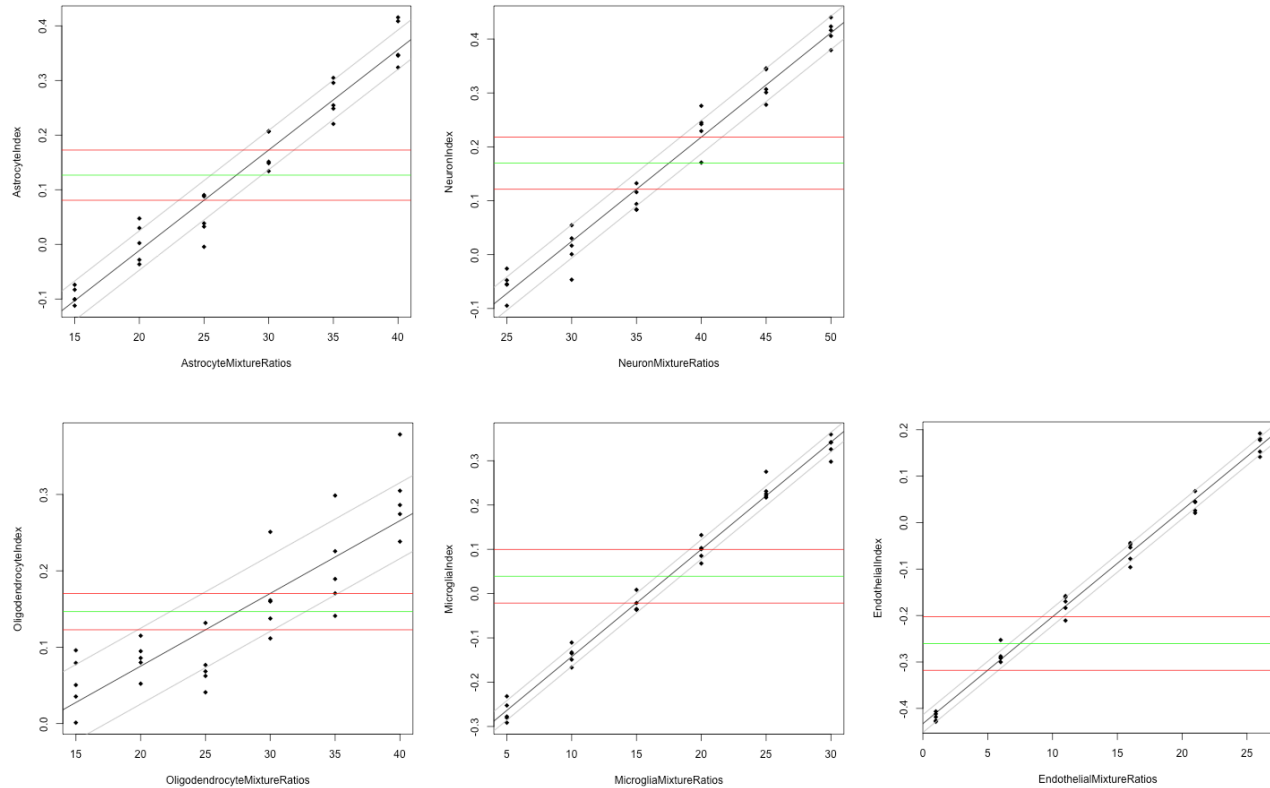

1308

1309 **Suppl. Figure 3. Cell type indices successfully predict the percentage of cells of a particular type in**  
1310 **artificial mixtures of 100 cells created using mouse purified cell type RNA-Seq data. Depicted are the**  
1311 **cell type indices (y-axis) calculated for mixed cell samples generated in silico using random sampling**  
1312 **(with replacement) from a mouse purified cell type RNA-Seq dataset (18). Each sample contains 100 cells**  
1313 **total, with a designated percentage of the cell type of interest (x-axis), with the percentages designed to**  
1314 **roughly span what might be found in cortical tissue samples. The black best fit line (as defined by a linear**  
1315 **model) is accompanied by the standard error of the regression (gray), and the green and red lines are**  
1316 **visual guides to help illustrate a 5% increase in the cell type of interest.**

1317

1318

1319

## Running Head: PREDICTING CELL TYPE BALANCE

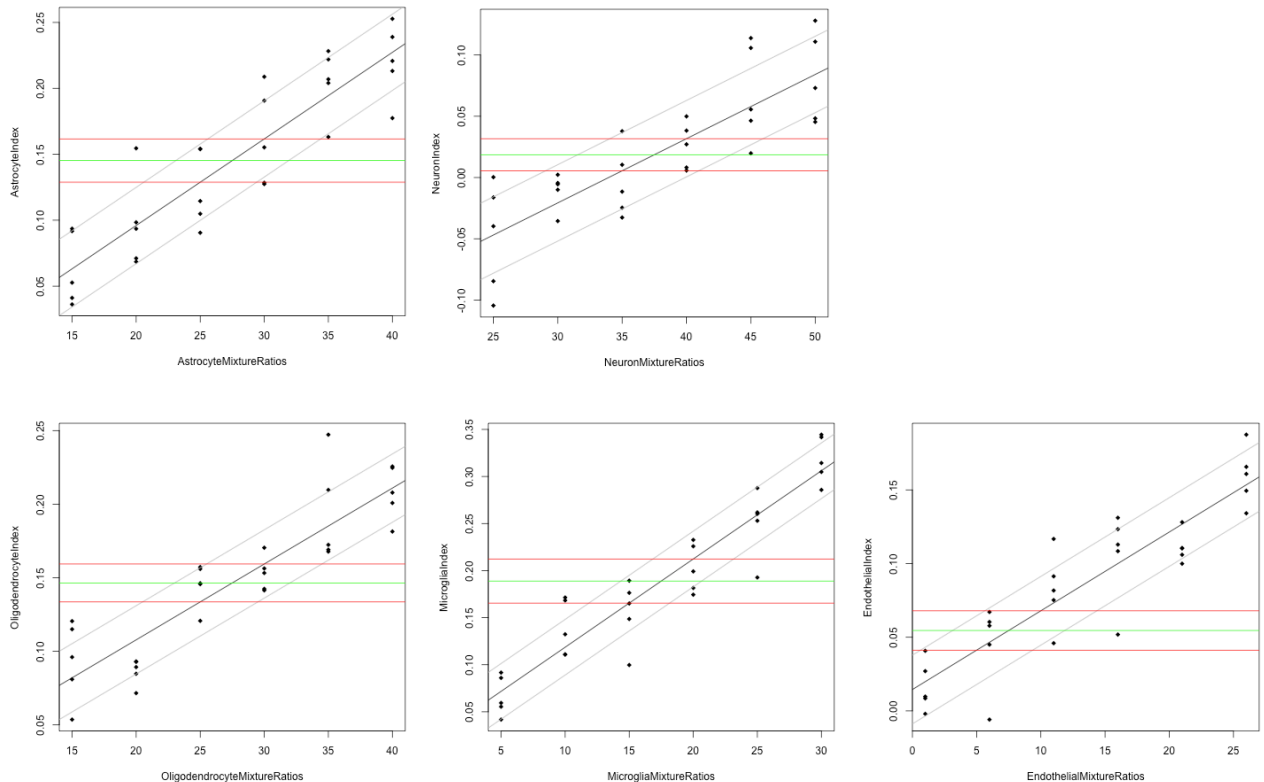

1320

1321 **Suppl. Figure 4. Cell type indices successfully predict the percentage of cells of a particular type in**  
1322 **artificial mixtures of 100 cells created using human single-cell RNA-Seq data.** Depicted are the cell  
1323 type indices (y-axis) calculated for mixed cell samples generated in silico using random sampling (with  
1324 replacement) from a human single cell RNA-Seq dataset (2). Each sample contains 100 cells total, with a  
1325 designated percentage of the cell type of interest (x-axis), with the percentages designed to roughly span  
1326 what might be found in cortical tissue samples. The black best fit line (as defined by a linear model) is  
1327 accompanied by the standard error of the regression (gray), and the green and red lines are visual guides  
1328 to help illustrate a 5% increase in the cell type of interest. Note the greater amount of variation present in  
1329 the predictions for this dataset (based on single-cell data) versus the predictions based on mouse purified  
1330 cell data (**Suppl. Figure 3**).

1331

1332 As further validation, we determined whether relative cell type balance could be accurately  
1333 deciphered from microarray data for samples containing artificially-generated mixtures of cultured cells  
1334 (GSE19380; (12)). The cells used to make these mixtures were cultured from the cerebral cortices of rat  
1335 P1 pups. The microarray profiling was then performed using a Affymetrix Rat Genome 230 2.0 Array,  
1336 We downloaded the pre-processed gene expression dataset from GEO using the R package *GEOquery*.  
1337 According to the methods published on GEO, this data had already undergone probe set summarization  
1338 and normalization using robust multi-array averaging (RMA, *affy* package), including background

## Running Head: PREDICTING CELL TYPE BALANCE

1339 subtraction, summarization by median polish, log (base 2) transformation, and quantile normalization. We  
1340 used the R package *GEOquery* to extract out the description of the cell type mixture associated with each  
1341 sample, and then used this data to construct a new matrix that contained the percent of each cell type  
1342 (columns: neuron, astrocyte, oligodendrocyte, microglia) found in each sample. We then predicted the  
1343 cell content of each sample from the microarray data using BrainInABlender, and plotted these  
1344 predictions against the actual percent of each cell type found in the mixtures. We made these plots both  
1345 for predictions derived from cell type specific gene lists from particular publications (**Suppl. Figure 6**)  
1346 and after averaging these individual cell type indices within each of ten primary categories, with any  
1347 genes that were identified as being specific to more than one category removed (*e.g.*, a gene identified as  
1348 being specifically expressed in both microglia and endothelial cells, **Suppl. Figure 5**). These results are  
1349 included in main text of paper (**Figure 3**). The code for all of these analyses can be found at:  
1350 [https://github.com/hagenaue/CellTypeAnalyses\\_KuhnMixtures/tree/master](https://github.com/hagenaue/CellTypeAnalyses_KuhnMixtures/tree/master).

1351

1352

Running Head: PREDICTING CELL TYPE BALANCE

| Cell Type Index                                       | Number of probesets in the microarray that represent cell type specific genes according to each publication | Percent that were truly specific to that cell type (not identified as "specific" to another category of cell type in a different publication) |
|-------------------------------------------------------|-------------------------------------------------------------------------------------------------------------|-----------------------------------------------------------------------------------------------------------------------------------------------|
| Astrocyte_All_Cahoy_JNeuro_2008                       | 47                                                                                                          | 87%                                                                                                                                           |
| Astrocyte_All_Darmanis_PNAS_2015                      | 14                                                                                                          | 93%                                                                                                                                           |
| Astrocyte_All_Doyle_Cell_2008                         | 12                                                                                                          | 100%                                                                                                                                          |
| Astrocyte_All_Zeisel_Science_2015                     | 181                                                                                                         | 88%                                                                                                                                           |
| Astrocyte_All_Zhang_JNeuro_2014                       | 32                                                                                                          | 78%                                                                                                                                           |
| Endothelial_All_Daneman_PLOS_2010                     | 34                                                                                                          | 76%                                                                                                                                           |
| Endothelial_All_Darmanis_PNAS_2015                    | 14                                                                                                          | 93%                                                                                                                                           |
| Endothelial_All_Zeisel_Science_2015                   | 261                                                                                                         | 90%                                                                                                                                           |
| Endothelial_All_Zhang_JNeuro_2014                     | 30                                                                                                          | 83%                                                                                                                                           |
| Microglia_All_Darmanis_PNAS_2015                      | 17                                                                                                          | 94%                                                                                                                                           |
| Microglia_All_Zeisel_Science_2015                     | 305                                                                                                         | 91%                                                                                                                                           |
| Microglia_All_Zhang_JNeuro_2014                       | 26                                                                                                          | 88%                                                                                                                                           |
| Mural_All_Zeisel_Science_2015                         | 114                                                                                                         | 93%                                                                                                                                           |
| Mural_Pericyte_Zhang_JNeuro_2014                      | 32                                                                                                          | 69%                                                                                                                                           |
| Mural_Vascular_Daneman_PLOS_2010                      | 36                                                                                                          | 64%                                                                                                                                           |
| Neuron_All_Cahoy_JNeuro_2008                          | 60                                                                                                          | 63%                                                                                                                                           |
| Neuron_All_Darmanis_PNAS_2015                         | 18                                                                                                          | 72%                                                                                                                                           |
| Neuron_All_Zhang_JNeuro_2014                          | 22                                                                                                          | 68%                                                                                                                                           |
| Neuron_CorticoSpinal_Doyle_Cell_2008                  | 17                                                                                                          | 59%                                                                                                                                           |
| Neuron_CorticoStriatum_Doyle_Cell_2008                | 16                                                                                                          | 6%                                                                                                                                            |
| Neuron_CorticoThalamic_Doyle_Cell_2008                | 14                                                                                                          | 64%                                                                                                                                           |
| Neuron_GABA_Sugino_NatNeuro_2006                      | 23                                                                                                          | 83%                                                                                                                                           |
| Neuron_Glutamate_Sugino_NatNeuro_2006                 | 48                                                                                                          | 81%                                                                                                                                           |
| Neuron_Interneuron_CORT_Doyle_Cell_2008               | 13                                                                                                          | 77%                                                                                                                                           |
| Neuron_Interneuron_Zeisel_Science_2015                | 259                                                                                                         | 90%                                                                                                                                           |
| Neuron_Neuron_CCK_Doyle_Cell_2008                     | 12                                                                                                          | 58%                                                                                                                                           |
| Neuron_Neuron_PNOC_Doyle_Cell_2008                    | 18                                                                                                          | 67%                                                                                                                                           |
| Neuron_Pyramidal_Cortical_Zeisel_Science_2015         | 189                                                                                                         | 88%                                                                                                                                           |
| Oligodendrocyte_All_Cahoy_JNeuro_2008                 | 33                                                                                                          | 94%                                                                                                                                           |
| Oligodendrocyte_All_Doyle_Cell_2008                   | 19                                                                                                          | 74%                                                                                                                                           |
| Oligodendrocyte_All_Zeisel_Science_2015               | 323                                                                                                         | 93%                                                                                                                                           |
| Oligodendrocyte_Mature_Darmanis_PNAS_2015             | 15                                                                                                          | 100%                                                                                                                                          |
| Oligodendrocyte_Mature_Doyle_Cell_2008                | 18                                                                                                          | 72%                                                                                                                                           |
| Oligodendrocyte_Myelinating_Zhang_JNeuro_2014         | 34                                                                                                          | 100%                                                                                                                                          |
| Oligodendrocyte_Newly-Formed_Zhang_JNeuro_2014        | 31                                                                                                          | 65%                                                                                                                                           |
| Oligodendrocyte_Progenitor_Cell_Darmanis_PNAS_2015    | 15                                                                                                          | 73%                                                                                                                                           |
| Oligodendrocyte_Progenitor_Cell_Zhang_JNeuro_2014     | 32                                                                                                          | 59%                                                                                                                                           |
| RBC_All_GeneCardSearch_Hemoglobin_ErythrocyteSpecific | 5                                                                                                           | 100%                                                                                                                                          |

1354 ***Suppl. Figure 5. Identifying non-specific “cell-type specific genes”: An example from dataset***  
1355 ***GSE19380 of the number of probesets that represented genes identified as cell type specific in each***  
1356 ***publication in our database vs. the percentage that were actually found to truly specific to that cell type***  
1357 ***(i.e., not identified as "specific" to another category of cell type in a different publication). The data***  
1358 ***from genes that were identified as being specific to more than one category of cell type (e.g., a gene***  
1359 ***identified as being specifically expressed in both microglia and endothelial cells) was removed before***  
1360 ***averaging the individual cell type indices within each of ten primary categories (astrocytes, endothelial***  
1361 ***cells, mural cells, microglia, immature and mature oligodendrocytes, red blood cells, interneurons,***  
1362 ***projection neurons, and indices derived from neurons in general) to create the ten consolidated primary***  
1363 ***cell-type indices used throughout our paper.***

1364

1365

1366

1367

1368

## Running Head: PREDICTING CELL TYPE BALANCE

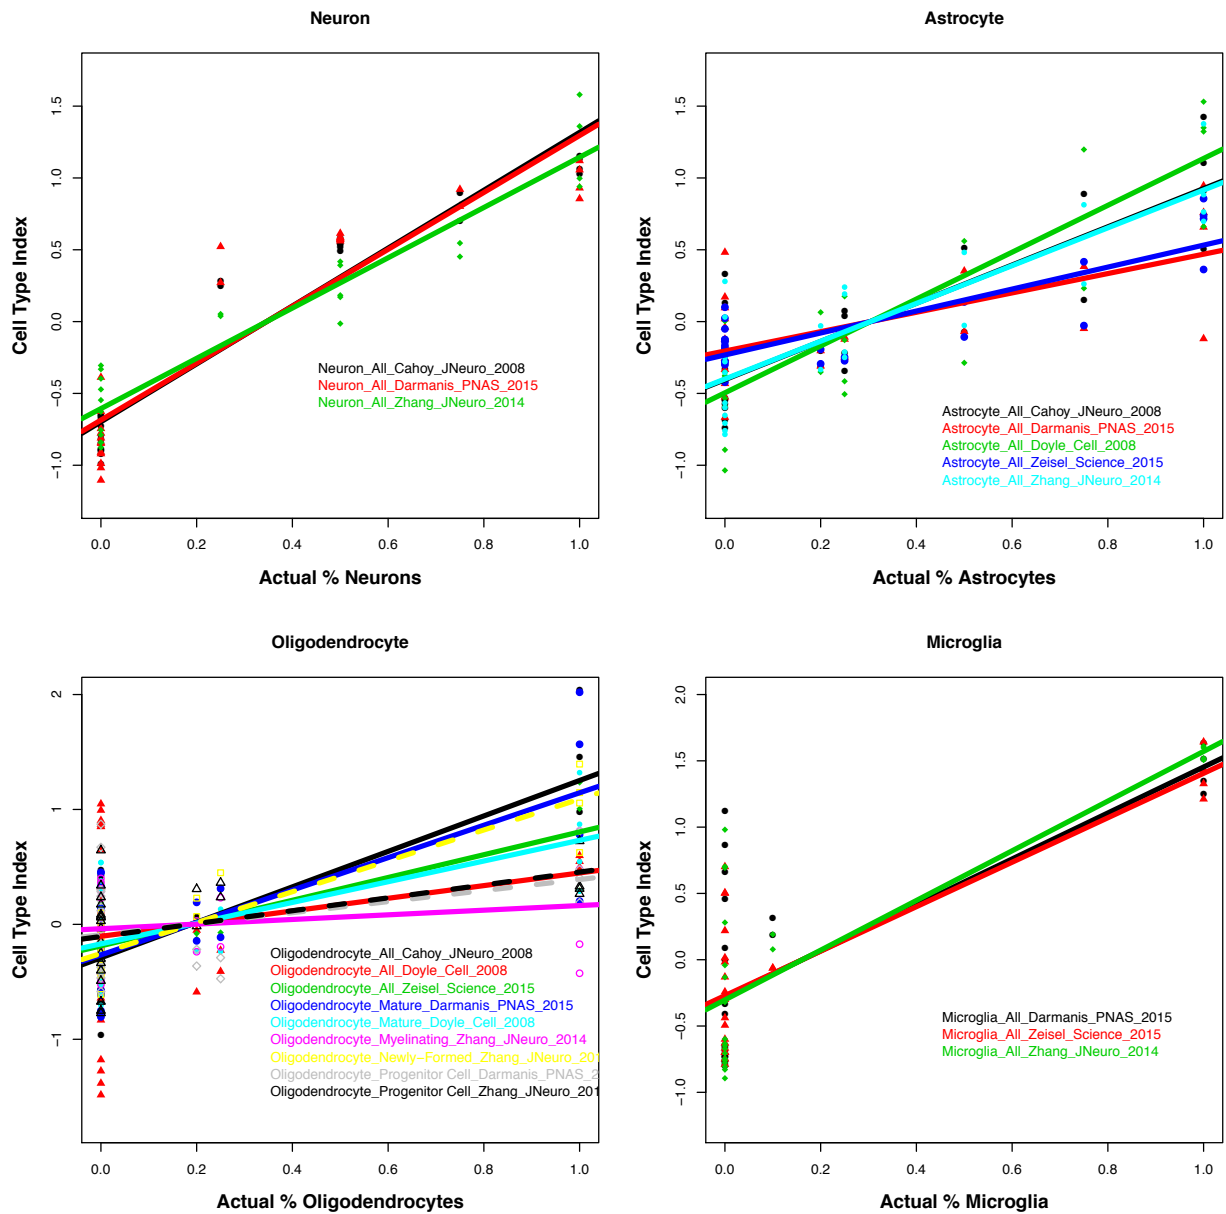

1369  
1370

1371 **Suppl. Figure 6. Validation of Relative Cell Content Predictions.** A) Using a microarray dataset  
1372 derived from samples that contained artificially-generated mixtures of cultured cells (GSE19380; (12)),  
1373 we found that our relative cell content predictions ("cell type indices") closely reflected actual known  
1374 content, except that the percentage of cultured oligodendrocytes included in the mixtures was better  
1375 predicted using cell type specific gene lists derived from immature oligodendrocytes instead of mature  
1376 oligodendrocytes.

1377

1378

1379

1380

1381

1382 **7.2 Comparison of Our Method vs. PSEA: Predicting Cell Identity in a Human Single-Cell RNA-**

1383 **Seq Dataset**

1384 Although we generated our method independently to address microarray analysis questions that arose  
1385 within the Pritzker Neuropsychiatric Consortium, we later discovered that it was quite similar to the  
1386 technique of population-specific expression analysis (PSEA) introduced by (12) with several notable  
1387 differences. Similar to our method, PSEA is a carefully-validated analysis method which aims to estimate  
1388 cell type-differentiated disease effects from microarray data derived from brain tissue of heterogeneous  
1389 composition and approaches this problem by including the averaged, normalized expression of cell type  
1390 specific markers within a larger linear model that is used to estimate differential expression in microarray  
1391 data (10–12). Analyses using PSEA similarly indicated that individual variability in neuronal, astrocytic,  
1392 oligodendrocytic, and microglial cell content was sufficient to account for substantial variability in the  
1393 vast majority of probe sets in microarray data from human brain samples, even within non-diseased  
1394 samples (12). The differences between our techniques are mostly due to the recent growth of the literature  
1395 documenting cell type specific expression in brain cell types. PSEA uses a very small set of markers (4-7)  
1396 to represent each cell type, and screens these markers for tight co-expression within the dataset of interest,  
1397 since co-expression networks have been previously demonstrated to often represent cell type signatures in  
1398 the data (92). This is essential for the analysis of microarray data for brain regions that have not been well  
1399 characterized for cell type specific expression (e.g., the substantia nigra), but risks the possibility of  
1400 closely tracking variability in a particular cell function instead of cell content (as described in our results  
1401 related to aging). Our analysis predominantly focused on the well-studied cortex, thus enabling us to  
1402 expand our analysis to include hundreds of cell type specific markers derived from a variety of  
1403 experimental techniques.

1404 Our manner of normalizing data also differs: PSEA normalizes the expression values for each gene by  
1405 dividing by the average expression of that gene across samples, whereas we use z-score normalization,



## Running Head: PREDICTING CELL TYPE BALANCE

1406 both at the level of the individual transcript and later at the level of the gene level summary data. Due to  
1407 the dependence of PSEA on ratios, genes that have average expression values that are close to zero can  
1408 end up with normalized values that are extremely high for a handful of samples. For microarray data, this  
1409 form of normalization should function well because  $\log_2$  expression values rarely drop below 5.  
1410 However, within RNA-Seq, counts of zero are quite common and therefore we suspected that the ratio-  
1411 form of normalization used by PSEA might not function optimally for this data type.

1412 Therefore, we decided to run a head-to-head comparison of our method and PSEA using a single-  
1413 cell RNA-Seq dataset derived from freshly-resected human cortex (2). To make the comparison as  
1414 interpretable as possible, we used the same list of cell type specific genes for both methods: the cell type  
1415 specific genes remaining in our database following the removal of all transcripts that were found to be  
1416 “specifically expressed” in multiple categories of cell types (e.g., a transcript that is “specific” to both  
1417 astrocytes and neurons). In order to avoid circular reasoning, we also did not include any cell type  
1418 specific genes that had originally been identified by the publication currently used as the test dataset (2).  
1419 Then we extracted the variance-stabilized and filtered data (see **Section 7.1**) for the cell type specific  
1420 genes. For PSEA, we downloaded the PSEA package from Bioconductor  
1421 (<https://www.bioconductor.org/packages/release/bioc/vignettes/PSEA/inst/doc/PSEA.pdf>) and used the  
1422 `marker()` function to calculate the “Reference Signal” for the most common primary categories of cell  
1423 types (astrocytes, endothelial cells, microglia, mature oligodendrocytes, and neurons in general). For our  
1424 method, we used a procedure similar to that used in the manuscript. We applied a z-score transformation  
1425 to the data for each gene (mean=0, sd=1), and then either averaged by the primary cell type category (to  
1426 conduct an analysis most similar to PSEA), or averaged the data from the cell type specific genes  
1427 identified by each publication, followed by averaging by primary cell type category (to create  
1428 consolidated cell type indices similar to those used in most of our manuscript).

1429 To compare the efficacy of each method, we ran a linear model to determine the percentage of  
1430 variation in the population “reference signal” (PSEA) or “cell type index” (our method) accounted for by  
1431 the cell type identities assigned to each cell in the original publication (2). We found that both the

## Running Head: PREDICTING CELL TYPE BALANCE

1432 population reference signals (PSEA) and cell type indices (our method) for each cell were strongly related  
1433 to their previously-assigned cell type identity, but in general the relationship was stronger when using our  
1434 method: on average, 34% of the variation in the reference signal for each cell type was accounted for by  
1435 cell identity, whereas an average of either 45% or 49% of the variation in our cell type indices was  
1436 accounted for by cell identity using either the simplified or consolidated versions of our method,  
1437 respectively (**Suppl. Figure 7**). An illustration of this improvement can be found in **Suppl. Figure 8**: note  
1438 the presence of extreme outliers in the population reference signal when using the PSEA method. We  
1439 conclude that the simple use of a different normalization method is sufficient to make our method a more  
1440 effective manner of predicting cell type balance in some datasets. We also find that averaging the  
1441 predictions drawn from the cell type specific genes identified by multiple publications into a consolidated  
1442 index produces some additional improvement.  
1443

1444

**Method of deriving a statistical cell type signal:**

| <b>Signal from cell type specific genes for:</b> | <b>PSEA (mean signal ratio average)</b> | <b>Our Cell Type Indices (z-score average)</b> | <b>Our Cell Type Indices: After first averaging by Publication</b> |
|--------------------------------------------------|-----------------------------------------|------------------------------------------------|--------------------------------------------------------------------|
| Astrocytes                                       | 34%                                     | 52%                                            | 57%                                                                |
| Oligodendrocytes                                 | 38%                                     | 45%                                            | 50%                                                                |
| Microglia                                        | 36%                                     | 42%                                            | 51%                                                                |
| Endothelial                                      | 30%                                     | 28%                                            | 33%                                                                |
| Neurons                                          | 33%                                     | 57%                                            | 53%                                                                |

1445

1446 **Suppl. Figure 7. The method for deriving predicted relative cell content determines the strength of the**  
 1447 **relationship with sample cell type.** Depicted below is a comparison of the efficacy of three different  
 1448 manners of predicting the relative cell content of samples (columns) in a human single-cell RNA-seq  
 1449 dataset (2): 1) the “population reference signal” generated by PSEA, 2) a simplified version of our  
 1450 method that is meant to be relatively analogous to PSEA (a simple average of the z-score-transformed  
 1451 data for all genes specific to a particular cell type in our database), 3) the version of our method used in  
 1452 this manuscript, which consolidates the predictions derived from the cell type specific genes identified in  
 1453 different publications. For the predicted relative content of each of the major cell types (rows) derived  
 1454 using these different methods, the table provides the percentage of variation (*r*-squared) that is accounted  
 1455 for by the original cell type identities of the samples provided by the publication (2). Overall, there is a  
 1456 strong relationship between the predictions generated by all methods and sample cell type identity, but  
 1457 the method used in this manuscript produces predictions that best fit sample cell type.

1458

## Running Head: PREDICTING CELL TYPE BALANCE

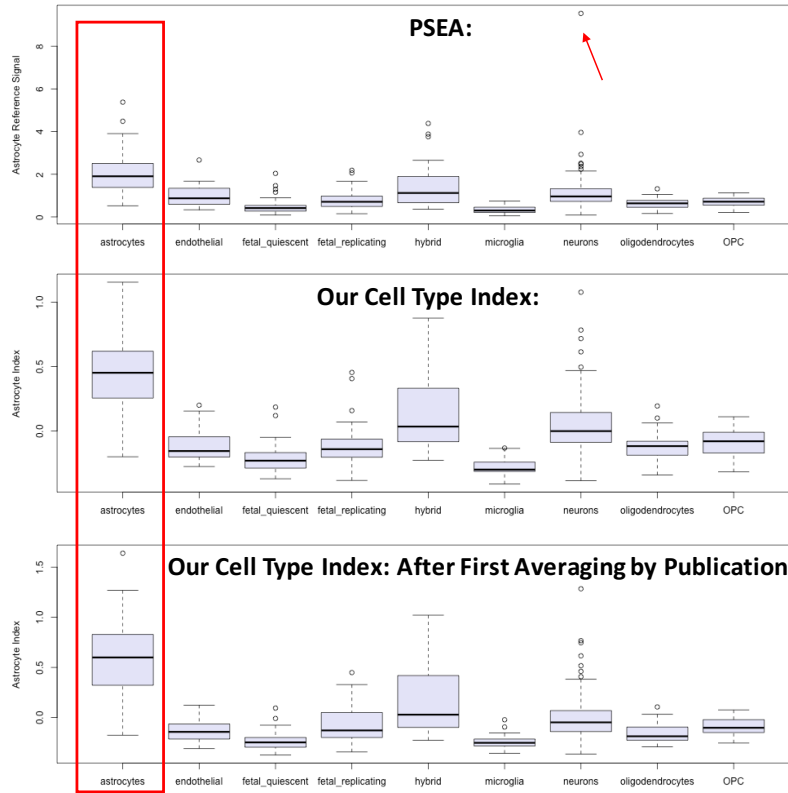

1459

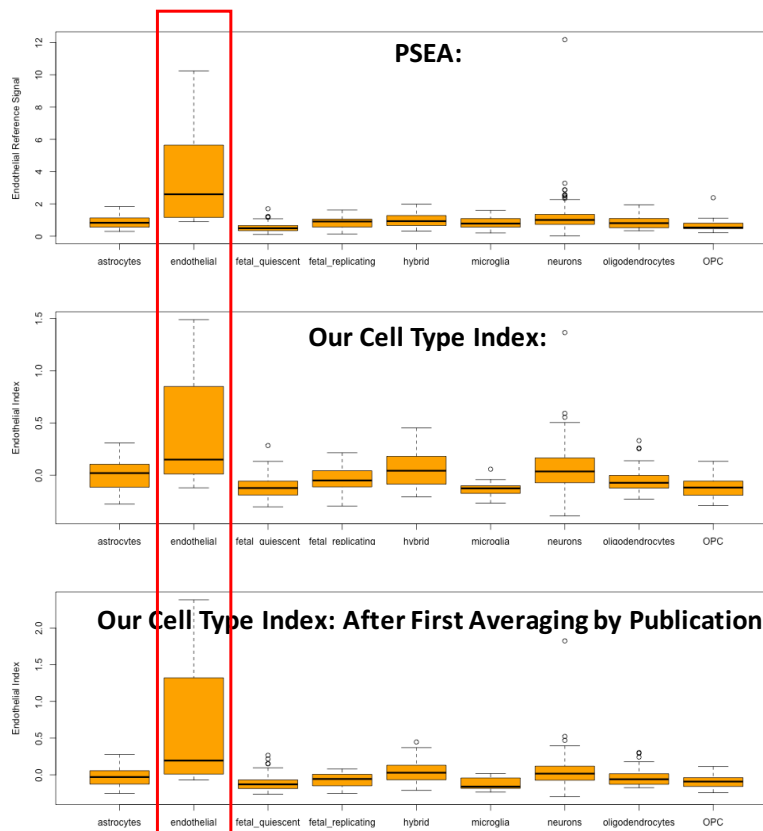

1460

## Running Head: PREDICTING CELL TYPE BALANCE

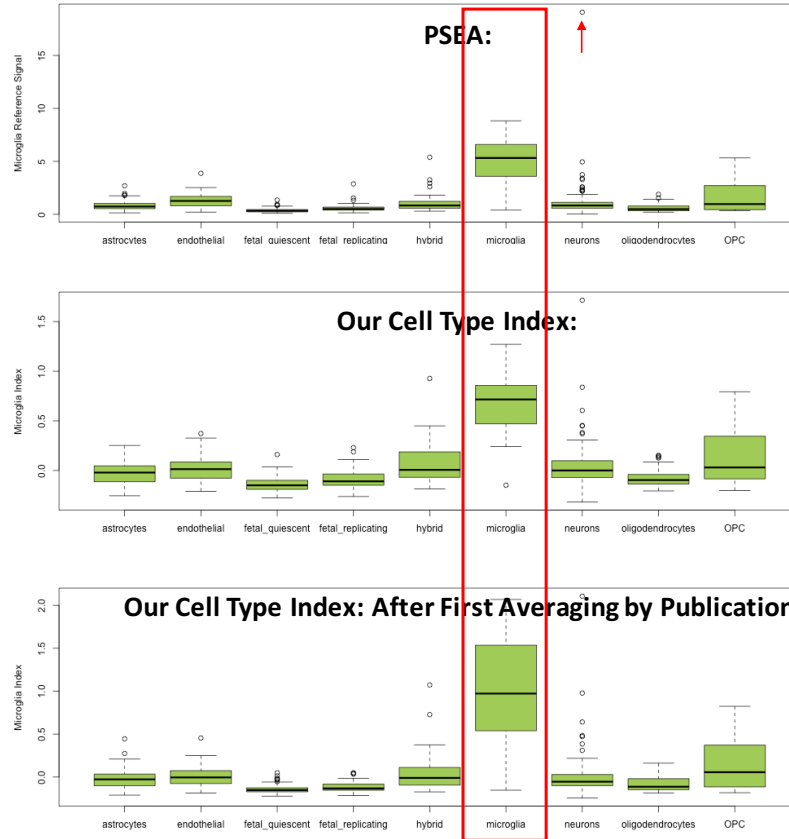

1461

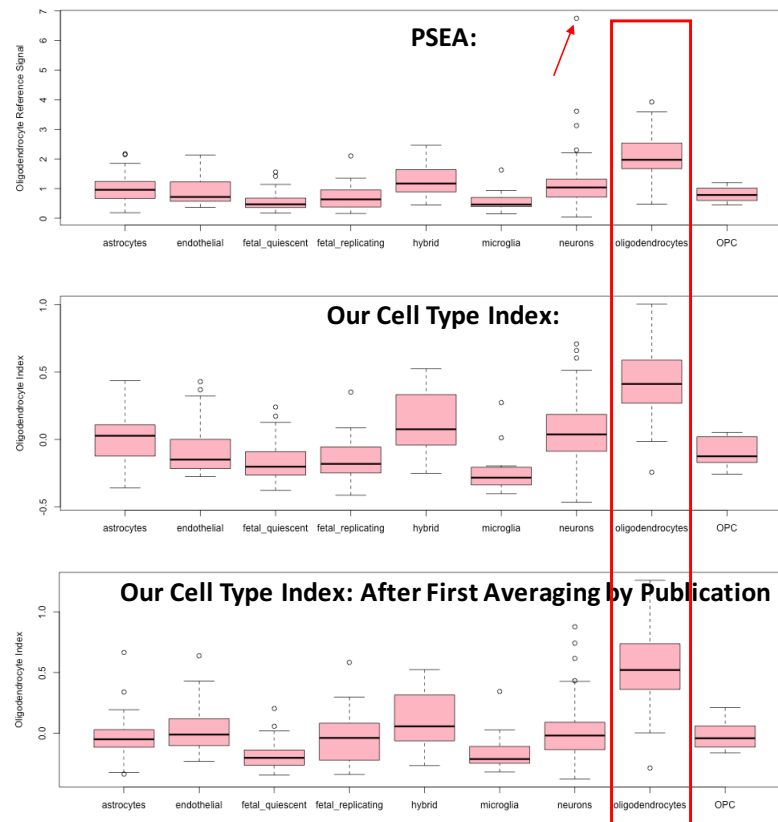

1462

## Running Head: PREDICTING CELL TYPE BALANCE

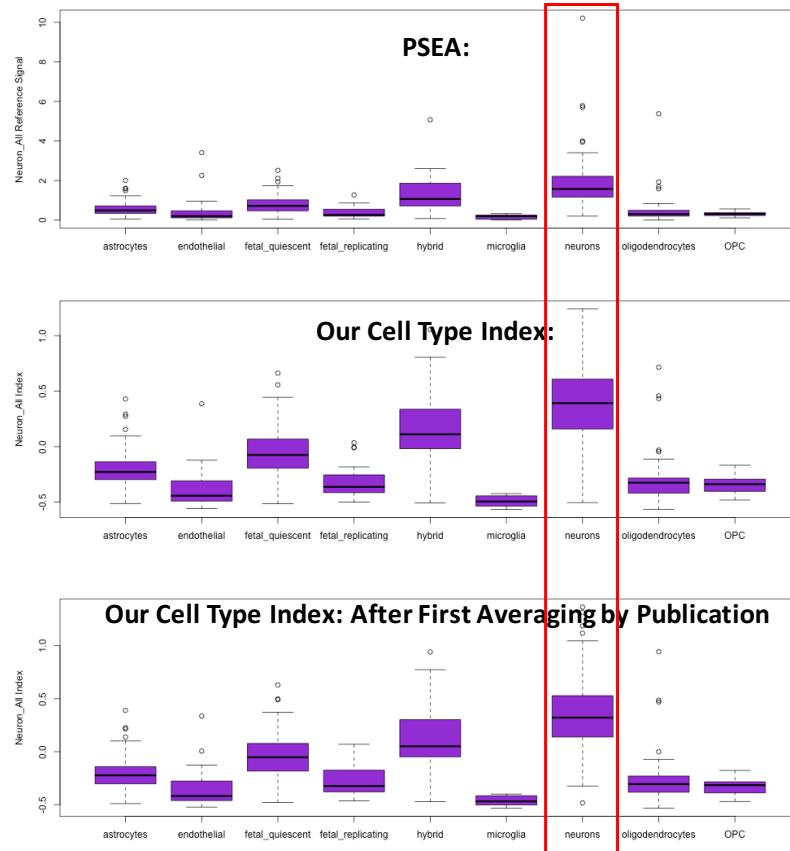

1463

1464 **Suppl. Figure 8. The method for deriving predicted relative cell content determines the strength of the**  
1465 **relationship with sample cell type.** Depicted below is a comparison of the efficacy of three different  
1466 manners of predicting the relative cell content of samples (columns) in a human single-cell RNA-seq  
1467 dataset (2): 1) the “population reference signal” generated by PSEA, 2) a simplified version of our  
1468 method that is meant to be relatively analogous to PSEA (a simple average of the z-score-transformed  
1469 data for all genes specific to a particular cell type in our database), 3) the version of our method used in  
1470 this manuscript, which consolidates the predictions derived from the cell type specific genes identified in  
1471 different publications. Boxplots illustrate the distribution of the relative cell content predictions across  
1472 samples identified as different cell types in the original publication (2). Lavender: astrocytes, orange:  
1473 endothelial cells, green: microglia, pink: oligodendrocytes, purple: neurons. Note the presence of several  
1474 extreme outliers (red) in the predictions produced by PSEA.

1475

1476 Using similar methodology, we also calculated the population “reference signal” with PSEA for  
1477 microarray data from artificially-created mixtures of cultured cells (GSE19380 – see discussion of data  
1478 preprocessing in **Section 7.1**). The results strongly tracked the actual cell content of the mixed samples  
1479 (**Suppl. Figure 9**) in a manner that was not strikingly better or worse than the predictions made using  
1480 BrainInABlender for the same dataset (**Figure 3**). This again drives home the fact that the ratio-based

Running Head: PREDICTING CELL TYPE BALANCE

1481 normalization methods used in PSEA are particularly incompatible with low count data in RNA-Seq –

1482 results derived from microarray data are fine.

1483

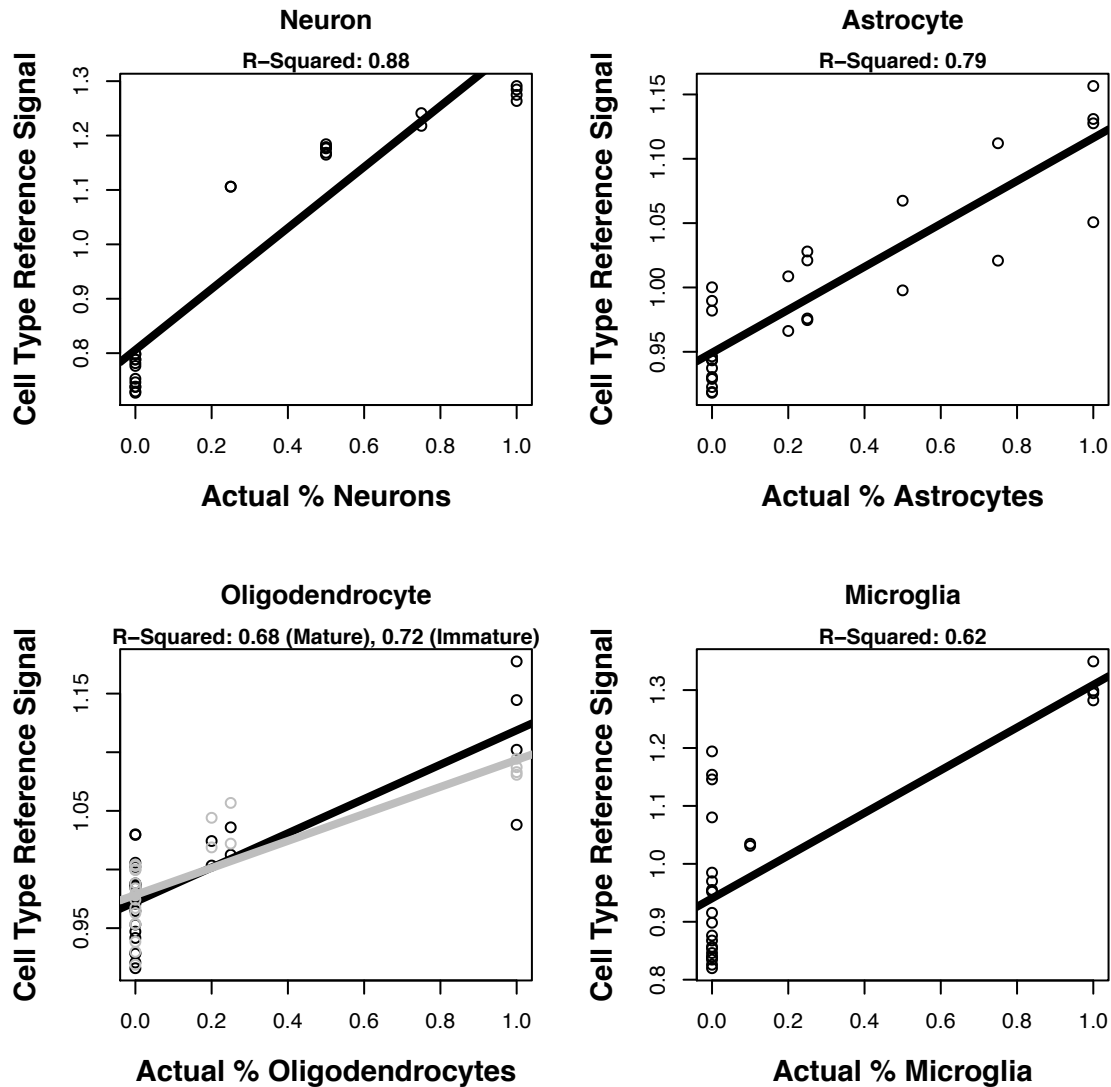

1484

1485 **Suppl. Figure 9. Relative cell content predictions made using PSEA and our cell type specific gene**  
1486 **lists.** Using a microarray dataset derived from samples that contained artificially-generated mixtures of  
1487 cultured cells (GSE19380; (12)), we found that the relative cell content predictions (“cell type reference  
1488 signal”) produced by PSEA closely reflected actual known content, similar to the predictions made by  
1489 BrainInAblender (Figure 3).

1490

1491

1492 **7.3 Additional Detailed Preprocessing Methods for the Macro-Dissected Microarray Datasets**

1493

1494 **7.3.1 Pritzker Dorsolateral Prefrontal Cortex Microarray Dataset (GSE92538)**

1495 The original dataset included tissue from 172 high-quality human post-mortem brains donated to  
1496 the Brain Donor Program at the University of California, Irvine with the consent of the next of kin.  
1497 Frozen coronal slabs were macro-dissected to obtain dorsolateral prefrontal cortex samples. Clinical  
1498 information was obtained from medical examiners, coroners' medical records, and a family member.  
1499 Patients were diagnosed with either Major Depressive Disorder, Bipolar Disorder, or Schizophrenia by  
1500 consensus based on criteria from the Diagnostic and Statistical Manual of Mental Disorders (93). Due to  
1501 the extended nature of this study, this sample collection occurred in waves ("cohorts") over a period of  
1502 many years. This research was overseen and approved by the University of Michigan Institutional Review  
1503 Board (IRB # HUM00043530, Pritzker Neuropsychiatric Disorders Research Consortium (2001-0826))  
1504 and the University of California Irvine (UCI) Institutional Review Board (IRB# 1997-74).

1505 As described previously (32,35), total RNA from these samples was then distributed to  
1506 laboratories at three different institutions (University of Michigan (UM), University of California-Davis  
1507 (UCD), University of California-Irvine (UCI)) to be hybridized to either Affymetrix HT-U133A or HT-  
1508 U133Plus-v2 chips (1-5 replicates per sample, n=367). Before conducting the current analysis, the subset  
1509 of probes found on both the Affymetrix HT-U133A and HT-U133Plus-v2 chips was extracted,  
1510 reannotated for probe-to-transcript correspondance (94), summarized using robust multi-array analysis  
1511 (RMA) (34), log (base 2)-transformed, quantile normalized, and gender-checked. Then, 15 batches of  
1512 highly-correlated samples were identified that were defined a combination of cohort, chip, and laboratory  
1513 **(Suppl. Figure 10).**



## Running Head: PREDICTING CELL TYPE BALANCE

| Batch# | Site | Chip      | Cohort           | Control | BP | MDD | SCHIZ |
|--------|------|-----------|------------------|---------|----|-----|-------|
| 1      | UCD  | U133A     | Dep Cohort 1 & 2 | 20      | 9  | 11  | 0     |
| 2      | UCD  | U133A     | Dep Cohort 3     | 11      | 6  | 5   | 0     |
| 3      | UCD  | U133A     | Dep Cohort 4     | 16      | 4  | 7   | 0     |
| 4      | UCD  | U133Plus2 | Dep Cohort 5     | 13      | 5  | 10  | 0     |
| 5      | UCD  | U133A     | Schiz Cohort 1   | 9       | 0  | 0   | 9     |
| 6      | UCD  | U133Plus2 | Schiz Cohort 1   | 8       | 0  | 0   | 8     |
| 7      | UCD  | U133Plus2 | Schiz Cohort 2   | 8       | 0  | 0   | 10    |
| 8      | UCI  | U133A     | Schiz Cohort 1   | 9       | 0  | 0   | 9     |
| 9      | UM   | U133A     | Dep Cohort 1     | 16      | 10 | 9   | 0     |
| 10     | UM   | U133A     | Dep Cohort 2     | 3       | 2  | 5   | 0     |
| 11     | UM   | U133A     | Dep Cohort 3 & 4 | 27      | 11 | 11  | 0     |
| 12     | UM   | U133Plus2 | Dep Cohort 5     | 13      | 5  | 10  | 0     |
| 13     | UM   | U133Plus2 | Dep Cohort 6     | 7       | 2  | 9   | 3     |
| 14     | UM   | U133A     | Schiz Cohort 1   | 9       | 0  | 0   | 9     |
| 15     | UM   | U133Plus2 | Schiz Cohort 2   | 9       | 0  | 0   | 10    |

1514

1515 **Suppl. Figure 10. The number of microarray chips run in each batch, defined by processing site,**  
1516 **Affymetrix chip type, and sample collection cohort. Samples from the four diagnostic categories**  
1517 **(Control, Bipolar Disorder, Major Depressive Disorder, Schizophrenia) were unevenly distributed across**  
1518 **batches.**

1519

1520 Samples that exhibited markedly low average sample-sample correlation coefficients (<0.85:  
1521 outliers) were removed from the dataset, including data from one batch that exhibited overall low sample-  
1522 sample correlation coefficients with other batches and was a poor match with their duplicate microarrays  
1523 run in a separate laboratory. The batch effects were then subtracted out using median-centering (detailed  
1524 procedure: (35)) and the replicate samples were averaged for each subject. Our current analyses began  
1525 with this sample-level summary gene expression data (publicly available in the Gene Expression  
1526 Omnibus, GEO: GSE92538). We further removed data from any subjects lacking information regarding  
1527 critical pre- or post-mortem variables necessary for our analysis, leaving a final sample size of n=157. All  
1528 of the R script documenting these analyses can be found at

1529 [https://github.com/hagenaue/CellTypeAnalyses\\_PritzkerAffyDLPFC](https://github.com/hagenaue/CellTypeAnalyses_PritzkerAffyDLPFC).

1530

1531

1532

1533

1534

1535 **7.3.2 Allen Brain Atlas Cross-Regional Microarray Dataset**

1536 The Allen Brain Atlas microarray data was downloaded from <http://human.brain->  
1537 [map.org/microarray/search](http://human.brain-map.org/microarray/search) on December 2015. This microarray survey was performed in brain-specific  
1538 batches, with multiple batches per subject. To remove technical variation across batches, a variety of  
1539 normalization procedures had been performed by the original authors both within and across batches  
1540 using internal controls, as well as across subjects (28). The dataset available for download had already  
1541 been log-transformed (base 2) and converted to z-scores using the average and standard deviation for each  
1542 probe. These normalization procedures were designed to remove technical artifacts while best preserving  
1543 cross-regional effects in the data, but the full information about relative levels of expression within an  
1544 individual sample were unavailable and the effects of subject-level variables (such as age and pH) were  
1545 likely to be de-emphasized due to the inability to fully separate out subject and batch during the  
1546 normalization process.

1547 Prior to conducting other analyses, we averaged the expression level of the multiple probes that  
1548 corresponded to the same gene, and re-scaled, so that the data associated with each gene symbol  
1549 continued to be a z-score (mean=0, sd=1). The 30,000 probes mapped onto 18,787 unique genes (as  
1550 determined by gene symbol). We then extracted the z-score data for the list of cell type specific genes  
1551 derived from each publication (1608 total). Then, based on our results from analyzing the Pritzker dataset,  
1552 we excluded the data for genes that were non-specific (i.e., included in a list of cell type specific genes  
1553 from a different category of cells within any of the publications), and then averaged the data from the  
1554 cell-type specific genes derived from each publication to predict the relative content of each of the 10  
1555 primary cell types in each sample. All of the R script documenting these analyses can be found at  
1556 [https://github.com/hagenaue/CellTypeAnalyses\\_AllenBrainAtlas](https://github.com/hagenaue/CellTypeAnalyses_AllenBrainAtlas).

1557

1558

1559 **7.3.3 Human Cortical Microarray Dataset GSE53987 (submitted to GEO by Lanz et al. (36))**

1560 The full publicly-available dataset GSE53987 (described in (36)) contained Affymetrix  
1561 U133Plus2 microarray data from 205 post-mortem human brain samples from three brain regions: the  
1562 DLPFC (Brodmann Area 46, focusing on gray matter only (Lanz T.A., *personal communication*)), the  
1563 hippocampus, and the striatum. These samples were collected by the University of Pittsburgh brain bank.  
1564 For the purposes of our current analysis, we only downloaded the microarray .CEL files for the  
1565 dorsolateral prefrontal cortex samples. We summarized these data with robust multi-array analysis  
1566 (RMA) (from the R package *affy* (34)) using a custom up-to-date chip definition file (.cdf) to define  
1567 probe-to-transcript correspondence (“hgu133plus2hsentrezgcdf\_19.0.0.tar.gz” from [http://nmg-  
1569 r.bioinformatics.nl/NuGO\\_R.html](http://nmg-<br/>1568 r.bioinformatics.nl/NuGO_R.html) (94)). This process included background subtraction, log (base 2)-  
1569 transformation, and quantile normalization. Gene Symbol annotation for probeset Entrez gene ids were  
1570 provided by the R package *org.Hs.eg.db*. We extracted the sample characteristics from the GEO website  
1571 using the R package *GEOquery*. To control for technical variation, the sample processing batches were  
1572 estimated using the microarray chip scan dates extracted from the microarray .CEL files (using the  
1573 function *protocolData* in the *GEOquery* package), but it appeared that all chips for the DLPFC were on  
1574 the same date. RNA degradation was estimated using the R package *AffyRNADegradation* (39). During  
1575 quality control, two samples were removed - GSM1304979 had a range of sample-sample correlations  
1576 that was unusually low compared (median=0.978) compared to range for the dataset as a whole (median:  
1577 0.993) and GSM1304953 appeared to be falsely identified as female (signal for XIST<7). We then  
1578 predicted the cell content of each sample from the microarray data using *BrainInAblender*. The code for  
1579 all analyses can be found at:

1580 [https://github.com/hagenaue/CellTypeAnalyses\\_LanzHumanDLPFC/tree/master](https://github.com/hagenaue/CellTypeAnalyses_LanzHumanDLPFC/tree/master)

1581

1582 **7.3.4 Human Cortical Microarray Dataset GSE21138 (submitted to GEO by Narayan et al. (38))**

1583 The publicly-available dataset GSE21138 (described in (38)) contained Affymetrix U133Plus2  
1584 microarray data from 59 post-mortem human brain samples from the DLPFC (Brodmann Area 46, gray

1585 matter only (Thomas E.A., *personal communication*) collected by the Mental Health Research Institute  
1586 in Victoria, Australia. The procedures for data download and pre-processing were identical to those used  
1587 above for GSE53987 with a few minor exceptions. In particular, there were six separate scan dates  
1588 associated with the microarray .CEL files, but one of these scan dates was not included as a co-variate in  
1589 our analyses because it had an n=1 (“06/14/06”). During quality control, the data for two subjects because  
1590 they appeared to be falsely-identified as male (XIST>7, GSM528839 & GSM528840) , and one subject  
1591 that appeared to be falsely-identified as female (XIST<7, GSM528880). Data for two more subjects were  
1592 removed as outliers due to having an unusually low range of sample-sample correlations (GSM528866,  
1593 GSM528873) as compared to the dataset as a whole. The code for all analyses can be found at:  
1594 [https://github.com/hagenaue/CellTypeAnalyses\\_NarayanHumanDLPFC](https://github.com/hagenaue/CellTypeAnalyses_NarayanHumanDLPFC).

1595

### 1596 **7.3.5 Human Cortical Microarray Dataset GSE21935 (submitted to GEO by Barnes et al. (37))**

1597 The publicly-available dataset GSE21935 (described in (37)) contained Affymetrix U133Plus2  
1598 microarray data from 42 post-mortem human brain samples from the temporal cortex (Brodmann Area  
1599 22) collected at the Charing Cross campus of the Imperial College of London. The procedures for data  
1600 download and pre-processing were identical to those used above for GSE53987 with a few minor  
1601 exceptions. In particular, there were two separate scan dates associated with the microarray .CEL files,  
1602 but they were closely spaced (6/25/04 vs. 6/29/04) and we did not find any strong association between  
1603 scan date and any of the top principal components of variation in the data, so we opted to not include scan  
1604 date as a co-variate in our statistical models. Quality control did not identify any problematic samples.  
1605 The code for all analyses can be found at:

1606 [https://github.com/hagenaue/CellTypeAnalyses\\_BarnesHumanCortex/tree/master](https://github.com/hagenaue/CellTypeAnalyses_BarnesHumanCortex/tree/master).

1607

1608 **7.3.6 CommonMind Consortium Human Cortical RNA-Seq Dataset**

1609 The CommonMind Consortium (CMC) RNA-seq dataset profiled prefrontal cortex samples from 603  
1610 individuals (40) collected at three brain banks: Mount Sinai School of Medicine, University of Pittsburgh,  
1611 and University of Pennsylvania. This dataset was downloaded as GRCh37-aligned bam files from the  
1612 CommonMind Consortium Knowledge Portal (<https://www.synapse.org/CMC>). Tophat-aligned bam files  
1613 were converted back to fastq format and mapped to GRCh38 using HISAT2 (41) with default settings.  
1614 Reads mapping uniquely to exons were then counted using subread featureCounts with ensembl transcript  
1615 models. RNA-seq read counts were analyzed using limma/voom (42); cell type indices were calculated on  
1616 logCPM values, and analysis of differential gene expression was performed using limma with observed  
1617 precision weights in a weighted least squares linear regression. Prior to upload, poor quality samples from  
1618 the original dataset (40) had already been removed (<50 million reads, RIN<5.5) and replaced with higher  
1619 quality samples. We further excluded data from 10 replicates and 89 individuals with incomplete  
1620 demographic data (missing pH), leaving a final sample size of 514 samples. The dataset was further  
1621 filtered using an expression threshold (CPM>1 in at least 50 individuals) which reduced the dataset from  
1622 including data from all annotated genes (about 60,000) to data from around 17,000 genes.

1623

1624

1625 **7.4 Additional figures and results: Does the Reference Dataset Matter? There is a Strong**  
1626 **Convergence of Cell Content Predictions Derived from Cell Type Specific Transcripts**  
1627 **Identified by Different Publications**

1628 Similar to what we observed during our validation analyses using data from purified cell types,  
1629 we found that the predicted cell content for our post-mortem human cortical samples (“cell type indices”)  
1630 was similar regardless of the methodology used to generate the cell type specific gene lists used in the  
1631 predictions. Within all four of the cortical microarray datasets, there was a strong positive correlation  
1632 between cell type indices representing the same cell type, even when the predictions were derived using  
1633 cell type specific gene lists from different species, cell type purification strategies, and platforms. In

## Running Head: PREDICTING CELL TYPE BALANCE

1634 general, we found that the pattern of correlations between the 38 cell type indices clearly clustered within  
1635 three large umbrella categories: neurons, oligodendrocytes, and support cells (astrocytes, microglia, and  
1636 neurovasculature). This clustering was clear using visual inspection of the correlation matrices (**Suppl.**  
1637 **Figure 11, Suppl. Figure 12**), hierarchical clustering, or consensus clustering (**Suppl. Figure 13**;  
1638 ConsensusClusterPlus: (43)) and persisted even after removing data from genes identified as cell type  
1639 specific in multiple publications (e.g., gene expression identified as astrocyte-expression in both  
1640 Cahoy\_Astrocyte and Zhang\_Astrocyte; **Suppl. Figure 14, Suppl. Figure 16**). In some datasets, the cell  
1641 type indices for support cell subcategories were also clearly clustered (**Suppl. Figure 11**). In contrast,  
1642 clustering was not able to reliably discern neuronal subcategories (interneurons, projection neurons) in  
1643 any dataset. Likewise, oligodendrocyte progenitor cell indices derived from different publications did not  
1644 strongly correlate with each other, perhaps indicating a lack of significant presence of progenitor cells in  
1645 the cortex of the primarily middle-aged subjects.

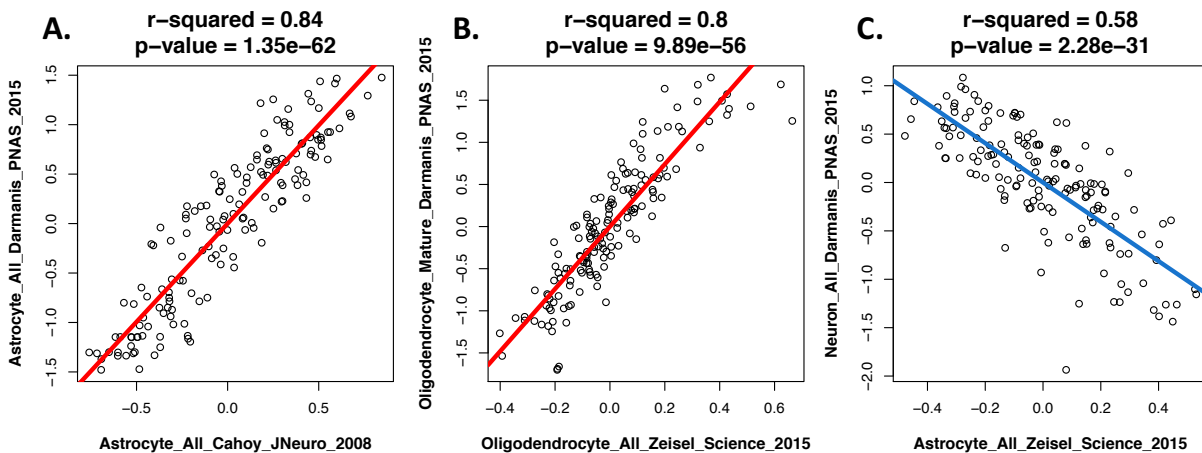





# Running Head: PREDICTING CELL TYPE BALANCE

|                                | Astrocyte_AI_Cahoy_Neuro_2008 | Astrocyte_AI_Darmanis_PNAS_2015 | Astrocyte_AI_Doye_Cell_2008 | Astrocyte_AI_Zeisel_Science_2015 | Astrocyte_AI_Zhang_Neuro_2014 | Microglia_AI_Darmanis_PNAS_2015 | Microglia_AI_Zeisel_Science_2015 | Microglia_AI_Zhang_Neuro_2014 | Endothelial_AI_Darmanis_PNAS_2015 | Endothelial_AI_Zeisel_Science_2015 | Mural_Pericyte_Zhang_Neuro_2014 | Mural_Vascular_Daneman_PLOS_2010 | Neuron_AI_Cahoy_Neuro_2008 | Neuron_AI_Darmanis_PNAS_2015 | Neuron_AI_Doye_Cell_2008 | Neuron_AI_Zhang_Neuro_2014 | Neuron_Corticospinal_Doye_Cell_2008 | Neuron_Corticospinal_Zhang_Neuro_2014 | Neuron_GABA_Sugino_NatNeuro_2006 | Neuron_Interneuron_CORT_Doye_Cell_2008 | Neuron_Interneuron_Zeisel_Science_2015 | Neuron_Neuron_CCK_Doye_Cell_2008 | Oligodendrocyte_AI_Cahoy_Neuro_2008 | Oligodendrocyte_AI_Zeisel_Science_2015 | Oligodendrocyte_Mature_Darmanis_PNAS_2015 | Oligodendrocyte_Mature_Doye_Cell_2008 | Oligodendrocyte_Myelinating_Zhang_Neuro_2014 | Oligodendrocyte_Newly-Formed_Zhang_Neuro_2014 | Oligodendrocyte_Progenitor_Cell_Darmanis_PNAS_2015 | Oligodendrocyte_Progenitor_Cell_Zhang_Neuro_2014 | RBC_AI_GeneCardSearch_Hemoglobin_ErythrocyteSpecific |
|--------------------------------|-------------------------------|---------------------------------|-----------------------------|----------------------------------|-------------------------------|---------------------------------|----------------------------------|-------------------------------|-----------------------------------|------------------------------------|---------------------------------|----------------------------------|----------------------------|------------------------------|--------------------------|----------------------------|-------------------------------------|---------------------------------------|----------------------------------|----------------------------------------|----------------------------------------|----------------------------------|-------------------------------------|----------------------------------------|-------------------------------------------|---------------------------------------|----------------------------------------------|-----------------------------------------------|----------------------------------------------------|--------------------------------------------------|------------------------------------------------------|
| <b>Astrocytes</b>              | 1.0                           | 0.9                             | 0.9                         | 1.0                              | 0.8                           | 0.8                             | 0.7                              | 0.7                           | 0.8                               | 0.8                                | 0.8                             | 0.8                              | 0.8                        | 0.8                          | 0.8                      | 0.8                        | 0.8                                 | 0.8                                   | 0.8                              | 0.8                                    | 0.8                                    | 0.8                              | 0.8                                 | 0.8                                    | 0.8                                       | 0.8                                   | 0.8                                          | 0.8                                           | 0.8                                                | 0.8                                              |                                                      |
| <b>Microglia</b>               | 0.8                           | 0.7                             | 0.7                         | 0.7                              | 1.0                           | 1.0                             | 1.0                              | 1.0                           | 0.8                               | 0.8                                | 0.8                             | 0.8                              | 0.8                        | 0.8                          | 0.8                      | 0.8                        | 0.8                                 | 0.8                                   | 0.8                              | 0.8                                    | 0.8                                    | 0.8                              | 0.8                                 | 0.8                                    | 0.8                                       | 0.8                                   | 0.8                                          | 0.8                                           | 0.8                                                | 0.8                                              |                                                      |
| <b>Endothelial &amp; Mural</b> | 0.8                           | 0.8                             | 0.8                         | 0.8                              | 0.8                           | 0.8                             | 0.8                              | 0.8                           | 1.0                               | 1.0                                | 1.0                             | 1.0                              | 0.8                        | 0.8                          | 0.8                      | 0.8                        | 0.8                                 | 0.8                                   | 0.8                              | 0.8                                    | 0.8                                    | 0.8                              | 0.8                                 | 0.8                                    | 0.8                                       | 0.8                                   | 0.8                                          | 0.8                                           | 0.8                                                | 0.8                                              |                                                      |
| <b>Neurons</b>                 | 0.8                           | 0.8                             | 0.8                         | 0.8                              | 0.8                           | 0.8                             | 0.8                              | 0.8                           | 0.8                               | 0.8                                | 0.8                             | 0.8                              | 0.8                        | 0.8                          | 0.8                      | 0.8                        | 0.8                                 | 0.8                                   | 0.8                              | 0.8                                    | 0.8                                    | 0.8                              | 0.8                                 | 0.8                                    | 0.8                                       | 0.8                                   | 0.8                                          | 0.8                                           | 0.8                                                | 0.8                                              |                                                      |
| <b>Mature Oligodendrocytes</b> | 0.8                           | 0.8                             | 0.8                         | 0.8                              | 0.8                           | 0.8                             | 0.8                              | 0.8                           | 0.8                               | 0.8                                | 0.8                             | 0.8                              | 0.8                        | 0.8                          | 0.8                      | 0.8                        | 0.8                                 | 0.8                                   | 0.8                              | 0.8                                    | 0.8                                    | 0.8                              | 0.8                                 | 0.8                                    | 0.8                                       | 0.8                                   | 0.8                                          | 0.8                                           | 0.8                                                | 0.8                                              |                                                      |

G.

|                                | Astrocyte_AI_Cahoy_Neuro_2008 | Astrocyte_AI_Darmanis_PNAS_2015 | Astrocyte_AI_Doye_Cell_2008 | Astrocyte_AI_Zeisel_Science_2015 | Astrocyte_AI_Zhang_Neuro_2014 | Microglia_AI_Darmanis_PNAS_2015 | Microglia_AI_Zeisel_Science_2015 | Microglia_AI_Zhang_Neuro_2014 | Endothelial_AI_Darmanis_PNAS_2015 | Endothelial_AI_Zeisel_Science_2015 | Mural_Pericyte_Zhang_Neuro_2014 | Mural_Vascular_Daneman_PLOS_2010 | Neuron_AI_Cahoy_Neuro_2008 | Neuron_AI_Darmanis_PNAS_2015 | Neuron_AI_Doye_Cell_2008 | Neuron_AI_Zhang_Neuro_2014 | Neuron_Corticospinal_Doye_Cell_2008 | Neuron_Corticospinal_Zhang_Neuro_2014 | Neuron_GABA_Sugino_NatNeuro_2006 | Neuron_Interneuron_CORT_Doye_Cell_2008 | Neuron_Interneuron_Zeisel_Science_2015 | Neuron_Neuron_CCK_Doye_Cell_2008 | Oligodendrocyte_AI_Cahoy_Neuro_2008 | Oligodendrocyte_AI_Zeisel_Science_2015 | Oligodendrocyte_Mature_Darmanis_PNAS_2015 | Oligodendrocyte_Mature_Doye_Cell_2008 | Oligodendrocyte_Myelinating_Zhang_Neuro_2014 | Oligodendrocyte_Newly-Formed_Zhang_Neuro_2014 | Oligodendrocyte_Progenitor_Cell_Darmanis_PNAS_2015 | Oligodendrocyte_Progenitor_Cell_Zhang_Neuro_2014 | RBC_AI_GeneCardSearch_Hemoglobin_ErythrocyteSpecific |       |       |       |       |       |       |       |
|--------------------------------|-------------------------------|---------------------------------|-----------------------------|----------------------------------|-------------------------------|---------------------------------|----------------------------------|-------------------------------|-----------------------------------|------------------------------------|---------------------------------|----------------------------------|----------------------------|------------------------------|--------------------------|----------------------------|-------------------------------------|---------------------------------------|----------------------------------|----------------------------------------|----------------------------------------|----------------------------------|-------------------------------------|----------------------------------------|-------------------------------------------|---------------------------------------|----------------------------------------------|-----------------------------------------------|----------------------------------------------------|--------------------------------------------------|------------------------------------------------------|-------|-------|-------|-------|-------|-------|-------|
| <b>Astrocytes</b>              | 1.0                           | 0.925                           | 0.886                       | 0.800                            | 0.363                         | 0.663                           | 0.586                            | 0.624                         | 0.622                             | 0.702                              | 0.677                           | 0.653                            | 0.479                      | 0.616                        | 0.61                     | 0.69                       | 0.45                                | 0.17                                  | 0.09                             | 0.444                                  | 0.47                                   | 0.64                             | 0.56                                | 0.24                                   | 0.44                                      | 0.11                                  | 0.264                                        | 0.191                                         | 0.127                                              | 0.14                                             | 0.11                                                 | 0.246 | 0.256 | 0.58  | 0.796 | 0.42  | 0.24  |       |
| <b>Microglia</b>               | 0.886                         | 0.798                           | 0.826                       | 1.0                              | 0.729                         | 0.886                           | 0.886                            | 0.886                         | 0.886                             | 0.886                              | 0.886                           | 0.886                            | 0.886                      | 0.886                        | 0.886                    | 0.886                      | 0.886                               | 0.886                                 | 0.886                            | 0.886                                  | 0.886                                  | 0.886                            | 0.886                               | 0.886                                  | 0.886                                     | 0.886                                 | 0.886                                        | 0.886                                         | 0.886                                              | 0.886                                            | 0.886                                                | 0.886 | 0.886 | 0.886 | 0.886 | 0.886 | 0.886 |       |
| <b>Endothelial &amp; Mural</b> | 0.886                         | 0.886                           | 0.886                       | 0.886                            | 0.886                         | 0.886                           | 0.886                            | 0.886                         | 1.0                               | 1.0                                | 1.0                             | 1.0                              | 0.886                      | 0.886                        | 0.886                    | 0.886                      | 0.886                               | 0.886                                 | 0.886                            | 0.886                                  | 0.886                                  | 0.886                            | 0.886                               | 0.886                                  | 0.886                                     | 0.886                                 | 0.886                                        | 0.886                                         | 0.886                                              | 0.886                                            | 0.886                                                | 0.886 | 0.886 | 0.886 | 0.886 | 0.886 | 0.886 | 0.886 |
| <b>Neurons</b>                 | 0.886                         | 0.886                           | 0.886                       | 0.886                            | 0.886                         | 0.886                           | 0.886                            | 0.886                         | 0.886                             | 0.886                              | 0.886                           | 0.886                            | 0.886                      | 0.886                        | 0.886                    | 0.886                      | 0.886                               | 0.886                                 | 0.886                            | 0.886                                  | 0.886                                  | 0.886                            | 0.886                               | 0.886                                  | 0.886                                     | 0.886                                 | 0.886                                        | 0.886                                         | 0.886                                              | 0.886                                            | 0.886                                                | 0.886 | 0.886 | 0.886 | 0.886 | 0.886 | 0.886 |       |
| <b>Mature Oligodendrocytes</b> | 0.886                         | 0.886                           | 0.886                       | 0.886                            | 0.886                         | 0.886                           | 0.886                            | 0.886                         | 0.886                             | 0.886                              | 0.886                           | 0.886                            | 0.886                      | 0.886                        | 0.886                    | 0.886                      | 0.886                               | 0.886                                 | 0.886                            | 0.886                                  | 0.886                                  | 0.886                            | 0.886                               | 0.886                                  | 0.886                                     | 0.886                                 | 0.886                                        | 0.886                                         | 0.886                                              | 0.886                                            | 0.886                                                | 0.886 | 0.886 | 0.886 | 0.886 | 0.886 | 0.886 |       |



1646 H.

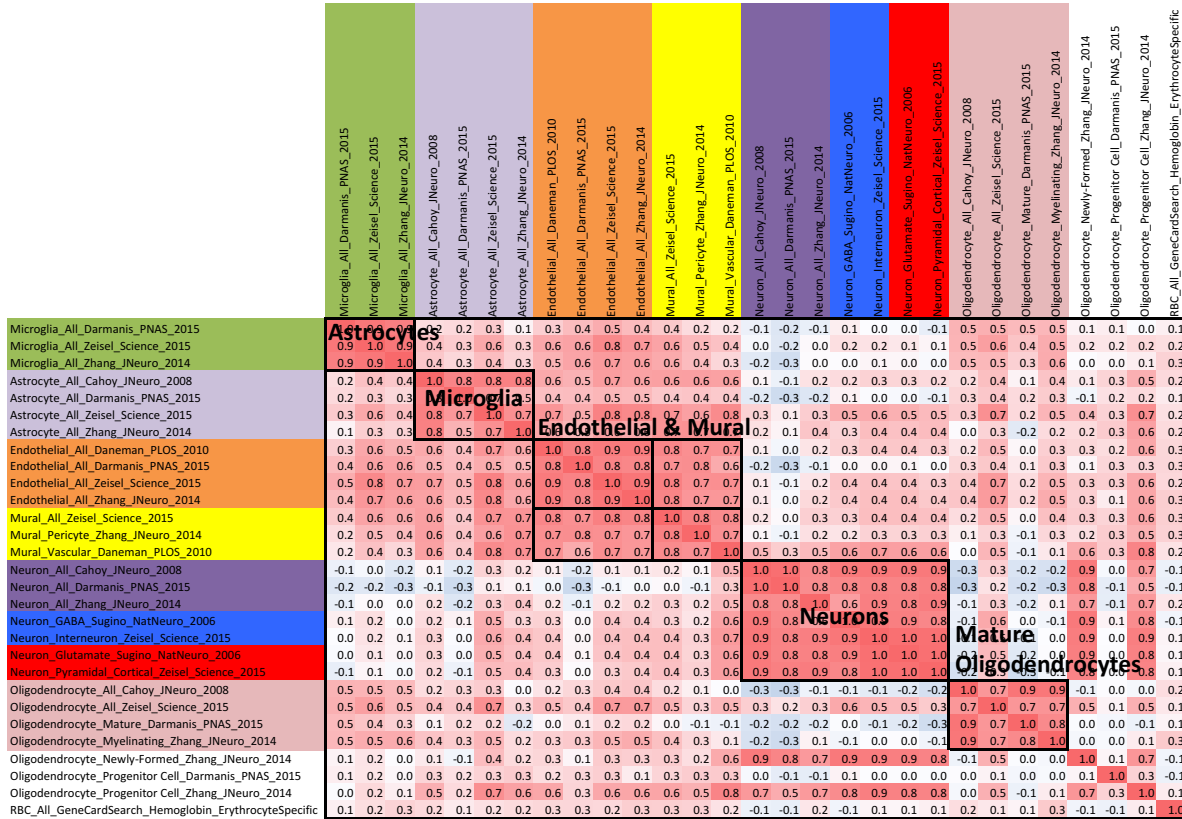

1647

1648 **Suppl. Figure 11. There is a convergence of cell content predictions derived from cell type specific**  
 1649 **transcripts identified by different publications. A-B.** Predictions of the relative cell content of our  
 1650 human cortical samples (“cell type indices”) for any particular cell type were strongly correlated, even  
 1651 when the predictions were based on cell type specific transcripts identified by experiments using very  
 1652 different methodology. The examples given above include predictions based on cell type specific  
 1653 transcripts originally identified in mouse (x-axis) vs. human (y-axis) tissue. **C.** In contrast, there was a  
 1654 strong negative correlation between the predictions for dissimilar cell types, such as neurons and  
 1655 astrocytes. **D.** The similarity of different cell type indices in the Pritzker cortical dataset can be visualized  
 1656 using a correlation matrix. Within this matrix, correlations can range from a strong negative correlation  
 1657 of -1 (blue) to a strong positive correlation of 1 (red), therefore a large block of pink/red correlations is  
 1658 indicative of cell type indices that tend to be enriched in the same samples. The axis labels for cell type  
 1659 indices representing the same category of cell are color-coded: general neuronal categories are dark  
 1660 purple, pyramidal neurons are red, inhibitory interneurons are dark blue, astrocytes are light purple,  
 1661 endothelial cells are orange, mural cells are yellow, microglia are green, mature oligodendrocytes are  
 1662 pink, and the remaining indices remain white to represent lack of coherent categorization. The number of  
 1663 probes included in each index is present in the far left column (also color-coded, with green indicating  
 1664 few probes and red indicating many probes). **E-H.** The cell type index correlation matrices for the  
 1665 replication cortical datasets: **E.** Narayan et al. (GSE21138), **F.** Lanz et al. (GSE53987), **G.** Barnes et al.  
 1666 (GSE21935) **H.** CMC RNA-Seq

1667

### Running Head: PREDICTING CELL TYPE BALANCE

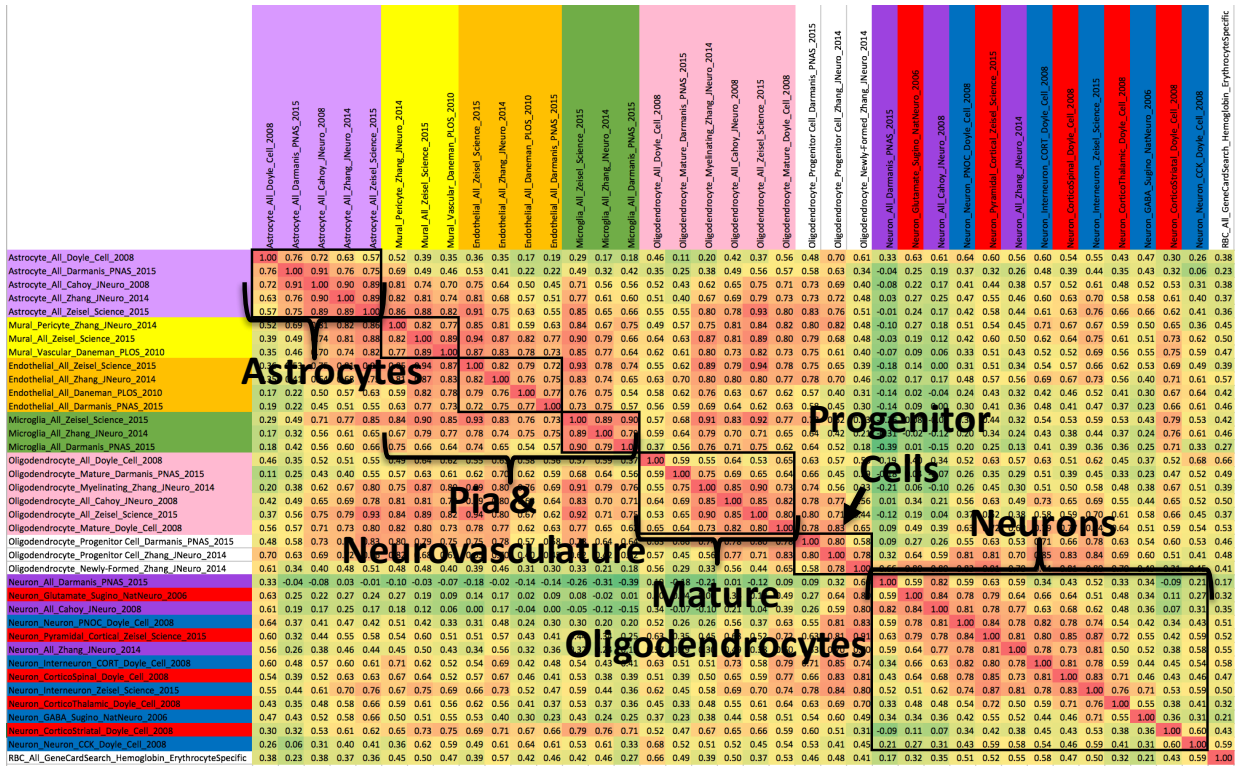

1668

1669 **Suppl. Figure 12. The convergence of cell content predictions derived from cell type specific transcripts**  
 1670 **within the Allen Brain Atlas dataset. Within the Allen Brain Atlas dataset, the main source of variation**  
 1671 **within the data (PC1) was negatively related to all cell types, with an especially strong relationship with**  
 1672 **mural cells ( $R^2=0.847$ ), oligodendrocytes ( $R^2=0.808$ ), and endothelial cells ( $R^2=0.775$ ), suggesting that**  
 1673 **perhaps the main source of variation in the dataset (PC1) represented general tissue cell density instead**  
 1674 **of cell type balance per se. This causes the cell type indices for almost all cell types to be positively**  
 1675 **correlated (see below), and therefore this correlation matrix has a slightly different format than Suppl.**  
 1676 **Figure 11 and Suppl. Figure 16. The cell types are still coded as in the previous figures, but the**  
 1677 **correlation coefficients (R) in the matrix are no longer color coded with blue indicating a negative**  
 1678 **correlation and red indicating a positive correlation. Instead, the green to red gradient indicates**  
 1679 **increasing percentile from most negative to most positive. The tightest correlations are red, with two**  
 1680 **obvious clusters: one cluster representing neurons and another representing glia and support cells. This**  
 1681 **differs from the Pritzker dorsolateral prefrontal cortex data, in which oligodendrocytes were found in**  
 1682 **their own cluster, perhaps due to a greater variation in the agonal conditions of the subjects (providing**  
 1683 **an impetus for the correlated upregulation of astrocytes and neurovasculature) or perhaps due to the**  
 1684 **spatial segregation of these cell types within the layered cortex (with an enrichment of vasculature and**  
 1685 **astrocytes at the surface of the cortex and an enrichment of white matter under the cortex). Also notable**  
 1686 **is the more coherent signature for progenitor cells within the Allen Brain Atlas dataset, perhaps due to**  
 1687 **the inclusion of tissue from neurogenic regions.**

1688

1689

1690

1691

Running Head: PREDICTING CELL TYPE BALANCE

|                                                       | k=3 | k=4 | k=6 | k=9 |
|-------------------------------------------------------|-----|-----|-----|-----|
| Astrocyte_All_Cahoy_JNeuro_2008                       | 1   | 1   | 1   | 1   |
| Astrocyte_All_Darmanis_PNAS_2015                      | 1   | 2   | 2   | 2   |
| Astrocyte_All_Doyle_Cell_2008                         | 1   | 2   | 2   | 2   |
| Astrocyte_All_Zeisel_Science_2015                     | 1   | 1   | 1   | 1   |
| Astrocyte_All_Zhang_JNeuro_2014                       | 1   | 1   | 1   | 1   |
| Endothelial_All_Daneman_PLOS_2010                     | 1   | 1   | 1   | 1   |
| Endothelial_All_Darmanis_PNAS_2015                    | 1   | 1   | 1   | 1   |
| Endothelial_All_Zeisel_Science_2015                   | 1   | 1   | 1   | 1   |
| Endothelial_All_Zhang_JNeuro_2014                     | 1   | 1   | 1   | 1   |
| Microglia_All_Darmanis_PNAS_2015                      | 1   | 1   | 3   | 3   |
| Microglia_All_Zeisel_Science_2015                     | 1   | 1   | 1   | 1   |
| Microglia_All_Zhang_JNeuro_2014                       | 1   | 1   | 1   | 1   |
| Mural_All_Zeisel_Science_2015                         | 1   | 1   | 1   | 1   |
| Mural_Pericyte_Zhang_JNeuro_2014                      | 1   | 1   | 1   | 1   |
| Mural_Vascular_Daneman_PLOS_2010                      | 2   | 1   | 1   | 1   |
| Neuron_All_Cahoy_JNeuro_2008                          | 2   | 3   | 4   | 4   |
| Neuron_All_Darmanis_PNAS_2015                         | 2   | 3   | 4   | 4   |
| Neuron_All_Zhang_JNeuro_2014                          | 2   | 3   | 4   | 5   |
| Neuron_CorticoSpinal_Doyle_Cell_2008                  | 2   | 3   | 4   | 5   |
| Neuron_CorticoStriatum_Doyle_Cell_2008                | 1   | 1   | 3   | 3   |
| Neuron_CorticoThalamic_Doyle_Cell_2008                | 2   | 3   | 5   | 6   |
| Neuron_GABA_Sugino_NatNeuro_2006                      | 2   | 3   | 4   | 5   |
| Neuron_Glutamate_Sugino_NatNeuro_2006                 | 2   | 3   | 4   | 5   |
| Neuron_Interneuron_CORT_Doyle_Cell_2008               | 2   | 3   | 4   | 7   |
| Neuron_Interneuron_Zeisel_Science_2015                | 2   | 3   | 4   | 5   |
| Neuron_Neuron_CCK_Doyle_Cell_2008                     | 2   | 3   | 4   | 7   |
| Neuron_Neuron_PNOC_Doyle_Cell_2008                    | 2   | 3   | 4   | 7   |
| Neuron_Pyramidal_Cortical_Zeisel_Science_2015         | 2   | 3   | 4   | 5   |
| Oligodendrocyte_All_Cahoy_JNeuro_2008                 | 3   | 4   | 6   | 8   |
| Oligodendrocyte_All_Doyle_Cell_2008                   | 2   | 3   | 5   | 5   |
| Oligodendrocyte_All_Zeisel_Science_2015               | 3   | 4   | 6   | 8   |
| Oligodendrocyte_Mature_Darmanis_PNAS_2015             | 3   | 4   | 6   | 8   |
| Oligodendrocyte_Mature_Doyle_Cell_2008                | 3   | 4   | 6   | 8   |
| Oligodendrocyte_Myelinating_Zhang_JNeuro_2014         | 3   | 4   | 6   | 8   |
| Oligodendrocyte_Newly-Formed_Zhang_JNeuro_2014        | 2   | 3   | 4   | 5   |
| Oligodendrocyte_Progenitor Cell_Darmanis_PNAS_2015    | 1   | 1   | 1   | 6   |
| Oligodendrocyte_Progenitor Cell_Zhang_JNeuro_2014     | 2   | 3   | 5   | 6   |
| RBC All GeneCardSearch Hemoglobin ErythrocyteSpecific | 2   | 1   | 5   | 9   |

1692

1693 **Suppl. Figure 13. Consensus clustering indicates the cell type indices clearly cluster into three large**  
 1694 **umbrella categories: neurons, oligodendrocytes, and support cells.** The cell type indices were developed  
 1695 using cell type specific genes identified by different publications, species, and methodologies, and are  
 1696 categorically color-coded in a manner similar to **Suppl. Figure 11**. Each column represents the  
 1697 numerical category (cluster) assigned to a cell type index in a k-means clustering algorithm with k  
 1698 number of clusters – for example, in the column “k=3”, the algorithm sorted each of the cell type indices  
 1699 into 3 clusters based on similarity (defined by Euclidean distance). These 3 clusters are easily identifiable  
 1700 as neurons, oligodendrocytes, and support cells. Increasing the number of clusters (k) did not improve the  
 1701 ability of the algorithm to detect more specific neuronal subcategories (interneurons, projection neurons)  
 1702 or support cell subcategories (astrocytes, endothelial cells, mural cells, microglia), and the immature  
 1703 oligodendrocyte indices from different publications showed a notable lack of convergence. The consensus  
 1704 clustering was run using 50 bootstraps with a proportion of 0.8 item subsampling and 1.0 feature  
 1705 subsampling.

1706

1707





Running Head: PREDICTING CELL TYPE BALANCE

| Cell Type Index:                                   | # of Probes (before overlap removal) | # of Probes (after overlap removal) | % remaining: |
|----------------------------------------------------|--------------------------------------|-------------------------------------|--------------|
| Astrocyte_All_Cahoy_JNeuro_2008                    | 43                                   | 15                                  | 0.35         |
| Astrocyte_All_Darmanis_PNAS_2015                   | 13                                   | 7                                   | 0.54         |
| Astrocyte_All_Doyle_Cell_2008                      | 11                                   | 3                                   | 0.27         |
| Astrocyte_All_Zeisel_Science_2015                  | 145                                  | 112                                 | 0.77         |
| Astrocyte_All_Zhang_JNeuro_2014                    | 31                                   | 11                                  | 0.35         |
| Endothelial_All_Daneman_PLOS_2010                  | 23                                   | 4                                   | 0.17         |
| Endothelial_All_Darmanis_PNAS_2015                 | 18                                   | 15                                  | 0.83         |
| Endothelial_All_Zeisel_Science_2015                | 237                                  | 183                                 | 0.77         |
| Endothelial_All_Zhang_JNeuro_2014                  | 35                                   | 7                                   | 0.20         |
| Microglia_All_Darmanis_PNAS_2015                   | 19                                   | 9                                   | 0.47         |
| Microglia_All_Zeisel_Science_2015                  | 291                                  | 224                                 | 0.77         |
| Microglia_All_Zhang_JNeuro_2014                    | 24                                   | 5                                   | 0.21         |
| Mural_All_Zeisel_Science_2015                      | 92                                   | 78                                  | 0.85         |
| Mural_Pericyte_Zhang_JNeuro_2014                   | 32                                   | 18                                  | 0.56         |
| Mural_Vascular_Daneman_PLOS_2010                   | 34                                   | 15                                  | 0.44         |
| Neuron_All_Cahoy_JNeuro_2008                       | 52                                   | 24                                  | 0.46         |
| Neuron_All_Darmanis_PNAS_2015                      | 15                                   | 8                                   | 0.53         |
| Neuron_All_Zhang_JNeuro_2014                       | 23                                   | 13                                  | 0.57         |
| Neuron_CorticoSpinal_Doyle_Cell_2008               | 18                                   | 4                                   | 0.22         |
| Neuron_CorticoStriatal_Doyle_Cell_2008             | 12                                   | 0                                   | 0.00         |
| Neuron_CorticoThalamic_Doyle_Cell_2008             | 14                                   | 6                                   | 0.43         |
| Neuron_GABA_Sugino_NatNeuro_2006                   | 19                                   | 9                                   | 0.47         |
| Neuron_Glutamate_Sugino_NatNeuro_2006              | 42                                   | 33                                  | 0.79         |
| Neuron_Interneuron_CORT_Doyle_Cell_2008            | 14                                   | 6                                   | 0.43         |
| Neuron_Interneuron_Zeisel_Science_2015             | 199                                  | 163                                 | 0.82         |
| Neuron_Neuron_CCK_Doyle_Cell_2008                  | 10                                   | 2                                   | 0.20         |
| Neuron_Neuron_PNOC_Doyle_Cell_2008                 | 18                                   | 5                                   | 0.28         |
| Neuron_Pyramidal_Cortical_Zeisel_Science_2015      | 154                                  | 121                                 | 0.79         |
| Oligodendrocyte_All_Cahoy_JNeuro_2008              | 29                                   | 7                                   | 0.24         |
| Oligodendrocyte_All_Doyle_Cell_2008                | 18                                   | 11                                  | 0.61         |
| Oligodendrocyte_All_Zeisel_Science_2015            | 255                                  | 204                                 | 0.80         |
| Oligodendrocyte_Mature_Darmanis_PNAS_2015          | 15                                   | 9                                   | 0.60         |
| Oligodendrocyte_Mature_Doyle_Cell_2008             | 14                                   | 3                                   | 0.21         |
| Oligodendrocyte_Myelinating_Zhang_JNeuro_2014      | 28                                   | 11                                  | 0.39         |
| Oligodendrocyte_Newly-Formed_Zhang_JNeuro_2014     | 24                                   | 15                                  | 0.63         |
| Oligodendrocyte_Progenitor_Cell_Darmanis_PNAS_2015 | 15                                   | 10                                  | 0.67         |

1722

1723 **Suppl. Figure 15. Removing probes that represent genes identified as having cell type specific**  
 1724 **expression in multiple publications (preparation for the analysis in Suppl. Figure 16).** A summary of  
 1725 the full number of probes included in each cell type index before and after removal of the probes that  
 1726 overlapped with any other index (color-labeled with pink representing a large number of probes and blue  
 1727 representing fewer probes). The percentage of probes retained in the index after full overlap removal is  
 1728 also provided, with green indicating a small percentage of probes retained, and red indicating a large  
 1729 percentage.

Running Head: PREDICTING CELL TYPE BALANCE

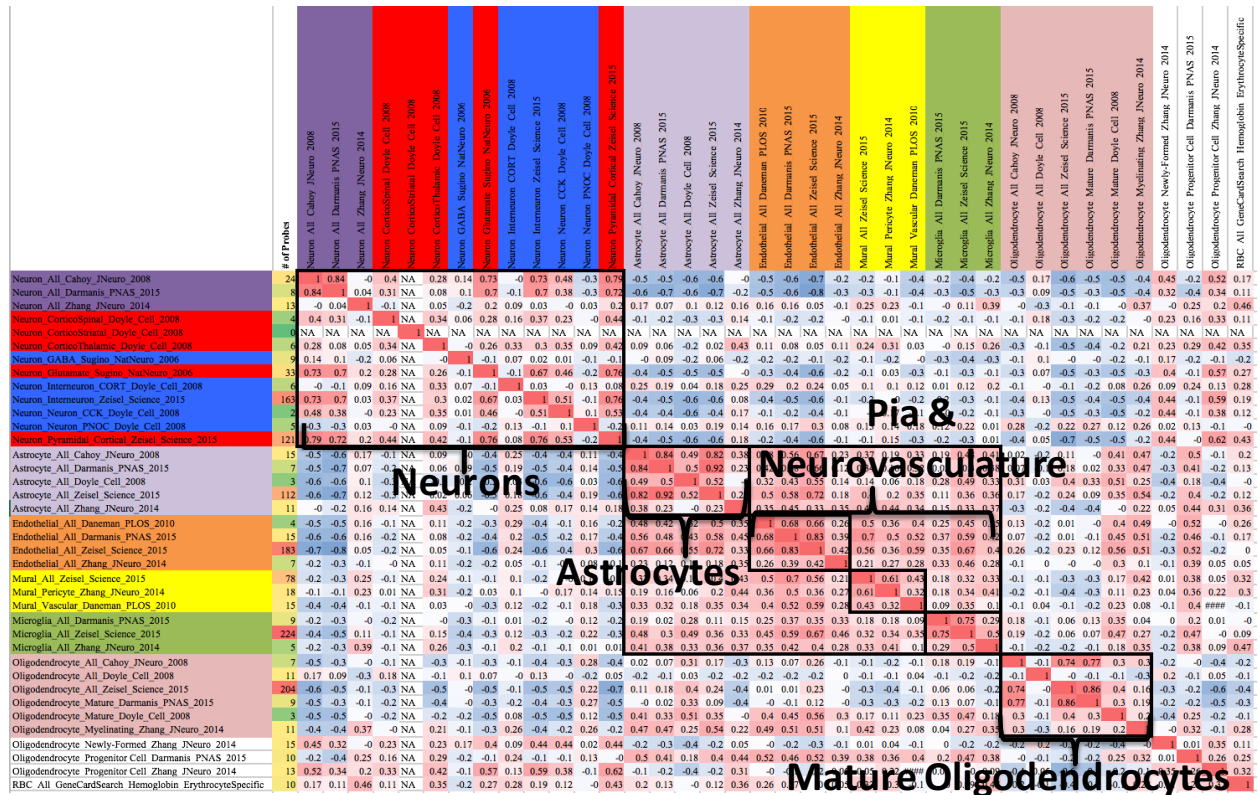

Running Head: PREDICTING CELL TYPE BALANCE

1742

|                          | Freq | Astrocyte | Endothelial | Microglia | Mural | Neuron_<br>All | Neuron_<br>Interneuron | Neuron_<br>Projection | Oligodendrocyte | Oligodendrocyte<br>_Immature | RBC  |
|--------------------------|------|-----------|-------------|-----------|-------|----------------|------------------------|-----------------------|-----------------|------------------------------|------|
| Astrocyte                | 243  | 100%      | 1%          | 2%        | 5%    | 0%             | 2%                     | 2%                    | 3%              | 2%                           | 0%   |
| Endothelial              | 313  | 1%        | 100%        | 3%        | 2%    | 1%             | 2%                     | 8%                    | 0%              | 0%                           | 0%   |
| Microglia                | 334  | 1%        | 2%          | 100%      | 1%    | 0%             | 1%                     | 4%                    | 2%              | 0%                           | 0%   |
| Mural                    | 158  | 8%        | 2%          | 3%        | 100%  | 1%             | 1%                     | 7%                    | 3%              | 5%                           | 0%   |
| Neuron_All               | 90   | 1%        | 2%          | 1%        | 1%    | 100%           | 13%                    | 13%                   | 2%              | 1%                           | 0%   |
| Neuron_Interneuron       | 260  | 1%        | 2%          | 1%        | 1%    | 5%             | 100%                   | 3%                    | 1%              | 0%                           | 0%   |
| Neuron_Projection        | 240  | 2%        | 6%          | 5%        | 3%    | 7%             | 3%                     | 100%                  | 2%              | 2%                           | 0%   |
| Oligodendrocyte          | 359  | 2%        | 0%          | 2%        | 1%    | 1%             | 1%                     | 1%                    | 100%            | 3%                           | 0%   |
| Oligodendrocyte_Immature | 58   | 7%        | 2%          | 0%        | 9%    | 2%             | 2%                     | 9%                    | 16%             | 100%                         | 0%   |
| RBC                      | 11   | 0%        | 9%          | 0%        | 0%    | 0%             | 0%                     | 0%                    | 0%              | 0%                           | 100% |

1743

1744 *Suppl. Figure 17. For later analyses, individual cell type indices were averaged by primary category,*  
 1745 *with any transcripts that overlapped between categories removed. The percent overlap between*  
 1746 *transcripts defined as specific to different categories of cell type is illustrated below, color-coded with a*  
 1747 *gradient from blue (indicating 0% overlap) to red (indicating 100% overlap). The denominator in the*  
 1748 *percentage overlap equation was defined as the cell type category specified by the row. The column on*  
 1749 *the far left provides the number of probes included in each cell type category.*

1750

1751

1752

1753 **7.5 Additional figures and results: Cell Type Indices Predict Other Genes Known to Be Cell Type**

1754 **Enriched**

1755 To identify other transcripts important to cell type specific functions in the human cortex, we ran  
 1756 a linear model on the signal from each gene probeset in the Pritzker prefrontal cortex microarray dataset  
 1757 that included each of the ten consolidated primary cell type indices as well as six co-variables traditionally  
 1758 included in the analysis of human brain gene expression data (pH, Agonal Factor, PMI, Age, Gender,  
 1759 Diagnosis; **Equation 5**). On average, this model explained 35% of the variation in the data ( $R^2$ ). Shown in  
 1760 **Suppl. Figure 18** are the most significant 10 gene probe sets positively associated with each cell type  
 1761 while controlling for the other cell types and co-variables within the model. Additional gene probe sets and  
 1762 statistical details can be found in **Suppl. Table 15**.

1763

Running Head: PREDICTING CELL TYPE BALANCE

| Astrocyte | Endothelial | Microglia | Mural   | Neuron_All | Neuron_Projection | Neuron_Interneuron | Mature Oligodendrocyte | Red Blood Cell (RBC) |
|-----------|-------------|-----------|---------|------------|-------------------|--------------------|------------------------|----------------------|
| NOTCH2    | HLA-E       | AIF1      | TAGLN   | VSNL1      | PDE2A             | TAC3               | KLK6                   | HBD                  |
| SDC2      | EPAS1       | LAPTM5    | MYL9    | SYT1       | USF2              | SLC24A3            | UGT8                   | HBB                  |
| NTRK2     | CLCN7       | IRF8      | MYH11   | SYNGR3     | DGKZ              | GAD1               | MAG                    | PKLR                 |
| CLDN10    | CLDN5       | FCER1G    | CNN1    | NEFL       | NUAK1             | KIT                | ELOVL1                 | PGC                  |
| FGFR3     | PAK4        | PTPRC     | MGP     | NRXN1      | SLC38A7           | GAD2               | EVI2A                  | NA                   |
| APOE      | MYOF        | LAIR1     | ACTA2   | SNAP25     | BEGAIN            | ERBB4              | PLLP                   | DKK4                 |
| EZR       | ICAM2       | LY86      | TP53I11 | BCL2L1     | KIAA0182          | LHX6               | MOG                    | LIPE                 |
| SLC1A3    | ABCB1       | FPR1      | COL18A1 | MAPK1      | KIF21B            | SLC6A1             | ASPA                   | SPDEF                |
| CST3      | GPR116      | C3        | TPM2    | EEF1A2     | PLXNA1            | RELN               | TF                     | C19orf57             |
| MLC1      | SDPR        | ALOX5AP   | CRABP1  | MEF2C      | SLC8A2            | ARL4C              | MAL                    | NA                   |

1764

1765 *Suppl. Figure 18. The top 10 transcripts associated with each cell type index include those previously-*  
 1766 *identified as cell type enriched in the literature. Transcripts are identified by official gene symbol.*  
 1767 *Yellow labels identify transcripts included in the original cell type index, orange transcripts were*  
 1768 *previously-identified as cell type enriched in the literature but were not included in the original list of cell*  
 1769 *type specific transcripts used to create the index. Additional transcripts and statistical details can be*  
 1770 *found in Suppl. Table 15. Please note that not all of the genes listed in the top ten list associated with the*  
 1771 *Red Blood Cell index would survive a traditional threshold for false detection threshold ( $q < 0.05$ ).*

1772 Many of the top gene probesets that we found to be related to each of the cell type indices are  
 1773 already known to be associated with that cell type in previous publications, validating our methodology.  
 1774 Importantly, this is true even when the genes were not included in the original list of cell type specific  
 1775 genes used to generate the index. For example, we found that HLA-E (Major Histocompatibility  
 1776 Complex, Class I, E) and EPAS1 (endothelial PAS domain protein 1) were both strongly associated with  
 1777 our endothelial index, and both are known to be involved in endothelial cell activation (HLA-E, in  
 1778 response to immune challenge: (95); EPAS1, in response to lack of oxygen: (96)). NOTCH2 (Notch 2),  
 1779 one of the top astrocyte-related genes, promotes astrocytic cell lineage (97), and APOE (Apolipoprotein  
 1780 E) is primarily secreted by astrocytes in the central nervous system (98). One of the top interneuron  
 1781 genes, LHX6 (LIM Homeobox 6), is specifically enriched in parvalbumin-containing interneurons in the  
 1782 human cortex (2). Another top interneuron gene, ERBB4 (Erb-B2 Receptor Tyrosine Kinase 4), controls  
 1783 the development of GABA circuitry in the cortex (99). The top neuron-related genes include several  
 1784 genes related to synaptic function (SYT1 (Synaptotagmin I), SYNGR3 (Synaptogyrin 3), NRXN1  
 1785 (Neurexin 1); <http://www.genecards.org/>). The top projection neuron-related gene, PDE2A



## Running Head: PREDICTING CELL TYPE BALANCE

1786 (Phosphodiesterase 2A, CGMP-Stimulated), is preferentially expressed in cortical pyramidal neurons  
1787 (100), and KIF21B (Kinesin Family Member 21B) is a kinesin that has been found in the dendrites of  
1788 pyramidal neurons (101). We also rediscovered probesets representing genes that were listed as  
1789 alternative orthologs to those included in our original cell type specific gene lists (oligodendrocytes:  
1790 EVI2A vs.CTD-2370N5.3, microglia: LAIR1 vs. LAIR2, mural cells: COL18A1 vs. COL15A1, ACTA2  
1791 vs. ACTG1). Altogether, these results suggest that our cell type indices were associated with the  
1792 variability of transcripts in the cortex that represented particular cell types and could re-identify known  
1793 cell type specific markers.

1794 As a follow-up analysis, we also outputted a table of the top genes associated with each cell type  
1795 within the Allen Brain Atlas dataset (as assessed using the model in **Equation 6**). We found that the  
1796 results similarly included a mixture of well-known cell type markers and novel findings (**Suppl. Figure**  
1797 **19, Suppl. Table 6**).

1798 ***Equation 6: A model of gene expression for the Allen Brain Atlas dataset, colored to illustrate***  
1799 ***subcomponents. The base model (intercept) is presented in green, the cell type indices for the most***  
1800 ***prevalent cell types are colored red, and the remaining cell type indices are in purple.***

1801 **Gene Expression (Probeset Signal) =**  
1802  $\beta_0 + \beta_1*(\text{Astrocyte}) + \beta_2*(\text{Oligodendrocyte}) + \beta_3*(\text{Microglia}) + \beta_4*(\text{Interneuron}) + \beta_5*(\text{ProjectionNeuron})$   
1803  $+ \beta_6*(\text{Endothelial}) + \beta_7*(\text{Neuron\_All}) + \beta_8*(\text{Oligodendrocyte\_Immature}) + \beta_9*(\text{Mural}) + \beta_{10}*(\text{RBC}) + \epsilon$   
1804

1805

Running Head: PREDICTING CELL TYPE BALANCE

| Astrocyte    | Endothelial  | Microglia    | Mural        | Neuron_All    | Neuron_ Interneuron | Neuron_ Projection | Oligodendrocyte | Oligodendrocyte_ Immature | RBC          |
|--------------|--------------|--------------|--------------|---------------|---------------------|--------------------|-----------------|---------------------------|--------------|
| GJA1         | SDPR         | AIF1         | SAMD11       | SCN2A         | GAD1                | EGR4               | C11orf9         | RIMBP2                    | HBG2         |
| BMPR1B       | A_23_P136753 | RGS10        | PDLIM5       | SYT4          | GAD2                | EXOC6              | CPOX            | A_32_P176036              | HBZ          |
| PON2         | LOC390760    | LY86         | MXRA8        | SNAP25        | KLHDC5              | BAIAP2             | FRYL            | IL1RAP                    | TOP2A        |
| PPAP2B       | A_32_P234414 | TYROBP       | ABHD4        | NOL4          | CRHBP               | A_32_P136033       | SLC5A11         | LARP1                     | HOXA11-AS    |
| ARHGEF26     | CLDN19       | GPR34        | CBX5         | BEX1          | UQCRB               | SIPA1L1            | FAM125B         | CHD5                      | HBG1         |
| FGFR3        | PRND         | CYBB         | APH1B        | CRMP1         | PPP1CB              | A_24_P219094       | LAMP2           | YWHAG                     | MELK         |
| TP53BP2      | A_32_P181339 | ADAM28       | A_24_P504050 | ADD2          | KLHDC1              | FAM153A            | VWA1            | NKD2                      | PBK          |
| CLDN10       | SYNGR1       | APBB1P       | GBP3         | SYN1          | CREBL2              | A_23_P324706       | PKP4            | NRG3                      | A_23_P258666 |
| METTL7A      | CLDN2        | CD74         | STXBPA       | A_24_P896765  | TADA1               | PHYHIP             | NCKAP5          | STOML1                    | RHAG         |
| SOX9         | CDKN2A       | A_32_P223985 | DKC1         | NRXN1         | DPY19L2P3           | ITPKA              | WIPF1           | A_32_P121785              | DLGAP5       |
| GPR125       | SLC22A8      | LST1         | PTTG1P       | GAP43         | SLC32A1             | KDM5B              | A_24_P540560    | ARHGEF4                   | GAGE2C       |
| SLC7A11      | SPTBN2       | ALOX5AP      | LIMK2        | SYT1          | PJA1                | THRA               | FMNL2           | NCS1                      | A_23_P435390 |
| SLC1A3       | COL4A2       | HLA-DRA      | PTPLAD1      | SVOP          | CTAGE5              | FAM153B            | RFTN2           | CCDC92                    | A_32_P113110 |
| AGXT2L1      | LEFTY2       | FCGR1B       | RPN1         | JPH4          | DLX2                | VIPR1              | HEPACAM         | ANO5                      | PRAMEF10     |
| BBOX1        | ITIH5        | HLA-DMB      | EMILIN1      | RAB3C         | SERP1               | PDZD4              | RDX             | ODZ2                      | AHSP         |
| AQP4         | ABHD2        | CX3CR1       | HSPA5        | CELF4         | RABGEF1             | DGKZ               | C1orf198        | RANGAP1                   | CENPA        |
| MGST1        | FBLN1        | P2RY13       | A_24_P187407 | MEG3          | HDGFRP3             | SOWAHA             | BCAS1           | BAI1                      | A_23_P99653  |
| EFEMP1       | KCNJ13       | FCGR3A       | EIF2AK2      | ST8SIA3       | ATE1                | ATXN7L1            | SCD             | IDS                       | TYR          |
| PLTP         | KLK11        | FYB          | COPB2        | CUST_422_PI41 | TRIQK               | STX6               | MAP4K4          | PTPN14                    | A_23_P10525  |
| MLC1         | A_24_P290114 | PTPRC        | C22orf42     | ACTA1         | SLIRP               | ANXA11             | FGF1            | KIF21B                    | APOH         |
| NTRK2        | HPD          | BLNK         | FTO          | KIAA0319      | ZZZ3                | EFNB2              | C10orf90        | A_24_P365349              | IGJ          |
| A_32_P162494 | TMEM86B      | LAPTM5       | SPARC        | L1CAM         | SENP6               | NPTX1              | SLC48A1         | NOVA2                     | HSD17B2      |
| CYBRD1       | STEAP4       | P2RY12       | NUCB2        | GABRB3        | TATDN3              | SYNE1              | CLCA4           | SLITRK1                   | CCL20        |
| CNN3         | SULT1C2      | HPGDS        | VAT13        | CHGB          | A_24_P925241        | JPH1               | PRRG1           | CHST1                     | APOB         |
| CAMTA1       | NOS3         | RNASE6       | PDIA3        | A_32_P77831   | CNOT7               | MPP7               | MAGT1           | SHC3                      | A_24_P334208 |

1806

1807 *Suppl. Figure 19. The top 25 probes associated with each primary cell type index in the Allen Brain*  
 1808 *Atlas dataset. Depicted are the top probes identified in association with each of the primary cell types as*  
 1809 *determined by a linear model that included indices for all 10 primary cell types. This model was run*  
 1810 *using samples from all 160 brain regions. Similar to the results for the Pritzker dorsolateral prefrontal*  
 1811 *cortex data, the genes identified in the Allen Brain Atlas data as having strong relationships with*  
 1812 *particular cell types include a mixture of well-known cell type markers and more novel findings.*

1813

1814

1815 **7.6 Additional figures and results: Inferred Cell Type Composition Explains a Large Percentage of**

1816 **the Sample-Sample Variability in Microarray Data from Macro-Dissected Human Cortical**

1817 **Tissue**

1818

Running Head: PREDICTING CELL TYPE BALANCE

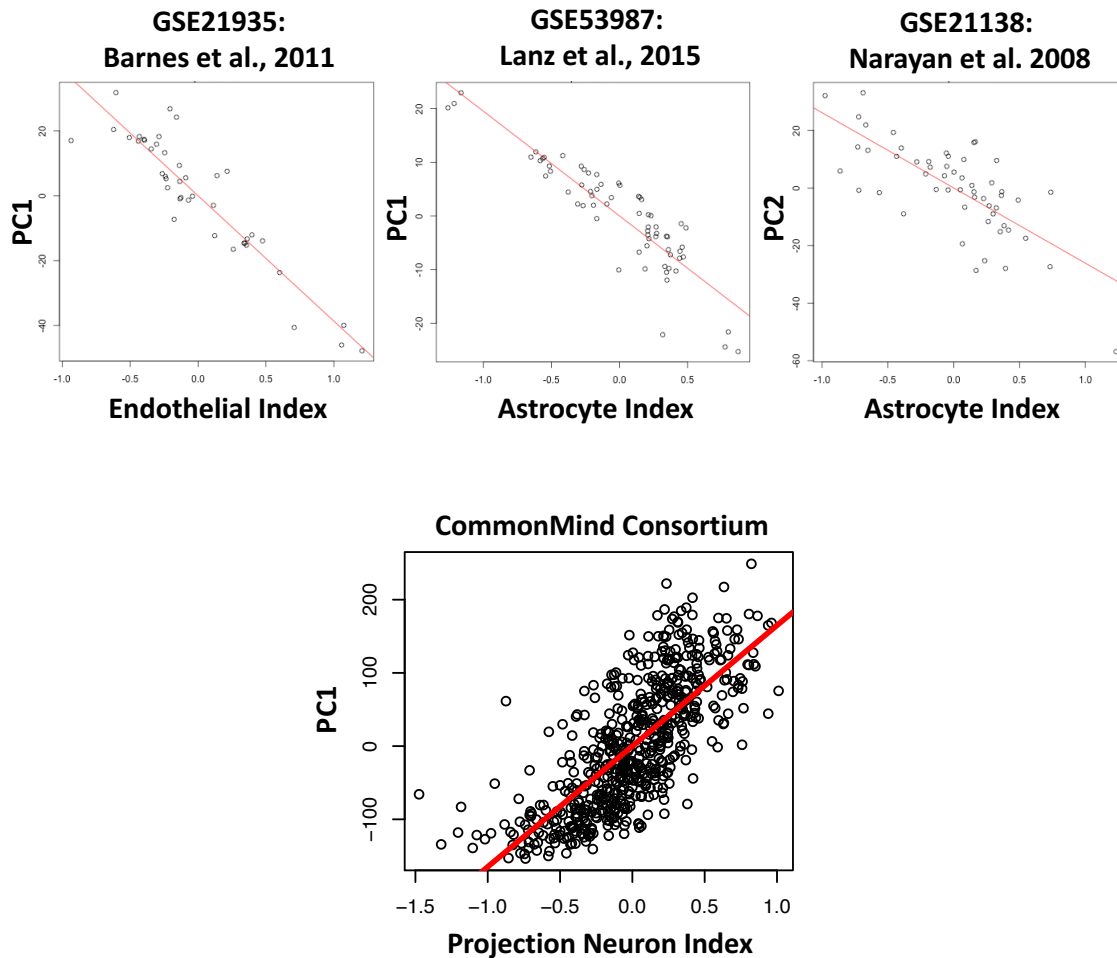

1819

1820

1821

1822 **Suppl. Figure 20. Replication: Cell content predictions explain a large percentage of the variability in**  
1823 **microarray and RNA-Seq data derived from the human cortex. The results shown above are from the**  
1824 **four other human cortical datasets discussed in the paper. Within the cross-regional Allen Brain Atlas**  
1825 **dataset, we also found that the top principal components of variation were overwhelmingly explained by**  
1826 **predicted cell type balance, with a model that included all 10 cell type indices accounting for a larger**  
1827 **percentage of the variation in the top 4 principal components (PC1:  $F(10, 830)=1051, R^2=0.927, p<2.2e-$**   
1828  **$16; PC2: F(10, 830)=96.98, R^2=0.539, p<2.2e-16; PC3: F(10, 830)=133.2, R^2= 0.616, p<2.2e-16; PC4:$**   
1829  **$F(10, 830)=121.3, R^2= 0.594, p<2.2e-16)$ , although the specific relationships sometimes differed from**  
1830 **what was seen in the prefrontal cortex.**

1831

1832

## Running Head: PREDICTING CELL TYPE BALANCE

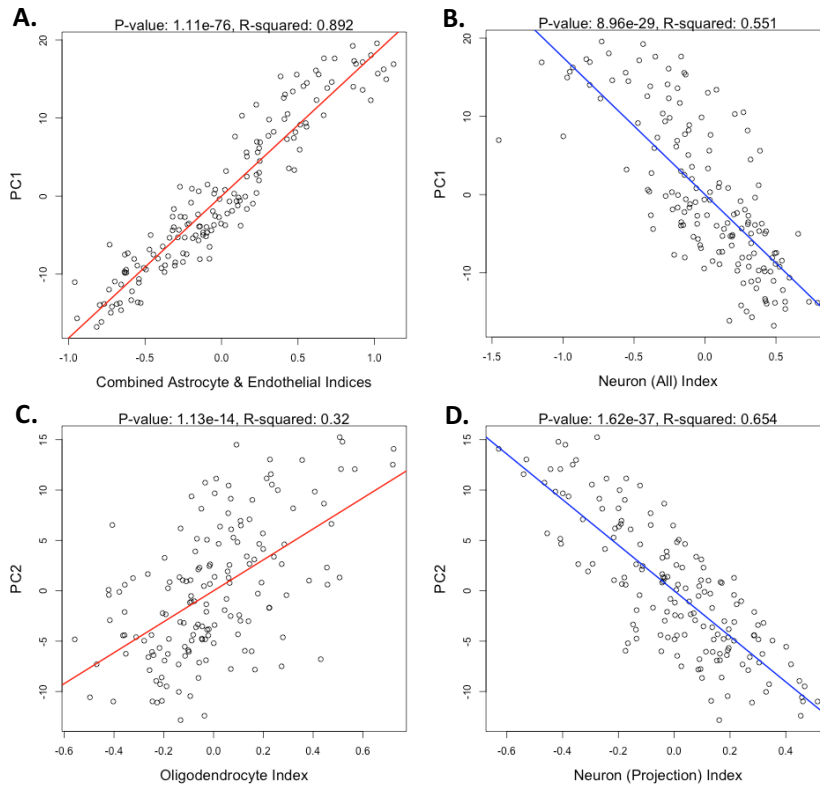

1833

1834 **Suppl. Figure 21. Cell content predictions explain a large percentage of the variability in microarray**  
1835 **data from non-cell type specific genes. The results shown here look almost identical to those shown in**  
1836 **Figure 5 , except that the principal components analysis in this case was run while excluding all cell type**  
1837 **specific genes from the dataset.**

1838

1839

1840

## Running Head: PREDICTING CELL TYPE BALANCE

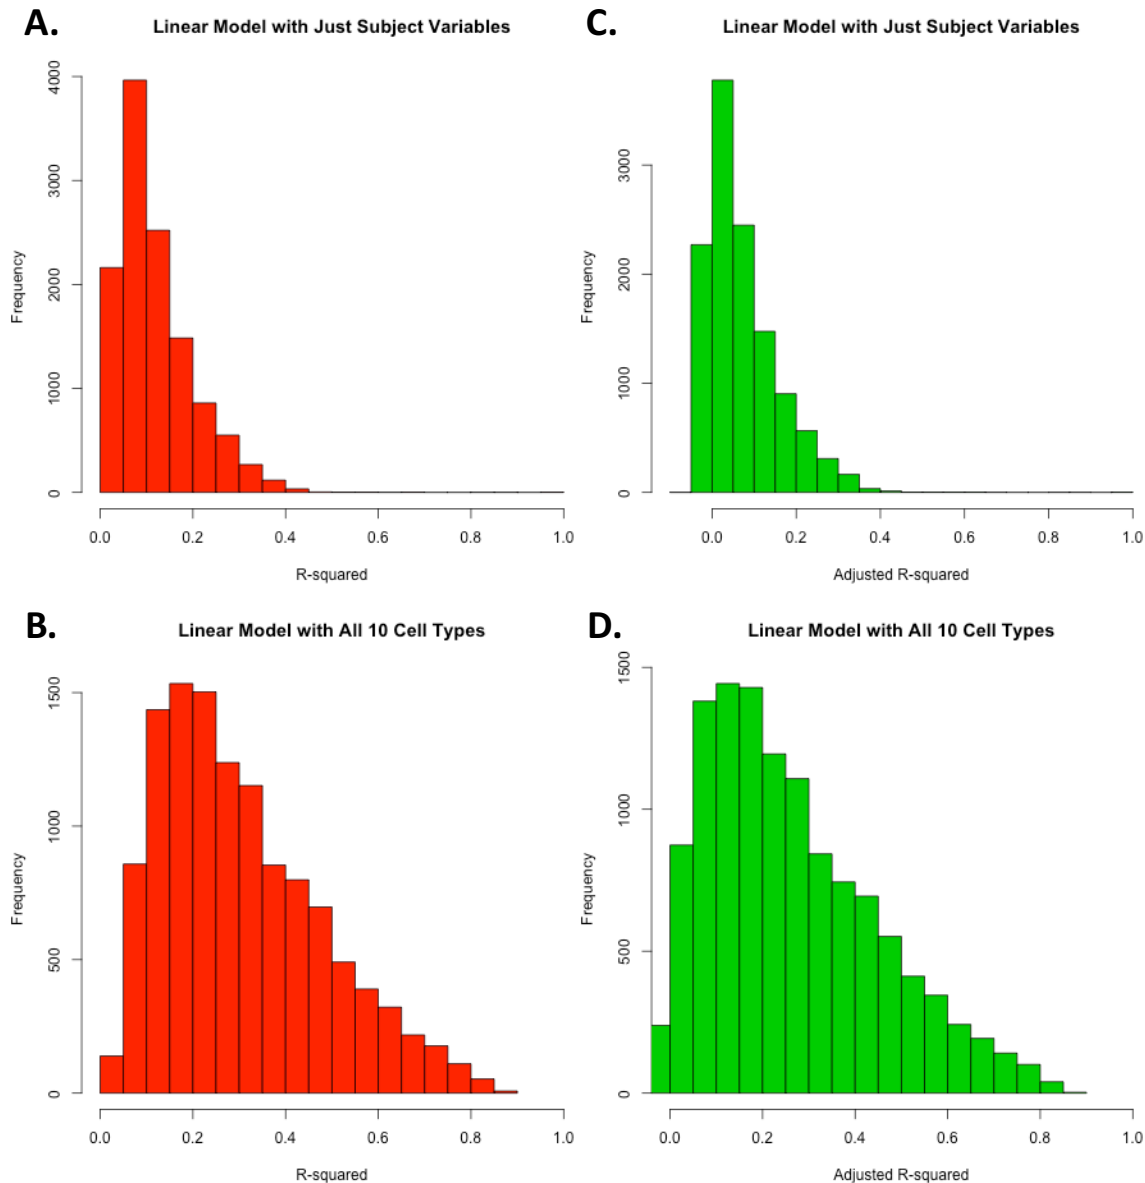

1841

1842 **Suppl. Figure 22. Predicted cell content accounts for a larger percentage of the variability in the signal**  
1843 **from individual probesets than the most commonly examined subject variables.** Shown below are  
1844 histograms illustrating the R-squared (A & B) and adjusted R-squared (C & D) for all 11979 probesets in  
1845 the Pritzker dorsolateral prefrontal cortex dataset as fit using two linear models: (A & C) A model that  
1846 includes diagnosis (MDD, BP, Schiz) and five subject variables commonly used as co-variates in the  
1847 analysis of brain microarray data (Brain pH, agonal factor, age, gender, post-mortem interval), (B & D)  
1848 A model that includes the consolidated indices for all 10 primary cell types.

1849

1850

1851

1852

1853 **7.7 Additional figures and results: Discriminating Between Changes in Cell Type Balance and Cell-**

1854 **Type Specific Function**

1855

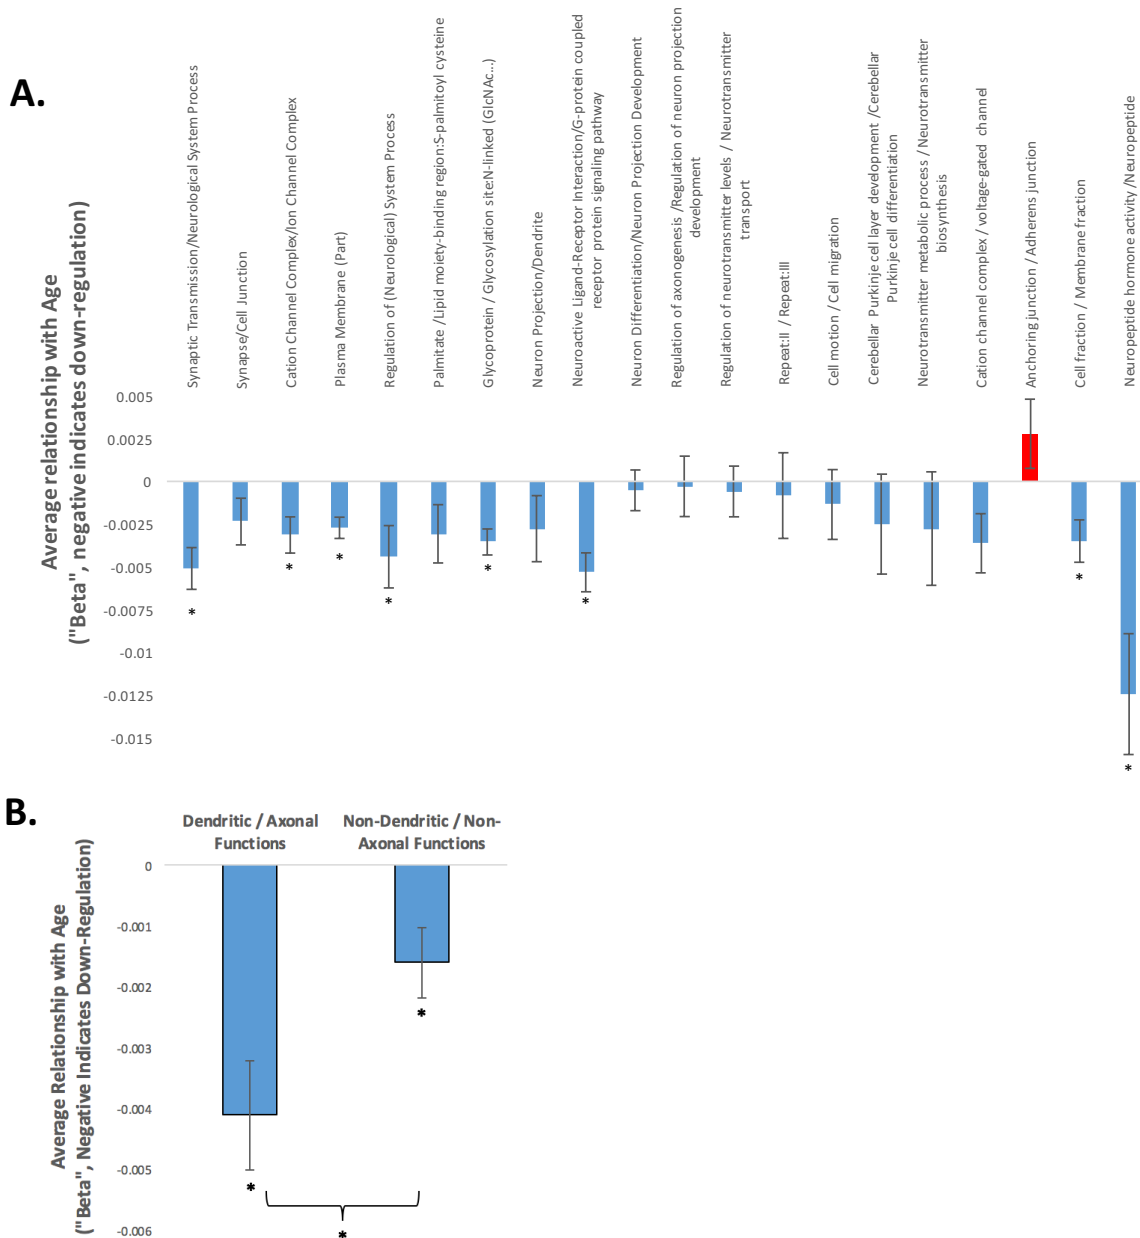

1856

1857 **Suppl. Figure 23. The predicted decrease in neuronal cell content in relationship to age is unlikely to**  
 1858 **be fully explained by synaptic atrophy. Within the list of neuron-specific genes, 240 functional clusters**  
 1859 **were identified using DAVID (using the full HT-U133A chip as background). A) The genes in 19 out of**  
 1860 **the top 20 functional clusters showed decreased expression with age on average, as determined within a**  
 1861 **linear model that controlled for known confounds. Depicted is the average effect of age +/-SE for each**

1862 *cluster (asterisks:  $p < 0.05$ ). Blue represents down-regulation, red is up-regulation. Overall, 76% of all*  
1863 *240 functional clusters showed a negative relationship with age on average (Suppl. Table 5). B.) We*  
1864 *blindly chose 29 functional clusters that were clearly related to dendritic/axonal functions and 41*  
1865 *functional clusters that seemed distinctly unrelated to dendritic/axonal functions. Transcripts from both*  
1866 *classifications showed an average decrease in expression with age ( $p = 9.197e-05$ ,  $p = 0.008756$ ,*  
1867 *respectively), but the decrease was larger for transcripts associated with dendritic/axonal-related*  
1868 *functions ( $p = 0.02339$ ). Depicted is the average effect of age  $\pm$  SE for each classification of cluster.*

1869

## 1870 **7.8 The Top Diagnosis-Related Genes Identified by Models that Include Cell Content Predictions**

### 1871 **Pinpoint Known Risk Candidates**

1872 Although the inclusion of predicted cell type balance in our model occasionally improved our  
1873 ability to detect previously-identified relationships with diagnosis, most relationships still went  
1874 undetected in the Pritzker dataset and none of the diagnosis relationships survived standard p-value  
1875 corrections for multiple comparisons when included in a full microarray analysis. This could be due to a  
1876 variety of factors, including microarray platform and probe sensitivity as well as the possibility that other  
1877 cell types in the dataset are showing effects in a competing direction. Therefore, we decided to ask a  
1878 complementary question: Of the top diagnosis relationships that we see in our dataset, how many have  
1879 been previously observed in the literature? If including predicted cell type balance in our models  
1880 improves the signal to noise ratio of our analyses, then we would expect that the top diagnosis-related  
1881 genes in our dataset would be more likely to overlap with previous findings. In an attempt to perform this  
1882 comparison in an unbiased and efficient manner, we limited our search to PubMed, using as search terms  
1883 only the respective human gene symbol and diagnosis (“Schizophrenia”, “Bipolar”, or “Depression”). For  
1884 the genes related to MDD in our dataset, we also expanded the search to include two highly-correlated  
1885 traits that are more quantifiable and likely to have a genetic basis: “Anxiety” and “Suicide”. Then we  
1886 narrowed our results only to studies using human subjects.

1887 Before controlling for cell type, we found that only one of the top 10 genes related to diagnosis  
1888 (FOS: (102,103)) or the presence or absence of psychiatric illness (ALDH1A1: (104)) had been  
1889 previously noted in the human literature. In contrast, when we used a model that included the five most  
1890 prevalent cortical cell types (Model#4), we found that five of the top 10 genes associated with

Running Head: PREDICTING CELL TYPE BALANCE

1891 Schizophrenia had been previously identified in the literature (ARHGEF2: (105), DOC2A: (106), FBX09:  
1892 (74), GRM1: (107,108); CEBPA: (89)), and three of the top 10 genes associated with Bipolar Disorder  
1893 (ALDH1A1: (104), SNAP25: (109), NRN1:(110); **Suppl. Figure 24, Suppl. Table 9**). This was a  
1894 significant enrichment in overlap with the literature when compared to the rate of overlap with the  
1895 literature for 100 randomly-selected genes in the dataset subjected to the same protocol (Schizophrenia:  
1896 5/10 vs. 7/100,  $p=0.0012$ ; Bipolar: 3/10 vs. 8/100,  $p=0.0610$ ). Likewise, if we replaced diagnosis with a  
1897 term representing the general presence or absence of a psychiatric illness, we found that four of the top 10  
1898 genes had been previously identified in the literature (ALDH1A1: (104); HBS1L: (4); HIVEP2: (111),  
1899 FBX09: (74), **Suppl. Figure 25, Suppl. Table 9**), and 9/10 of the top genes were actually significant with  
1900 an  $FDR < 0.05$  when using permutation based methods (using the R function `Imp{lmPerm}`,  
1901 iterations=9999). The top 10 genes associated with psychiatric illness in models selected using  
1902 forward/backward stepwise model selection (criterion=BIC) similarly included five that had been  
1903 previously identified in the literature (PRSS16: (112), GRM1: (107,108); ALDH1A1: (104); SNAP25:  
1904 (109); HIVEP2: (111), a significant improvement in overlap with the literature than what can be seen in  
1905 100 randomly-selected genes in the dataset subjected to the same protocol (Fisher's exact test: 5/10  
1906 vs.15/100,  $p=0.0168$ ).

1907       Together, we conclude that including cell content predictions in the analysis of macro-dissected  
1908 microarray data can sometimes improve the sensitivity of the assay for detecting altered gene expression  
1909 in relationship to psychiatric disease, especially if the dataset is confounded with dissection variation.

1910

1911



## Running Head: PREDICTING CELL TYPE BALANCE

### Top Genes Associated with Schizophrenia:

Eq.3: Diagnosis + Confounds:

| Probe    | Gene Symbol | Beta  | Pval     | FDR      |
|----------|-------------|-------|----------|----------|
| 11330_at | CTRC        | -0.13 | 1.00E-04 | 4.75E-01 |
| 1758_at  | DMP1        | -0.06 | 1.37E-04 | 4.75E-01 |
| 10086_at | HHLA1       | -0.40 | 1.70E-04 | 4.75E-01 |
| 23760_at | PITPNB      | -0.13 | 1.96E-04 | 4.75E-01 |
| 55760_at | DHX32       | -0.16 | 2.61E-04 | 4.75E-01 |
| 3397_at  | ID1         | -0.51 | 2.73E-04 | 4.75E-01 |
| 1414_at  | CRYBB1      | -0.12 | 3.04E-04 | 4.75E-01 |
| 7644_at  | ZNF91       | -0.29 | 3.26E-04 | 4.75E-01 |
| 26071_at | FAM127B     | 0.15  | 3.84E-04 | 4.75E-01 |
| 4878_at  | NPPA        | -0.17 | 3.98E-04 | 4.75E-01 |

Eq.6: Diagnosis + 5 Prevalent Cell Types & Confounds

| Probe    | Gene Symbol     | Beta  | Pval     | FDR      |
|----------|-----------------|-------|----------|----------|
| 9181_at  | <b>ARHGGEF2</b> | -0.12 | 3.96E-05 | 2.66E-01 |
| 8448_at  | <b>DOC2A</b>    | 0.18  | 4.55E-05 | 2.66E-01 |
| 3397_at  | ID1             | -0.53 | 6.69E-05 | 2.66E-01 |
| 23760_at | PITPNB          | -0.12 | 8.87E-05 | 2.66E-01 |
| 26268_at | <b>FBXO9</b>    | -0.16 | 2.53E-04 | 4.48E-01 |
| 11330_at | CTRC            | -0.10 | 3.12E-04 | 4.48E-01 |
| 81491_at | GPR63           | 0.12  | 4.28E-04 | 4.48E-01 |
| 2911_at  | <b>GRM1</b>     | 0.07  | 4.71E-04 | 4.48E-01 |
| 55760_at | DHX32           | -0.13 | 4.79E-04 | 4.48E-01 |
| 1050_at  | <b>CEBPA</b>    | 0.15  | 5.70E-04 | 4.48E-01 |

Eq.1: Diagnosis + All Cell Types & Confounds

| Probe    | Gene Symbol     | Beta  | Pval     | FDR      |
|----------|-----------------|-------|----------|----------|
| 3397_at  | ID1             | -0.54 | 3.68E-05 | 2.22E-01 |
| 8448_at  | <b>DOC2A</b>    | 0.17  | 6.26E-05 | 2.22E-01 |
| 9181_at  | <b>ARHGGEF2</b> | -0.12 | 6.78E-05 | 2.22E-01 |
| 23760_at | PITPNB          | -0.13 | 7.41E-05 | 2.22E-01 |
| 5376_at  | <b>PMP22</b>    | -0.24 | 1.67E-04 | 3.64E-01 |
| 1414_at  | CRYBB1          | -0.10 | 2.34E-04 | 3.64E-01 |
| 4878_at  | NPPA            | -0.14 | 2.65E-04 | 3.64E-01 |
| 11330_at | CTRC            | -0.10 | 2.68E-04 | 3.64E-01 |
| 23187_at | PHLDB1          | -0.17 | 4.41E-04 | 3.64E-01 |
| 2263_at  | <b>FGFR2</b>    | -0.16 | 4.49E-04 | 3.64E-01 |

### Top Genes Associated with Bipolar Disorder:

Eq.3: Diagnosis + Confounds:

| Probe    | Gene Symbol | Beta  | Pval     | FDR      |
|----------|-------------|-------|----------|----------|
| 4725_at  | NDUF55      | -0.15 | 7.77E-04 | 1.00E+00 |
| 51042_at | ZNF593      | 0.16  | 1.20E-03 | 1.00E+00 |
| 79705_at | LRRK1       | 0.10  | 1.64E-03 | 1.00E+00 |
| 10146_at | G3BP1       | 0.13  | 1.71E-03 | 1.00E+00 |
| 26664_at | OR7C1       | -0.08 | 1.85E-03 | 1.00E+00 |
| 4677_at  | NARS        | -0.08 | 1.89E-03 | 1.00E+00 |
| 2353_at  | <b>FOS</b>  | -0.63 | 2.00E-03 | 1.00E+00 |
| 23760_at | PITPNB      | -0.10 | 2.22E-03 | 1.00E+00 |
| 9815_at  | GIT2        | -0.05 | 2.44E-03 | 1.00E+00 |
| 7404_at  | UTY         | 0.04  | 2.87E-03 | 1.00E+00 |

Eq.6: Diagnosis + 5 Prevalent Cell Types & Confounds

| Probe    | Gene Symbol    | Beta  | Pval     | FDR      |
|----------|----------------|-------|----------|----------|
| 216_at   | <b>ALDH1A1</b> | -0.37 | 7.57E-05 | 9.06E-01 |
| 6616_at  | <b>SNAP25</b>  | -0.20 | 3.59E-04 | 1.00E+00 |
| 10146_at | G3BP1          | 0.14  | 7.61E-04 | 1.00E+00 |
| 4725_at  | NDUF55         | -0.15 | 8.07E-04 | 1.00E+00 |
| 51042_at | ZNF593         | 0.16  | 1.05E-03 | 1.00E+00 |
| 4677_at  | NARS           | -0.08 | 1.07E-03 | 1.00E+00 |
| 8534_at  | CHST1          | 0.21  | 1.09E-03 | 1.00E+00 |
| 23760_at | PITPNB         | -0.10 | 1.11E-03 | 1.00E+00 |
| 81567_at | TXNDC5         | 0.14  | 1.33E-03 | 1.00E+00 |
| 51299_at | <b>NRN1</b>    | -0.13 | 1.42E-03 | 1.00E+00 |

Eq.1: Diagnosis + All Cell Types & Confounds

| Probe    | Gene Symbol    | Beta  | Pval     | FDR      |
|----------|----------------|-------|----------|----------|
| 216_at   | <b>ALDH1A1</b> | -0.40 | 3.05E-05 | 2.21E-01 |
| 6616_at  | <b>SNAP25</b>  | -0.17 | 3.69E-05 | 2.21E-01 |
| 8534_at  | CHST1          | 0.22  | 4.33E-04 | 9.98E-01 |
| 29896_at | TRA2A          | -0.15 | 5.78E-04 | 9.98E-01 |
| 10146_at | G3BP1          | 0.14  | 6.58E-04 | 9.98E-01 |
| 90806_at | ANGEL2         | -0.09 | 7.27E-04 | 9.98E-01 |
| 4677_at  | NARS           | -0.08 | 1.24E-03 | 9.98E-01 |
| 79705_at | LRRK1          | 0.10  | 1.33E-03 | 9.98E-01 |
| 23510_at | KCTD2          | 0.10  | 1.34E-03 | 9.98E-01 |
| 81567_at | TXNDC5         | 0.13  | 1.41E-03 | 9.98E-01 |

### Top Genes Associated with MDD:

Eq.3: Diagnosis + Confounds:

| Probe     | Gene Symbol | Beta  | Pval     | FDR      |
|-----------|-------------|-------|----------|----------|
| 23476_at  | BRD4        | 0.12  | 7.10E-05 | 4.29E-01 |
| 5961_at   | PRPH2       | 0.21  | 7.16E-05 | 4.29E-01 |
| 9862_at   | MED24       | 0.15  | 2.08E-04 | 7.94E-01 |
| 10253_at  | SPRY2       | -0.21 | 3.20E-04 | 7.94E-01 |
| 10279_at  | PRSS16      | 0.11  | 3.31E-04 | 7.94E-01 |
| 23493_at  | HEY2        | -0.15 | 6.04E-04 | 9.16E-01 |
| 9148_at   | NEURL       | 0.11  | 6.40E-04 | 9.16E-01 |
| 79570_at  | NKAIN1      | 0.11  | 1.15E-03 | 9.16E-01 |
| 23163_at  | GGA3        | 0.09  | 1.59E-03 | 9.16E-01 |
| 139538_at | VENTXP1     | -0.03 | 1.60E-03 | 9.16E-01 |

Eq.6: Diagnosis + 5 Prevalent Cell Types & Confounds

| Probe    | Gene Symbol | Beta  | Pval     | FDR      |
|----------|-------------|-------|----------|----------|
| 5961_at  | PRPH2       | 0.21  | 6.96E-05 | 8.34E-01 |
| 23476_at | BRD4        | 0.11  | 2.12E-04 | 9.99E-01 |
| 8314_at  | BAP1        | 0.11  | 2.77E-04 | 9.99E-01 |
| 10279_at | PRSS16      | 0.10  | 5.10E-04 | 9.99E-01 |
| 379_at   | ARL4D       | -0.13 | 7.57E-04 | 9.99E-01 |
| 9862_at  | MED24       | 0.14  | 7.86E-04 | 9.99E-01 |
| 79570_at | NKAIN1      | 0.11  | 7.97E-04 | 9.99E-01 |
| 9985_at  | REC8        | 0.12  | 8.57E-04 | 9.99E-01 |
| 2535_at  | FZD2        | 0.08  | 9.54E-04 | 9.99E-01 |
| 3781_at  | KCNN2       | -0.14 | 1.19E-03 | 9.99E-01 |

Eq.1: Diagnosis + All Cell Types & Confounds

| Probe    | Gene Symbol | Beta  | Pval     | FDR      |
|----------|-------------|-------|----------|----------|
| 23476_at | BRD4        | 0.12  | 4.06E-05 | 4.86E-01 |
| 5961_at  | PRPH2       | 0.20  | 1.20E-04 | 5.49E-01 |
| 2535_at  | FZD2        | 0.08  | 1.37E-04 | 5.49E-01 |
| 8314_at  | BAP1        | 0.11  | 4.30E-04 | 9.99E-01 |
| 9985_at  | REC8        | 0.13  | 5.80E-04 | 9.99E-01 |
| 379_at   | ARL4D       | -0.13 | 9.74E-04 | 9.99E-01 |
| 9862_at  | MED24       | 0.13  | 1.06E-03 | 9.99E-01 |
| 10279_at | PRSS16      | 0.09  | 1.29E-03 | 9.99E-01 |
| 10767_at | HBS1L       | -0.18 | 1.33E-03 | 9.99E-01 |
| 79570_at | NKAIN1      | 0.10  | 1.40E-03 | 9.99E-01 |

1912

1913

1914 **Suppl. Figure 24. When analyzing the full dataset, the top genes associated with diagnosis in models**  
 1915 **that include cell content predictions include genes previously identified in the literature. Depicted are**  
 1916 **the top 10 genes associated with diagnosis using three different models of increasing complexity, along**  
 1917 **with their  $\beta$ 's (magnitude and direction of effect within the model – blue indicates downregulation, pink is**  
 1918 **upregulation), nominal p-values, and p-values that have been corrected for false detection rate using the**  
 1919 **Benjamini-Hochberg method. Gene symbols that are bolded and highlighted yellow have been previously**  
 1920 **detected in the human literature in association with their respective diagnosis in papers identified using**  
 1921 **the PubMed search terms “Schizophrenia” (Row 1) and “Bipolar” (Row 2). None of the top genes**  
 1922 **associated with major depressive disorder in any of the three models were found to be associated with**  
 1923 **“Depression”, “Anxiety”, or “Suicide” on PubMed (Row 3).**

1924

1925

## Running Head: PREDICTING CELL TYPE BALANCE

### Top Genes Associated with Psychiatric Illness:

#### Eq.3: Psychiatric + Confounds:

| Probe    | Gene Symbol    | Beta  | Pval     | FDR      |
|----------|----------------|-------|----------|----------|
| 7461_at  | CLIP2          | 0.16  | 2.18E-04 | 8.71E-01 |
| 26071_at | FAM127B        | 0.11  | 2.29E-04 | 8.71E-01 |
| 9862_at  | MED24          | 0.11  | 3.91E-04 | 8.71E-01 |
| 22864_at | R3HDM2         | -0.16 | 4.43E-04 | 8.71E-01 |
| 55700_at | MAP7D1         | 0.11  | 4.61E-04 | 8.71E-01 |
| 216_at   | <b>ALDH1A1</b> | -0.30 | 5.34E-04 | 8.71E-01 |
| 23760_at | PITPNB         | -0.08 | 6.38E-04 | 8.71E-01 |
| 2176_at  | FANCC          | -0.08 | 7.08E-04 | 8.71E-01 |
| 64427_at | TTC31          | 0.08  | 8.57E-04 | 8.71E-01 |
| 7832_at  | BTG2           | -0.16 | 8.87E-04 | 8.71E-01 |

#### Eq.6: Psychiatric + 5 Prevalent Cell Types & Confounds

| Probe    | Gene Symbol    | Beta  | Pval     | FDR      |
|----------|----------------|-------|----------|----------|
| 379_at   | ARL4D          | -0.12 | 1.26E-04 | 6.37E-01 |
| 216_at   | <b>ALDH1A1</b> | -0.24 | 3.02E-04 | 6.37E-01 |
| 7461_at  | CLIP2          | 0.14  | 4.06E-04 | 6.37E-01 |
| 10767_at | <b>HBS1L</b>   | -0.16 | 4.21E-04 | 6.37E-01 |
| 79778_at | MICALL2        | 0.09  | 4.57E-04 | 6.37E-01 |
| 23760_at | PITPNB         | -0.08 | 4.69E-04 | 6.37E-01 |
| 3300_at  | DNAJB2         | 0.12  | 4.80E-04 | 6.37E-01 |
| 5537_at  | PPP6C          | -0.07 | 5.75E-04 | 6.37E-01 |
| 3097_at  | <b>HIVEP2</b>  | -0.12 | 5.91E-04 | 6.37E-01 |
| 26268_at | <b>FBXO9</b>   | -0.10 | 7.58E-04 | 6.37E-01 |

#### Eq.1: Psychiatric + All Cell Types & Confounds

| Probe    | Gene Symbol    | Beta  | Pval     | FDR      |
|----------|----------------|-------|----------|----------|
| 379_at   | ARL4D          | -0.12 | 9.91E-05 | 5.12E-01 |
| 79778_at | MICALL2        | 0.08  | 2.07E-04 | 5.12E-01 |
| 3097_at  | <b>HIVEP2</b>  | -0.11 | 2.41E-04 | 5.12E-01 |
| 6616_at  | <b>SNAP25</b>  | -0.10 | 3.72E-04 | 5.12E-01 |
| 29896_at | TRA2A          | -0.11 | 3.79E-04 | 5.12E-01 |
| 7461_at  | CLIP2          | 0.14  | 3.79E-04 | 5.12E-01 |
| 2535_at  | FZD2           | 0.06  | 4.06E-04 | 5.12E-01 |
| 216_at   | <b>ALDH1A1</b> | -0.22 | 4.33E-04 | 5.12E-01 |
| 6604_at  | SMARCD3        | 0.12  | 4.46E-04 | 5.12E-01 |
| 8534_at  | CHST1          | 0.16  | 4.47E-04 | 5.12E-01 |

### Stepwise Regression:

#### Top Genes Associated with Psychiatric Illness:

| Probe    | Gene Symbol    | Beta  | Pval     |
|----------|----------------|-------|----------|
| 9862_at  | MED24          | 0.13  | 1.83E-05 |
| 7461_at  | CLIP2          | 0.17  | 4.74E-05 |
| 10279_at | <b>PRSS16</b>  | 0.10  | 8.86E-05 |
| 2911_at  | <b>GRM1</b>    | 0.05  | 1.11E-04 |
| 216_at   | <b>ALDH1A1</b> | -0.23 | 1.28E-04 |
| 379_at   | ARL4D          | -0.11 | 1.37E-04 |
| 6616_at  | <b>SNAP25</b>  | -0.11 | 1.39E-04 |
| 8534_at  | CHST1          | 0.16  | 1.45E-04 |
| 3097_at  | <b>HIVEP2</b>  | -0.12 | 1.53E-04 |
| 64427_at | TTC31          | 0.08  | 1.67E-04 |

#### Top Genes Associated with Suicide:

| Probe    | Gene Symbol | Beta  | Pval     |
|----------|-------------|-------|----------|
| 8526_at  | DGKE        | 0.035 | 1.81E-05 |
| 64718_at | UNKL        | 0.106 | 2.40E-05 |
| 65998_at | C11orf95    | 0.17  | 6.56E-05 |
| 84617_at | TUBB6       | 0.162 | 9.41E-05 |
| 4752_at  | NEK3        | -0.08 | 1.72E-04 |
| 9640_at  | ZNF592      | 0.158 | 2.27E-04 |
| 25940_at | FAM98A      | -0.11 | 3.00E-04 |
| 80176_at | SPSB1       | 0.087 | 3.01E-04 |
| 1051_at  | CEBPB       | 0.249 | 4.04E-04 |
| 50515_at | CHST11      | 0.069 | 4.18E-04 |

1926

1927 *Suppl. Figure 25. When analyzing the full dataset, the top genes associated with psychiatric illness in*  
 1928 *models that include cell content predictions include genes previously identified in the literature.*  
 1929 *Depicted are the top 10 genes associated with psychiatric illness using three different models of*  
 1930 *increasing complexity, or associated with psychiatric illness or suicide in models chosen using stepwise*  
 1931 *regression. Notably, the results from stepwise regression for the diagnosis term are not included in this*  
 1932 *figure because the term was only included in the model for eight genes total (DHX32, ID1, CSRP1,*  
 1933 *AKR1B10, TBPL1, HIST1H4F, SETD3, GAL). Included are the  $\beta$ 's (magnitude and direction of effect*  
 1934 *within the model – blue indicates downregulation, pink is upregulation), nominal p-values, and p-values*  
 1935 *that have been corrected for false detection rate using the Benjamini-Hochberg method. Note that the p-*  
 1936 *values associated with stepwise regression are likely to be optimistic due to overfitting. Gene symbols*  
 1937 *that are bolded and highlighted yellow have been previously detected in the human literature in*  
 1938 *association with their respective diagnosis in papers identified using the PubMed search terms*  
 1939 *“Schizophrenia”, “Bipolar”, “Depression”, “Anxiety”, or “Suicide”.*

1940

1941

1942

1943

Running Head: PREDICTING CELL TYPE BALANCE

1944

**Eq.8 Interaction Terms: Psych \* Prevalent Cell Types:**

**Psychiatric:**

| Probe    | Gene Symbol | Beta  | Pval     | FDR      |
|----------|-------------|-------|----------|----------|
| 379_at   | ARL4D       | -0.12 | 1.54E-04 | 6.53E-01 |
| 3097_at  | HIVEP2      | -0.13 | 2.43E-04 | 6.53E-01 |
| 216_at   | ALDH1A1     | -0.24 | 2.68E-04 | 6.53E-01 |
| 10767_at | HBS1L       | -0.16 | 2.91E-04 | 6.53E-01 |
| 4677_at  | NARS        | -0.06 | 3.83E-04 | 6.53E-01 |
| 7461_at  | CLIP2       | 0.14  | 4.48E-04 | 6.53E-01 |
| 3300_at  | DNAJB2      | 0.125 | 4.76E-04 | 6.53E-01 |
| 23760_at | PITPNB      | -0.08 | 5.01E-04 | 6.53E-01 |
| 79778_at | MICALL2     | 0.086 | 5.34E-04 | 6.53E-01 |
| 5537_at  | PPP6C       | -0.07 | 6.47E-04 | 6.53E-01 |

**Psychiatric\*Astrocyte**

| Probe    | Gene Symbol | Beta  | Pval     | FDR      |
|----------|-------------|-------|----------|----------|
| 28958_at | CCDC56      | -0.46 | 1.75E-05 | 1.87E-01 |
| 23305_at | ACSL6       | 0.617 | 3.12E-05 | 1.87E-01 |
| 9929_at  | JOSD1       | 0.438 | 8.44E-05 | 3.37E-01 |
| 55751_at | TMEM184C    | 0.312 | 1.64E-04 | 4.92E-01 |
| 64794_at | DDX31       | -0.37 | 3.55E-04 | 6.65E-01 |
| 58525_at | WIZ         | -0.23 | 3.69E-04 | 6.65E-01 |
| 8492_at  | PRSS12      | -0.3  | 3.89E-04 | 6.65E-01 |
| 3709_at  | ITPR2       | 0.22  | 4.46E-04 | 6.68E-01 |
| 81890_at | QTRT1       | -0.48 | 5.21E-04 | 6.93E-01 |
| 9514_at  | GAL3ST1     | 0.339 | 6.30E-04 | 7.55E-01 |

**Psychiatric\*Microglia**

| Probe     | Gene Symbol | Beta  | Pval     | FDR      |
|-----------|-------------|-------|----------|----------|
| 55308_at  | DDX19A      | 0.324 | 5.07E-05 | 3.26E-01 |
| 6351_at   | CCL4        | -0.58 | 5.44E-05 | 3.26E-01 |
| 23305_at  | ACSL6       | -0.51 | 4.48E-04 | 9.96E-01 |
| 79953_at  | TMEM90B     | -0.39 | 4.57E-04 | 9.96E-01 |
| 116496_at | FAM129A     | 0.264 | 5.55E-04 | 9.96E-01 |
| 26539_at  | OR10H1      | -0.82 | 6.99E-04 | 9.96E-01 |
| 9278_at   | ZBTB22      | -0.32 | 9.99E-04 | 9.96E-01 |
| 11326_at  | VSIG4       | 0.491 | 1.05E-03 | 9.96E-01 |
| 1415_at   | CRYBB2      | -0.34 | 1.07E-03 | 9.96E-01 |
| 2615_at   | LRRC32      | -0.45 | 1.31E-03 | 9.96E-01 |

**Psychiatric\*Interneuron**

| Probe     | Gene Symbol | Beta  | Pval     | FDR      |
|-----------|-------------|-------|----------|----------|
| 3638_at   | INSIG1      | -1.57 | 3.76E-05 | 1.91E-01 |
| 56937_at  | PMEPA1      | -0.95 | 7.23E-05 | 1.91E-01 |
| 50835_at  | TAS2R9      | -0.4  | 8.67E-05 | 1.91E-01 |
| 39_at     | ACAT2       | -1.77 | 1.06E-04 | 1.91E-01 |
| 3606_at   | IL18        | -0.31 | 1.06E-04 | 1.91E-01 |
| 10473_at  | HMGN4       | 0.846 | 1.24E-04 | 1.91E-01 |
| 50489_at  | CD207       | 0.655 | 1.34E-04 | 1.91E-01 |
| 79053_at  | ALG8        | 1.179 | 1.37E-04 | 1.91E-01 |
| 4693_at   | NDP         | 1.462 | 1.43E-04 | 1.91E-01 |
| 253943_at | YTHDF3      | 1.522 | 1.94E-04 | 2.32E-01 |

**Psychiatric\*Projection Neuron**

| Probe    | Gene Symbol | Beta  | Pval     | FDR      |
|----------|-------------|-------|----------|----------|
| 10473_at | HMGN4       | -0.56 | 2.29E-04 | 9.96E-01 |
| 56606_at | SLC2A9      | -0.54 | 3.31E-04 | 9.96E-01 |
| 652_at   | BMP4        | 0.585 | 3.57E-04 | 9.96E-01 |
| 3586_at  | IL10        | 0.255 | 4.63E-04 | 9.96E-01 |
| 4649_at  | MYO9A       | 1.102 | 5.58E-04 | 9.96E-01 |
| 23288_at | IQCE        | 0.347 | 5.82E-04 | 9.96E-01 |
| 23385_at | NCSTN       | -0.55 | 6.35E-04 | 9.96E-01 |
| 9582_at  | APOBEC3B    | 0.174 | 8.10E-04 | 9.96E-01 |
| 50807_at | ASAP1       | -0.76 | 1.01E-03 | 9.96E-01 |
| 80146_at | UXS1        | -0.67 | 1.25E-03 | 9.96E-01 |

**Psychiatric\*Oligodendrocyte**

| Probe    | Gene Symbol | Beta  | Pval     | FDR      |
|----------|-------------|-------|----------|----------|
| 11184_at | MAP4K1      | -0.39 | 2.21E-04 | 1.00E+00 |
| 5936_at  | RBM4        | 0.621 | 4.58E-04 | 1.00E+00 |
| 10432_at | RBM14       | 0.513 | 6.94E-04 | 1.00E+00 |
| 51073_at | MRPL4       | -0.39 | 1.02E-03 | 1.00E+00 |
| 8552_at  | INE1        | -0.34 | 1.51E-03 | 1.00E+00 |
| 22934_at | RPIA        | 0.355 | 1.56E-03 | 1.00E+00 |
| 10351_at | ABCA8       | 1.005 | 1.63E-03 | 1.00E+00 |
| 10428_at | CFDP1       | 0.487 | 1.74E-03 | 1.00E+00 |
| 23180_at | RFTN1       | 0.723 | 1.86E-03 | 1.00E+00 |
| 58488_at | PCTP        | 0.289 | 1.95E-03 | 1.00E+00 |

1945

1946

1947 **Suppl. Figure 26. When analyzing the full dataset using a model that includes Psychiatric Illness\*Cell**  
 1948 **Type interaction terms, the top genes associated with psychiatric illness include genes previously**  
 1949 **identified in the literature. Depicted are the top 10 genes associated with psychiatric illness and its**  
 1950 **interaction with the five most prevalent cell types in the cortex using the model in Equation 6:**

1951 **Equation 7:**

1952  $Gene\ Expression = \beta_0 + \beta_1*(Astrocyte\ Index) +$   
 1953  $+ \beta_2*(Microglia\ Index) + \beta_3*(Neuron\_Interneuron\ Index) + \beta_4*(Neuron\_Projection\ Neuron$   
 1954  $Index) + \beta_5*(Oligodendrocyte\ Index) + \beta_6*(Brain\ pH) + \beta_7*(Agonal\ Factor) + \beta_8*(PMI) +$   
 1955  $\beta_9*(Age) + \beta_{10}*(Gender) + \beta_{11}*(Psychiatric\ Illness) + \beta_{12}*(Psychiatric\ Illness)*(Astrocyte$   
 1956  $Index) + \beta_{13}*(Psychiatric\ Illness)*(Microglia\ Index) + \beta_{14}*(Psychiatric$   
 1957  $Illness)*(Neuron\_Interneuron\ Index) + \beta_{15}*(Psychiatric\ Illness)*(Neuron\_Projection\ Neuron$   
 1958  $Index) + \beta_{17}*(Psychiatric\ Illness)*(Oligodendrocyte\ Index) + \epsilon$

1959  
 1960 *Included are the β's (magnitude and direction of effect within the model – blue indicates downregulation,*  
 1961 *pink is upregulation), nominal p-values, and p-values that have been corrected for false detection rate*  
 1962 *using the Benjamini-Hochberg method. The number of top genes that were found to be previously-*

Running Head: PREDICTING CELL TYPE BALANCE

1963 *identified in literature does not significantly surpass what was observed in a group of 100 randomly*  
1964 *selected genes from our dataset (14/60 vs. 15/100).*  
1965

1966 **8. Supplementary Tables**

1967 **Suppl. Table 1. Master Database of Cortical Cell Type Specific Gene Expression.** The attached excel  
1968 document contains a single spreadsheet listing the genes defined as having cell type specific expression in  
1969 our manuscript, including the species, age of the subjects, and brain region from which the cells were  
1970 purified, the platform used to measure transcript, the statistical criteria and comparison cell types used to  
1971 define “cell type specific expression”, the gene symbol or orthologous gene symbol in mouse/human  
1972 (depending on the species used in the original experiment), and citation. If a gene was identified as  
1973 having cell type specific expression in multiple experiments, there is an entry for each experiment – thus  
1974 the full 3383 rows included in the spreadsheet do not represent 3383 individual cell type specific genes. A  
1975 web-version of this spreadsheet kept interactively up-to-date can be found at  
1976 <https://sites.google.com/a/umich.edu/megan-hastings-hagenauer/home/cell-type-analysis>.

1977 **Suppl. Table 2. Microarray data spanning 160 human brain regions downloaded from the Allen Brain**  
1978 **Atlas.** Included in this excel file are three worksheets. The first includes all of the sample information,  
1979 including the subject identifier and brain region. The second includes all of the probe information.  
1980 Finally, the third includes the relative expression for each probe for each sample (z-score), including the  
1981 official gene symbol, Entrez gene ID, and gene name. Additional information about the human  
1982 microarray dataset can be found on the Allen Brain Atlas website.

1983 **Suppl. Table 3. The average cell type indices for all 160 brain regions included in the Allen Brain Atlas**  
1984 **dataset.** This excel file contains two worksheets. The first includes the average cell type index for 10  
1985 primary cell types for all 160 brain regions included in the Allen Brain Atlas. More detail about those  
1986 brain regions can be found in the first worksheet (Columns\_Sample Info) in **Suppl. Table 2**. The second  
1987 spreadsheet contains the standard error (SE) for the averages in the first worksheet.

1988 **Suppl. Table 4. Output for the analyses of cell type vs. subject variables for all datasets.** The first  
1989 spreadsheet provides the output from the meta-analysis for each cell type vs. subject variable  
1990 combination (“b”= the estimated effect, provided in the units for the variable – e.g., the effect of one  
1991 year of age, or the effect of one hour of PMI; “SE”= standard error, “p-value”= nominal p-value,  
1992 “BH\_adj\_P-value (q-value)”= the p-value corrected for multiple comparisons). The second spreadsheet  
1993 includes the T-statistics for all cell type vs. subject variable combinations for all datasets.

1994 **Suppl. Table 5. Functions associated with genes identified as having neuron-specific expression.** The  
1995 first column of the excel spreadsheet is a list of general physiological functions that were identified by  
1996 DAVID as associated with our list of neuron-specific genes (relative to the full list of probesets included  
1997 in the microarray). We used the functional cluster option in DAVID because it prevents multiple functions  
1998 that share a large subset of overlapping genes from dominating the results. We named each cluster by the  
1999 top two functions included in it. The second column of the spreadsheet indicates whether an experimenter  
2000 blindly categorized the functional cluster as being clearly related or unrelated to synaptic function. The  
2001 “Mean Fold Enrichment” column indicates how well on average each of the functions within that cluster  
2002 were associated with our list of neuron-specific genes. The next three columns (Top p-value, Top  
2003 Bonferroni-corrected p-value, and top BH (Benjamini-Hochberg)-corrected p-value) indicate the  
2004 statistical strength of the association between the top function within that cluster and our list of neuron-  
2005 specific genes. The number of genes from each functional cluster included in our results is listed in  
2006 column G. The next few columns indicate the strength of the relationship between the functional cluster  
2007 and age. Columns H-J indicate the mean, standard deviation, and standard error, for the betas for Age  
2008 for each gene included in the cluster. The betas indicate the strength and direction of the association with  
2009 Age as determined within a larger linear model controlling for known confounds (pH, PMI, gender,  
2010 agonal factor). Columns K-M indicate whether, on average, the age-related betas for the genes in that  
2011 cluster are statistically different from 0 as determined by a Welch’s t-test (t-stat, df, p-value). The final



2012 *column indicates what percentage of the genes included in the cluster have a negative relationship ( $\beta$ )*  
2013 *with age.*

2014 **Suppl. Table 6. A .gmt file created using our database of cell type specific genes for use with Gene Set**  
2015 **Enrichment Analysis (GSEA). This file should be in the correct format for usage with either GSEA**  
2016 **(<http://software.broadinstitute.org/gsea/index.jsp>) or fGSEA.**

2017 **Suppl. Table 7. Performing Gene Set Enrichment Analysis using a .gmt that includes traditional**  
2018 **functional gene sets and cell type specific gene lists indicates that cell type specific gene sets are**  
2019 **enriched for effects related to a wide variety of subject variables.** *Gene set enrichment analysis was*  
2020 *performed using the results from a differential expression analysis performed on the Pritzker dataset*  
2021 *using a model that included diagnosis, pH, agonal factor, age, PMI, and sex. The gene set enrichment*  
2022 *results for each variable is included as its own worksheet in the file.*

2023 **Suppl. Table 8. Previously-identified relationships between gene expression and psychiatric illness in**  
2024 **the human cortex in either particular cell types or macro-dissected cortex.** *We used this database of*  
2025 *previously-identified effects to determine whether controlling for cell type while performing differential*  
2026 *expression analyses increased our ability to observe previously-documented effects.*

2027 **Suppl. Table 9. The relationship between diagnosis and all probesets in the Pritzker Dorsolateral**  
2028 **Prefrontal Cortex dataset as assessed using models of increasing complexity.** *For all probesets in the*  
2029 *dataset, the spreadsheets for Model #2 and Model#4 include the  $\beta$  for all variables in the model (“Beta”:*  
2030 *magnitude and direction of the association, with positive associations labeled pink and negative*  
2031 *associations labeled blue), the p-value (“Pval\_nominal”) and the p-value adjusted for multiple*  
2032 *comparisons using the Benjamini-Hochberg method (“BH\_Adj”), both labeled with green indicating*  
2033 *more significant relationships and red indicating less significant relationships. There are also summary*  
2034 *spreadsheets that include just the results for Bipolar Disorder and Schizophrenia for Models#1-5. In*  
2035 *these spreadsheets, the formatting is a little different: T-statistics are provided, the  $\beta$  is called “LogFC”,*  
2036 *the BH\_Adj p-value is called “adj.P.Val”.*

2037 **Suppl. Table 10. The relationship between diagnosis and all genes in the CMC RNA-Seq dataset as**  
2038 **assessed using models of increasing complexity.** *There are two summary spreadsheets that include the*  
2039 *results for Bipolar Disorder and Schizophrenia for Models#1-5. For all genes in the dataset, each*  
2040 *spreadsheet includes the  $\beta$  (“LogFC”: magnitude and direction of the association), the T-statistic, the p-*  
2041 *value (“Pval\_nominal”) and the p-value adjusted for multiple comparisons using the Benjamini-*  
2042 *Hochberg method (“adj.P.Val”) for the effect of diagnosis in each model (#M1-M5).*

2043 **Suppl. Table 11. The relationship between diagnosis and all probesets in the Barnes et al. microarray**  
2044 **dataset as assessed using models of increasing complexity.** *There is a summary spreadsheet that*  
2045 *includes the results for Schizophrenia for Models#1-5. For all probesets in the dataset, each spreadsheet*  
2046 *includes the  $\beta$  (“LogFC”: magnitude and direction of the association), the T-statistic, the p-value*  
2047 *(“Pval\_nominal”) and the p-value adjusted for multiple comparisons using the Benjamini-Hochberg*  
2048 *method (“adj.P.Val”) for the effect of diagnosis in each model (#M1-M5).*

2049 **Suppl. Table 12. The relationship between diagnosis and all probesets in the Lanz et al. microarray**  
2050 **dataset as assessed using models of increasing complexity.** *There are two summary spreadsheets that*  
2051 *include the results for Bipolar Disorder and Schizophrenia for Models#1-5. For all probesets in the*  
2052 *dataset, each spreadsheet includes the  $\beta$  (“LogFC”: magnitude and direction of the association), the T-*  
2053 *statistic, the p-value (“Pval\_nominal”) and the p-value adjusted for multiple comparisons using the*  
2054 *Benjamini-Hochberg method (“adj.P.Val”) for the effect of diagnosis in each model (#M1-M5).*

2055 **Suppl. Table 13. The relationship between diagnosis and all probesets in the Narayan et al. microarray**  
2056 **dataset as assessed using models of increasing complexity.** There is a summary spreadsheet that  
2057 includes the results for Schizophrenia for Models#1-5. For all probesets in the dataset, each spreadsheet  
2058 includes the  $\beta$  (“LogFC”: magnitude and direction of the association), the T-statistic, the p-value  
2059 (“Pval\_nominal”) and the p-value adjusted for multiple comparisons using the Benjamini-Hochberg  
2060 method (“adj.P.Val”) for the effect of diagnosis in each model (#M1-M5).

2061 **Suppl. Table 14. Sample demographics for the Pritzker Consortium Dorsolateral Prefrontal Cortex**  
2062 **Affymetrix microarray data.**

2063 **Suppl. Table 15. The relationship between each cell type index and all probes in the Pritzker**  
2064 **Dorsolateral Prefrontal Cortex dataset.** The attached excel document (.xlsx) contains multiple  
2065 spreadsheets. The first spreadsheet (“Methods”) contains a brief summary of the methods used to  
2066 evaluate the relationship between the cell type indices and expression of each probe in the dataset (also  
2067 discussed in the body of the manuscript). The second spreadsheet (“GeneByCellType\_DF”) contains the  
2068 statistical output associated with all cell type index terms in the linear model for all probes in the dataset,  
2069 including the  $\beta$  (“Beta”: magnitude and direction of the association, with positive associations labeled  
2070 pink and negative associations labeled blue), the p-value from the original model (“Pval”) and the p-  
2071 value adjusted for multiple comparisons using the Benjamini-Hochberg method (“AdjP”), both labeled  
2072 with green indicating more significant relationships and red indicating less significant relationships. All  
2073 other spreadsheets contain the top 100 probes positively associated with each cell type index, including  
2074 each of the statistical outputs presented in the full “GeneByCellType\_DF” summary spreadsheet, as well  
2075 as a column “CellTypeSpecific” which indicates whether the probe was included in one of the original  
2076 cell type indices (1=included, 0=not included).

2077 **Suppl. Table 16. The relationship between each cell type index and all probes in the Allen Brain Atlas**  
2078 **dataset.** Depicted are the  $\beta$  (magnitude and direction) and p-values for the relationship between the  
2079 expression for each probe and each primary cell type across samples from all 160 brain regions as  
2080 determined in a large linear model that includes all 10 primary cell types. Please note that the p-values in  
2081 this spreadsheet have not been corrected for multiple comparisons. Additional information about the  
2082 probes can be found in **Suppl. Table 2.**

2083  
2084  
2085  
2086
